# Supplementary material for: Regio- and chemoselective hydroboration of terminal alkynes with pinacolborane catalyzed by organo rare earth metal complexes
Source: Royal Society of Chemistry journal article supplement (doi:10.1039/d3nj04957d), 2024-01-01

## Supporting Information

### **Regio- and Chemoselective Hydroboration of Terminal Alkynes with Pinacolborane Catalyzed by Organo Rare Earth Metal Complexes**

Muhammad Asif Iqbal,<sup>a</sup> Xiangqian Yan,<sup>a</sup> Ruoling Li,<sup>a</sup> Fu Zhijia,<sup>a</sup> Shaowen Zhang,<sup>\*a</sup> Xiaofang  
Li<sup>\*a</sup>

<sup>a</sup> School of Chemistry and Chemical Engineering, Key Laboratory of Cluster Science of  
Ministry of Education, Beijing Institute of Technology, 5 South Zhongguancun Street,  
Haidian District, Beijing, 100081, China

## Table of Contents

|                                                                                       |      |
|---------------------------------------------------------------------------------------|------|
| 1. General Remarks.....                                                               | S-3  |
| 2. General procedure for the Yttrium(iv)-catalyzed hydroboration of alkynes.....      | S-3  |
| 3. Reaction conditions screening for hydroboration of terminal alkyne <b>3a</b> ..... | S-4  |
| 4. General method for the synthesis of deuterium phenylacetylene and DBpin.....       | S-5  |
| 5. Mechanistic investigation.....                                                     | S-7  |
| 6. Product Transformation.....                                                        | S-13 |
| 7. Characterization of Products.....                                                  | S-15 |
| 8. References.....                                                                    | S-30 |
| 9. Copies of <sup>1</sup> H, <sup>13</sup> C NMR spectra.....                         | S-33 |

## 1. General Remarks

All reactions were carried out under a nitrogen atmosphere using oven-dried glassware and standard Schlenk techniques in glove boxes. All of the solvents were dried and distilled over sodium. HBpin and part of alkynes were obtained commercially from Energy Chemical, Mayar, Acros, Alfa Aesar, or TCI without further purification. ( $\eta^3$ -Flu-SiMe<sub>2</sub>-N(<sup>t</sup>Bu)Y(CH<sub>2</sub>SiMe<sub>3</sub>)(THF)<sub>2</sub>) was synthesized according to the corresponding literatures.<sup>[1]</sup> TLC has been performed on Merck silica gel 60 F<sub>254</sub> TLC aluminum plates and visualized with UV light (254 nm). <sup>1</sup>H-NMR spectra were recorded on a 400 MHz NMR spectrometer in CDCl<sub>3</sub> (all signals are reported in ppm with the internal chloroform signal at 7.26 ppm). <sup>13</sup>C NMR spectra were recorded with <sup>1</sup>H-decoupling on a Bruker Advance 101 or 176 MHz spectrometer in CDCl<sub>3</sub> (all signals are reported in ppm with the internal chloroform signal at 77.16 ppm). Melting points were measured on a melting point with a thermometer and are uncorrected.

## 2. General procedure for the Yttrium(IV)-catalyzed hydroboration of alkynes

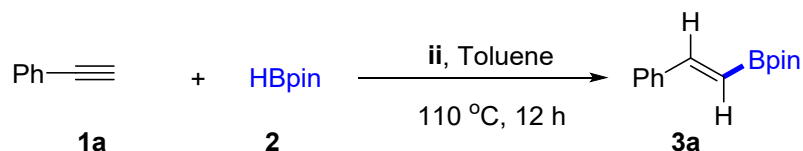

In an oven-dried Schlenk flask, a mixture of ethynylbenzene (**1a**) (0.30 mmol, 36.6 mg), 4,4,5,5-tetramethyl-1,3,2-dioxaborolane (**2**) (1.2 mmol, 153.5 mg),  $\eta^3$ -Flu-SiMe<sub>2</sub>N(<sup>t</sup>Bu)Y(CH<sub>2</sub>SiMe<sub>3</sub>)-(THF)<sub>2</sub> (5 mol%), the mixture was well stirred for 12 h in toluene (2 mL) at 110 °C. After cooling, the reaction was quenched with saturated NH<sub>4</sub>Cl aqueous solution (4 mL). The resulting mixture was extracted by Ethyl acetate (EA) (3×15 mL), and the combined extracts were washed with

brine, dried over sodium sulfate, and concentrated under reduced pressure. Purification by column chromatography (eluent: Petroleum ether: Ethyl acetate = 10:1) to give the product (E)-4,4,5,5-tetramethyl-2-styryl-1,3,2-dioxaborolane **3a** (66 mg, 96%).

### 3. Reaction conditions screening for hydroboration of terminal alkyne **3a**

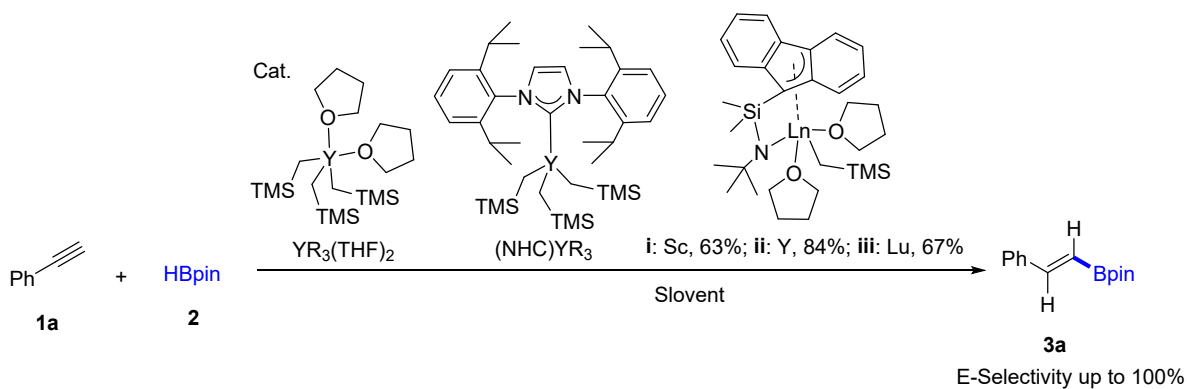

| Entry          | Cat. (mol%)                                 | [HBpin]/[ <b>1a</b> ] | Base                            | Solvent                         | T (°C) | Time (h) | Yield (%) <sup>e</sup> |
|----------------|---------------------------------------------|-----------------------|---------------------------------|---------------------------------|--------|----------|------------------------|
| 1              | -                                           | 1.2                   | -                               | C <sub>6</sub> D <sub>6</sub>   | 70     | 36       | -                      |
| 2              | <b>YR<sub>3</sub>(THF)<sub>2</sub></b> (10) | 1.2                   | -                               | C <sub>6</sub> D <sub>6</sub>   | 70     | 36       | -                      |
| 3              | <b>(NHC)YR<sub>3</sub></b> (10)             | 1.2                   | -                               | C <sub>6</sub> D <sub>6</sub>   | 70     | 36       | -                      |
| 4              | <b>ii</b> (10)                              | 1.2                   | -                               | C <sub>6</sub> D <sub>6</sub>   | 70     | 36       | 34                     |
| 5              | <b>ii</b> (10)                              | 1.2                   | -                               | C <sub>6</sub> D <sub>6</sub>   | 110    | 36       | 62                     |
| <sup>b</sup> 6 | <b>ii</b> (10)                              | 1.2                   | <sup>t</sup> BuONa              | C <sub>6</sub> D <sub>6</sub>   | 110    | 36       | 62                     |
| <sup>c</sup> 7 | <b>ii</b> (10)                              | 1.2                   | Na <sub>2</sub> CO <sub>3</sub> | C <sub>6</sub> D <sub>6</sub>   | 110    | 36       | 42                     |
| <sup>d</sup> 8 | <b>ii</b> (10)                              | 1.2                   | Et <sub>3</sub> N               | C <sub>6</sub> D <sub>6</sub>   | 110    | 36       | 52                     |
| 9              | <b>ii</b> (10)                              | 1.5                   | -                               | C <sub>6</sub> D <sub>6</sub>   | 110    | 36       | 59                     |
| 10             | <b>ii</b> (10)                              | 2.0                   | -                               | C <sub>6</sub> D <sub>6</sub>   | 110    | 36       | 63                     |
| 11             | <b>ii</b> (10)                              | 3.0                   | -                               | C <sub>6</sub> D <sub>6</sub>   | 110    | 36       | 86                     |
| 12             | <b>ii</b> (10)                              | 4.0                   | -                               | C <sub>6</sub> D <sub>6</sub>   | 110    | 12       | 99                     |
| 13             | <b>ii</b> (10)                              | 5.0                   | -                               | C <sub>6</sub> D <sub>6</sub>   | 110    | 12       | 99                     |
| 14             | <b>ii</b> (10)                              | 4.0                   | -                               | C <sub>6</sub> D <sub>6</sub>   | 110    | 12       | 70                     |
| 15             | <b>ii</b> (10)                              | 4.0                   | -                               | C <sub>6</sub> D <sub>6</sub>   | 90     | 12       | 66                     |
| 16             | <b>ii</b> (10)                              | 4.0                   | -                               | C <sub>4</sub> D <sub>8</sub> O | 110    | 12       | 70                     |
| 17             | <b>ii</b> (10)                              | 4.0                   | -                               | C <sub>7</sub> D <sub>8</sub>   | 110    | 12       | 99                     |
| 18             | <b>ii</b> (5)                               | 4.0                   | -                               | C <sub>7</sub> D <sub>8</sub>   | 110    | 12       | 99                     |
| 19             | <b>ii</b> (2)                               | 4.0                   | -                               | C <sub>7</sub> D <sub>8</sub>   | 110    | 12       | 72                     |
| 20             | <b>ii</b> (1)                               | 4.0                   | -                               | C <sub>7</sub> D <sub>8</sub>   | 110    | 12       | 61                     |
| 21             | <b>ii</b> (5)                               | 4.0                   | -                               | C <sub>7</sub> D <sub>8</sub>   | 100    | 6        | 55                     |
| 22             | <b>ii</b> (5)                               | 4.0                   | -                               | C <sub>7</sub> D <sub>8</sub>   | 100    | 12       | 84                     |
| 23             | <b>i</b> (5)                                | 4.0                   | -                               | C <sub>7</sub> D <sub>8</sub>   | 110    | 12       | 98                     |
| 24             | <b>iii</b> (5)                              | 4.0                   | -                               | C <sub>7</sub> D <sub>8</sub>   | 110    | 12       | 92                     |
| 25             | <b>ii</b> (10)                              | 4.0                   | -                               | -                               | 110    | 12       | 99                     |

<sup>a</sup> Reaction conditions: **1a** (0.15 mmol), 0.7 mL of solvent in a Schlenk NMR tube under N<sub>2</sub>, unless otherwise indicated. <sup>b</sup> Added 0.1 equiv. of <sup>t</sup>BuONa; <sup>c</sup> Added 0.1 equiv. of Na<sub>2</sub>CO<sub>3</sub>; <sup>d</sup> Added 0.1 equiv. of Et<sub>3</sub>N, <sup>e</sup> Yield determined by GC and <sup>1</sup>H NMR spectroscopy.

#### 4. General method for the synthesis of deuterium phenylacetylene and DBpin

##### 4.1 The synthesis of deuterium phenylacetylene<sup>[2]</sup>

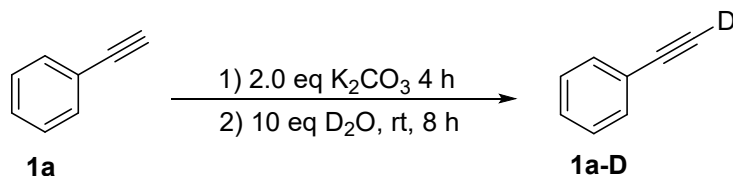

An oven-dried 10 mL 2-neck round-bottom flask was charged with phenylacetylene (1.02g, 10.0 mmol), potassium carbonate (2.76 g, 2.0 equiv.), and dry MeCN (10 mL). The reaction mixture was stirred under an N<sub>2</sub> atmosphere for 4 h. To this mixture, D<sub>2</sub>O (2.0 mL, 10.0 equiv.) was added and left to stir for an additional 8 h. The resulting crude reaction mixture was diluted with CH<sub>2</sub>Cl<sub>2</sub> (10.0 mL) and transferred to an oven-dried separating funnel. The organic layer was separated and dried over MgSO<sub>4</sub>, filtered, and the solvent removed under reduced pressure. The crude product was separated through column chromatography using distilled hexane to afford 989.4 mg (97%) deuterated phenylacetylene as a colorless liquid. Spectral data are in accordance with the reported data.<sup>[3]</sup>

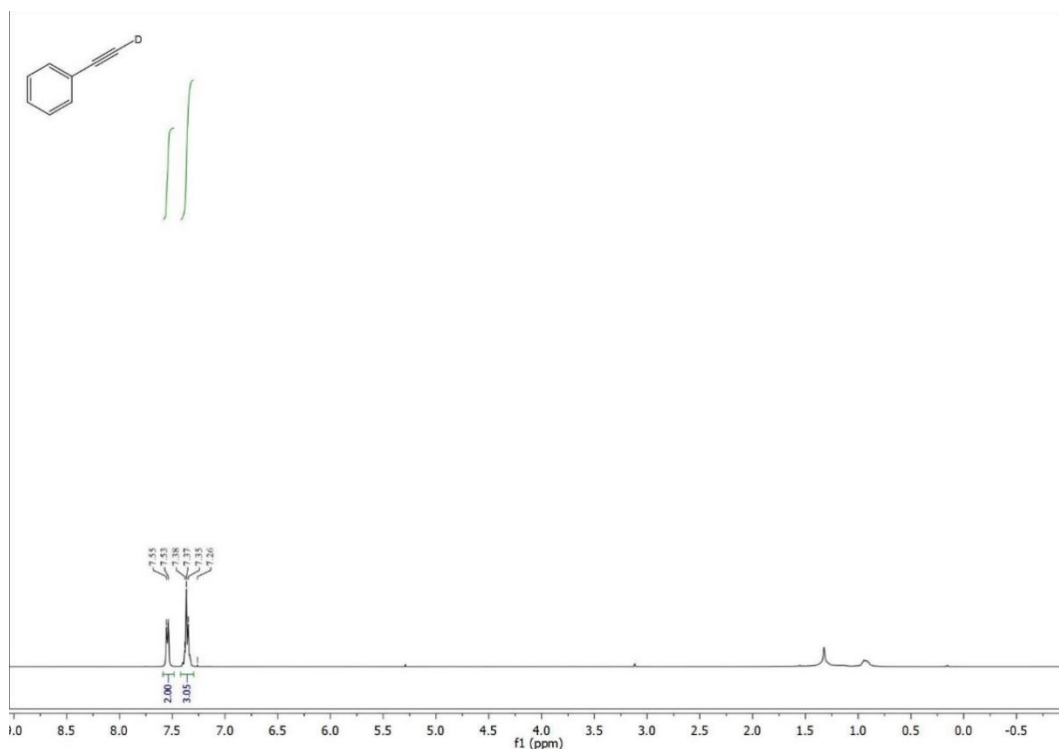

**Figure S1:**  $^1\text{H}$  NMR ( $\text{CDCl}_3$ , 400 MHz ) spectra of 1a-D

#### 4.2 The synthesis of deuterium DBpin<sup>[4]</sup>

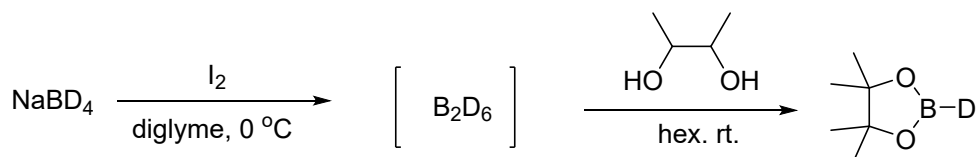

A Schlenk was charged with  $\text{NaBD}_4$  (0.5 g, 12.2 mmol) and was suspended in diglyme (25 mL). To a second Schlenk pinacol (0.48 g, 4.08 mmol) was dissolved in hexane (25 mL). A cannula was fitted between the two Schlenks with the cannula submersed in the hexane solution. An exit needle was fitted to this flask. Iodine (1.55 g, 6.11 mmol) was dissolved in diglyme (25 mL) and this was added dropwise over 1h to the  $\text{NaBD}_4$  suspension. On completion of the addition, a gentle stream of nitrogen was passed through the hexane for 1 hour to remove unreacted  $\text{B}_2\text{D}_6$ , the hexane solution of DBpin (b.p. = 110 °C) was distilled to give pure DBpin. The product was then analyzed by NMR. Spectral data are in accordance with the reported data<sup>[5]</sup>.

## 5. Mechanistic Investigation:

### 5.1. Deuterium labelling Experiments

In a glove box, a sealed Schlenk tube equipped with a magnetic stirring bar was charged with ( $\eta^3$ -Flu-SiMe<sub>2</sub>-N(<sup>t</sup>Bu)Y(CH<sub>2</sub>SiMe<sub>3</sub>)(THF)<sub>2</sub> (**ii**) ( 5 mol%), pinacol borane ( 4 equiv.), phenyl acetylene-d1 ( 0.30 mmol) and 2 mL of toluene. The reaction mixture was heated at 110 °C for 12 hours. <sup>1</sup>H NMR of vinyl borate shows that the hydrogen has been deuterated, which indicates a cis orientation of deuterium and phenyl group in **3a-D**.

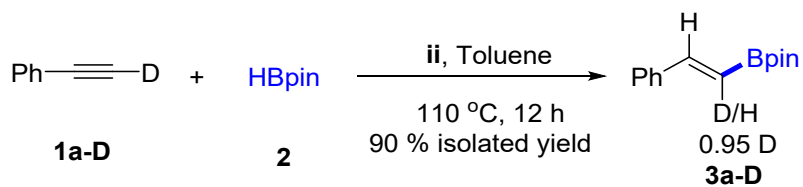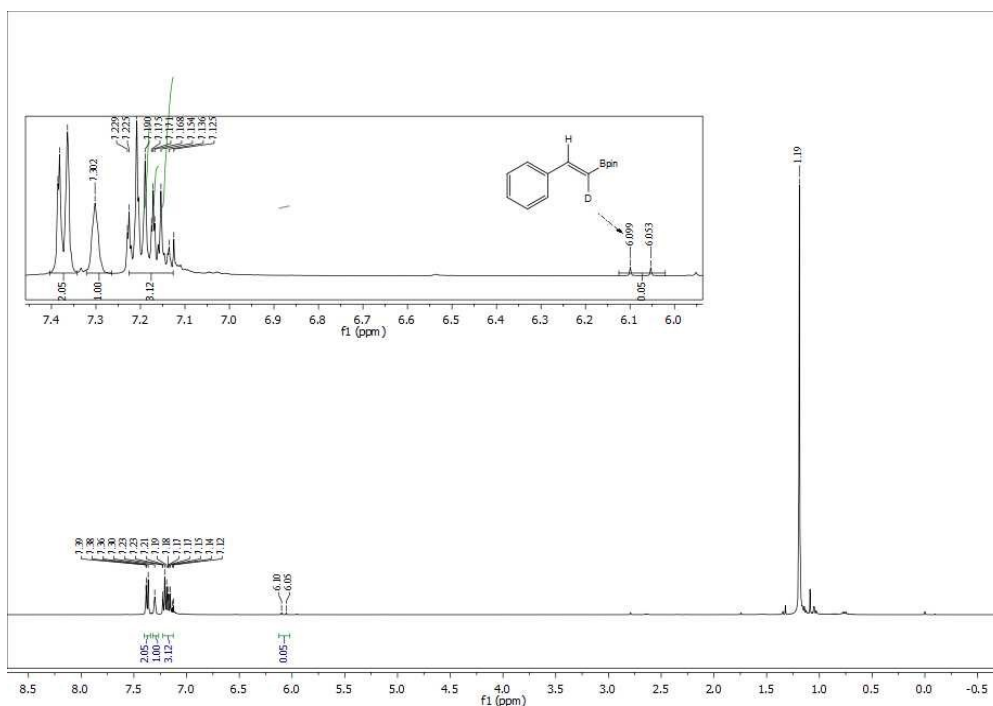

**Figure S2:** <sup>1</sup>H NMR (CDCl<sub>3</sub>, 400 MHz ) spectra of **3a-D**

In a glove box, a sealed Schlenk tube equipped with a magnetic stirring bar was charged

with ( $\eta^3$ -Flu-SiMe<sub>2</sub>-N(<sup>t</sup>Bu)Y(CH<sub>2</sub>SiMe<sub>3</sub>)(THF)<sub>2</sub> (**ii**) ( 5 mol%), pinacol borane-d<sub>1</sub> (4 equiv.), **1a** (0.30 mmol) and 2 mL of toluene. The reaction mixture was heated at 110 °C for 12 h. <sup>1</sup>H NMR of vinyl borate shows that the hydrogen has been deuterated, which indicates a cis orientation of deuterium and Bpin unit in **3a-D\***

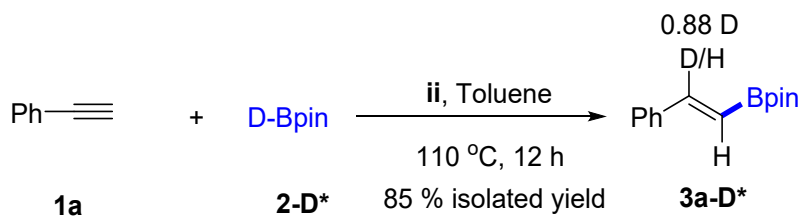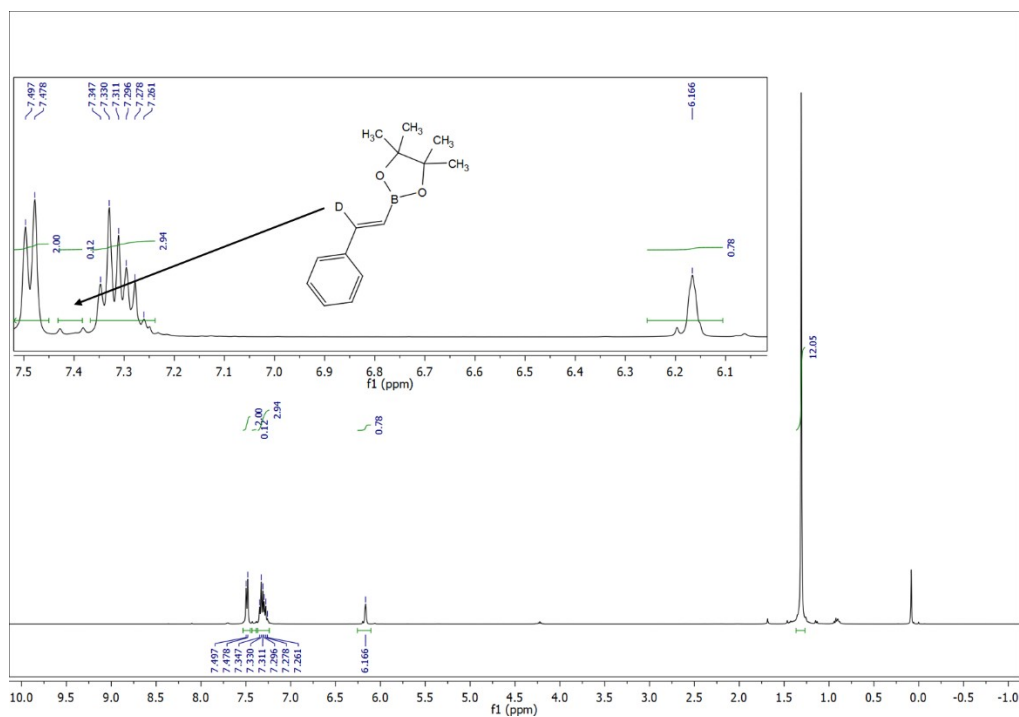

**Figure S3:** <sup>1</sup>H NMR (CDCl<sub>3</sub>, 400 MHz) spectra of **3a-D\***

## 5.2 NMR of (3-1) after I<sub>2</sub> quenching<sup>[6]</sup>

In order to confirm the existence of a Y-alkenyl intermediate, an I<sub>2</sub> quenching experiment was carried out. In a NMR tube I<sub>2</sub> solution in CDCl<sub>3</sub> was added to the reaction mixture of **ii**



(0.1mmol) + **2**(0.1 mmol) + **1a**(0.1 mmol). NMR analysis of the reaction mixture further confirmed the formation of (2-iodovinyl)benzene.

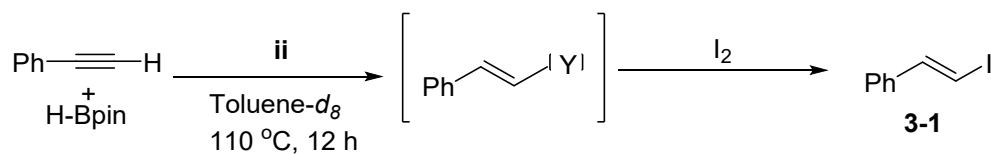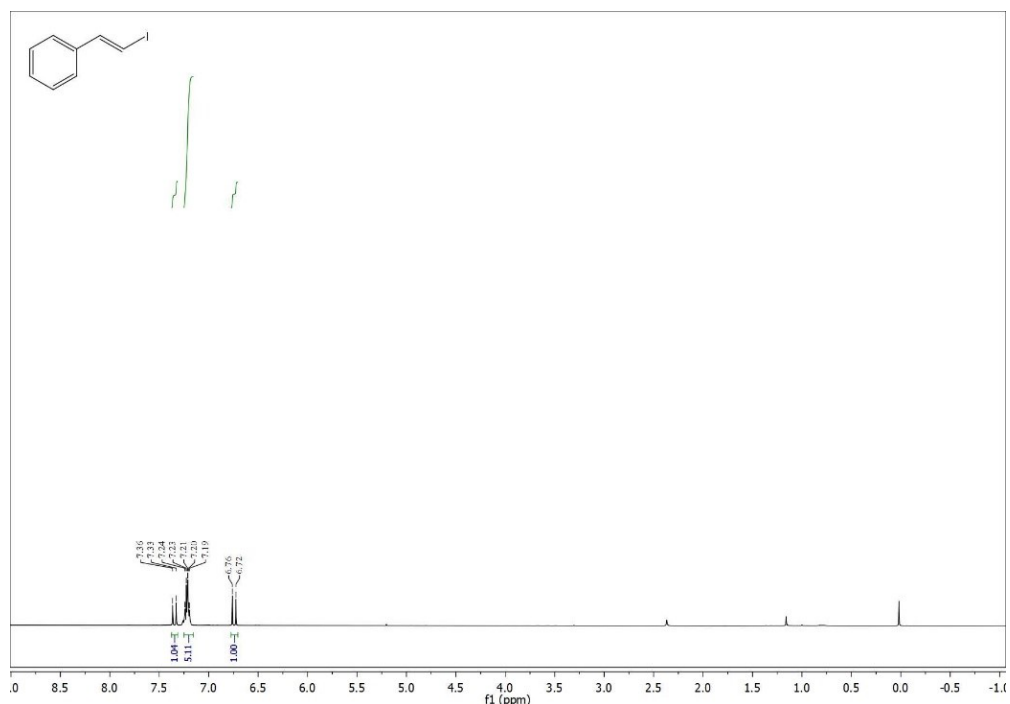

**Figure S4:**  $^1\text{H}$  NMR ( $\text{CDCl}_3$ , 400 MHz) spectra of **3-1**

### 5.3 ESI-Mass spectra of byproduct

In order to confirm the existence of a boronate compound  $\text{TMSCH}_2\text{B}(\text{OCMe}_2\text{CMe}_2\text{O})$ , which should generate from  $\sigma$ -bond metathesis reaction of **ii** and HBpin Y-alkenyl intermediate, The reaction mixture of **ii** (0.1mmol) + **2**(0.1 mmol) + **1a**(0.1 mmol). ESI-Mass analysis of the reaction mixture further confirmed the formation of boronate compound  $\text{TMSCH}_2\text{B}(\text{OCMe}_2\text{CMe}_2\text{O})$ .

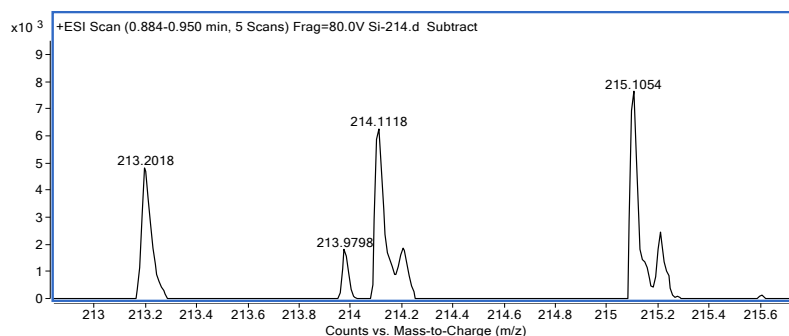

**Figure S5:** ESI-Mass spectra of TMSCH<sub>2</sub>B(OCMe<sub>2</sub>CMe<sub>2</sub>O).

### 5.4 <sup>1</sup>H NMR-monitoring the model reaction

In a glovebox, (*η*<sup>3</sup>-Flu-SiMe<sub>2</sub>-N(*t*Bu)Y(CH<sub>2</sub>SiMe<sub>3</sub>)(THF)<sub>2</sub> (**ii**) ( 5 mol%) in toluene-*d*<sub>8</sub> and pinacolborane (0.0384 mg, 4 equiv.) were weighed into an NMR tube equipped with a Teflon valve (J-Young). Then, to which a mixture of **1a** (10.2 mg, 0.1 mmol) in toluene-*d*<sub>8</sub> (0.5 mL) was added via a syringe. The ensuing catalytic reaction was monitored by <sup>1</sup>H NMR spectroscopy. After 3 h, 8 h and 12 h at 110 °C in an oil bath, the catalytic reaction reaches > 99% completion

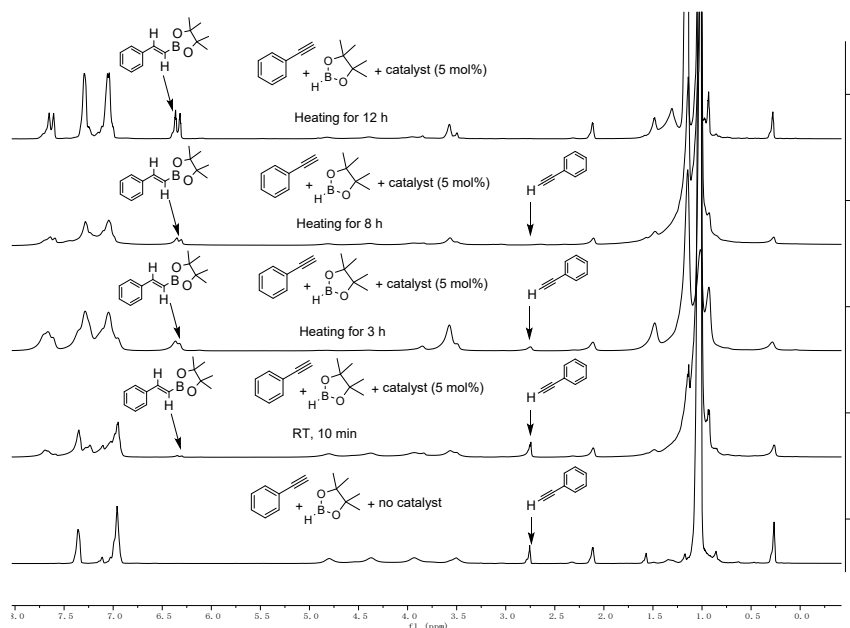

**Figure S6:** *in-situ* <sup>1</sup>H NMR spectra for the reaction of **1a** and HBpin catalyzed by **ii** in toluene-*d*<sub>8</sub> at 110 °C.

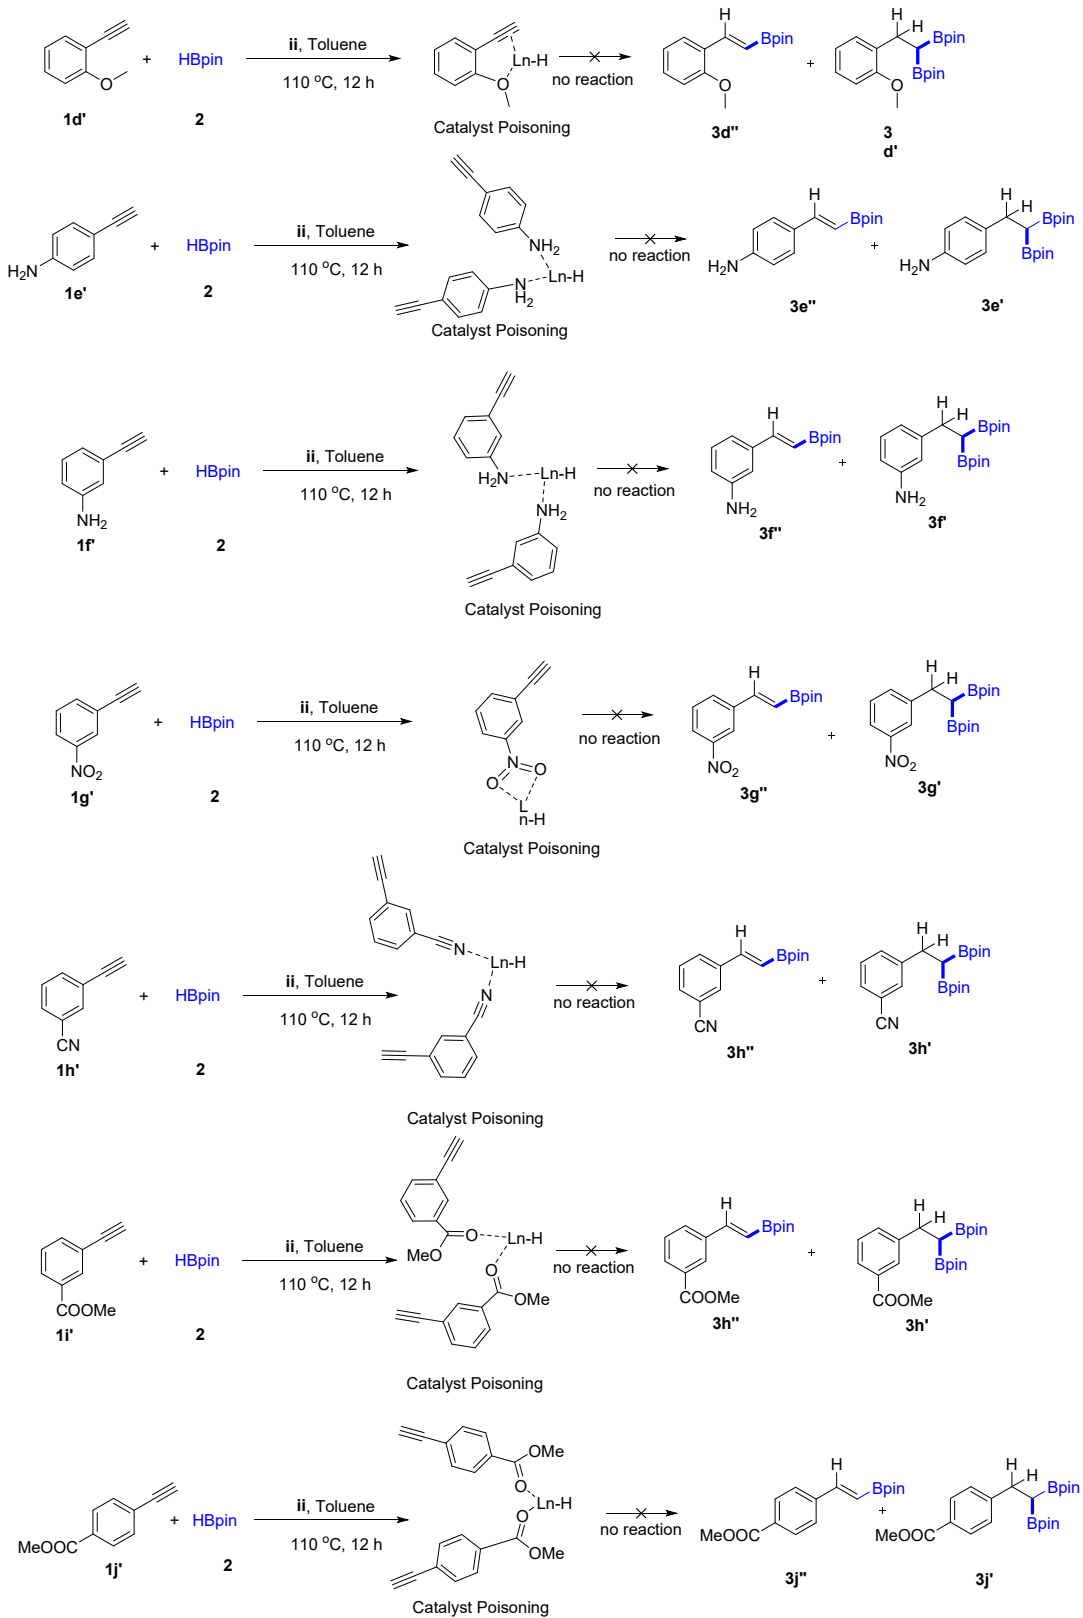

Figure S7. The further investigation of rare-earth catalyzed dihydroborylation of phenylacetylene

derivatives.

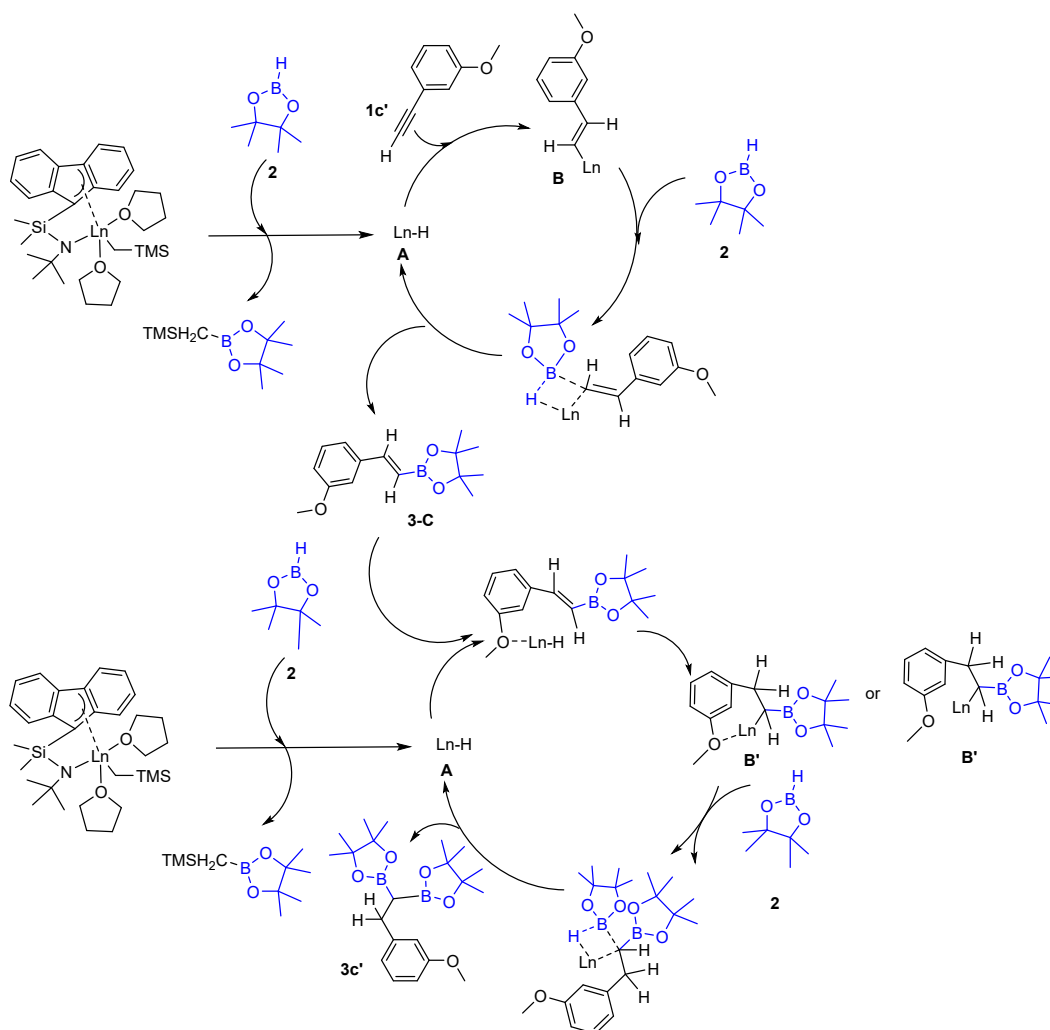

**Figure S8:** The proposed mechanism of the 1,1-diborylation of the substrate 1c'.

## 6 Product Transformation

### Procedure for the synthesis of (3a) with 1.02 g of 1a.

In an oven-dried Schlenk flask, a mixture of ethynylbenzene (**1a**) (10 mmol, 1.02 g), 4,4,5,5-tetramethyl-1,3,2-dioxaborolane (**2**) (40 mmol, 5.08 g),  $\eta^3$ -Flu-SiMe<sub>2</sub>N(<sup>t</sup>Bu)Y(CH<sub>2</sub>SiMe<sub>3</sub>)-(THF)<sub>2</sub> (5 mol%, 30.6 mg), the mixture was well stirred for 12 h in toluene (80 mL) at 110 °C. After cooling, the reaction was quenched with saturated NH<sub>4</sub>Cl aqueous solution (120 mL). The resulting mixture was extracted by Ethyl acetate (EA) (3×250 mL), and the combined extracts were washed with brine, dried over sodium sulfate, and concentrated under reduced pressure. Purification by column chromatography (eluent: Petroleum ether: Ethyl acetate = 10:1) to give the product (E)-4,4,5,5-tetramethyl-2-styryl-1,3,2-dioxaborolane **3a** (2.2 g, 99%).

### Procedure for the synthesis of (E)-(2-iodovinyl)benzene (3-1) from 3a<sup>[7]</sup>

The substrate **3a** (0.5 mmol, 115 mg) was dissolved in 1.25 mL THF in a 25 mL round bottom flask, then an aqueous solution of NaOH (1.5 mmol, 3 M) was added dropwise at room temperature. Subsequently, a solution of I<sub>2</sub> (1.0 mmol, 254 mg, 0.2 M in THF) was added slowly and stirred for 2 h before quenching with a saturated solution of sodium thiosulfate. The organic solution was separated, and the aqueous solution was washed with Et<sub>2</sub>O. The combined organic layers were dried with MgSO<sub>4</sub>, the solvent was evaporated and the crude product was isolated on silica gel using flash chromatography (PE as eluent) .

### Procedure for the synthesis of 2-phenylacetaldehyde (3-2) from 3a<sup>[7]</sup>

The substrate **3a** (0.23 g, 1 mmol) was dissolved in acetone (10 mL) and cooled to 0 °C, Oxone solution (0.3 g, 1.5 mmol in 15 mL H<sub>2</sub>O) was then added dropwisely and further stirred for 1 h. Upon completion the reaction was quenched with 1M HCl (5 mL) and extracted with DCM,

the combined organics were washed with water, and brine and dried with MgSO<sub>4</sub>. The solvent was evaporated under reduced pressure, and the crude product was isolated on silica gel using flash chromatography (PE: EA = 10:1).

**Procedure for the synthesis of 2,5-diphenyl-1*H*-imidazole (3-3) from 3a<sup>[8]</sup>**

A sealed Schlenk tube equipped with a magnetic stirring bar was charged with the substrate **3a** (0.5 mmol, 115 mg), benzimidamide (1.0 equiv), N-Bromosuccinimide (2.5 equiv), and 2.5 mL of DMSO. The reaction mixture was heated at 110 °C for 24 h under N<sub>2</sub>. Upon completion, the reaction was quenched with H<sub>2</sub>O and extracted with ethyl acetate, the combined organic layer wash with water, and brine and dried with MgSO<sub>4</sub>. The solvent was evaporated under reduced pressure, and the crude product was isolated on silica gel using flash chromatography (PE: EA = 10:2).

**Procedure for the synthesis of (*E*)-prop-1-ene-1,3-diyl dibenzene (3-4) from 3a<sup>[9]</sup>**

A sealed Schlenk tube equipped with a magnetic stirring bar was charged with the substrate **3a** (0.5 mmol, 115 mg), (bromomethyl)benzene (1.2 equiv), Pd(acac)<sub>2</sub> (10 mol%), KF (3 equiv), and THF (3.0 mL). The reaction mixture was heated at 0 °C for 15 min then 4 h at 35 °C h under N<sub>2</sub>. Upon completion of the reaction the organic solvent was evaporated under reduced pressure, and the crude product was extracted with ethyl acetate, the combined organic layer wash with water, and brine and dried with MgSO<sub>4</sub>. The solvent was evaporated under reduced pressure, and the crude product was isolated on silica gel using flash chromatography (PE as eluent).

## **7 Characterization of Products:**

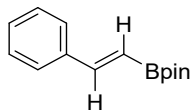

**(E)-4,4,5,5-tetramethyl-2-styryl-1,3,2-dioxaborolane (3a)**

The representative procedure was followed using Phenylacetylene (**1a**) (31 mg, 0.30 mmol). Purification by column chromatography (eluent: Petroleum ether: Ethyl acetate = 10:1) yielded **3a** (66 mg, 96%) as a colorless oil. <sup>1</sup>H NMR (400 MHz, CDCl<sub>3</sub>) δ 7.49 (d, *J* = 6.8 Hz, 2H), 7.40 (d, *J* = 18.4 Hz, 1H), 7.28-7.36 (m, 3H), 6.17 (d, *J* = 18.4 Hz, 1H), 1.32 (s, 12H). <sup>13</sup>C NMR (101 MHz, CDCl<sub>3</sub>) δ 149.7, 137.6, 129.0, 128.7, 127.2, 83.5, 77.36, 25.0. The spectra data are in accordance with those reported in the literature.<sup>[7]</sup>

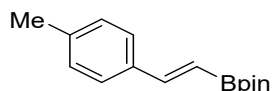

**(E)-4,4,5,5-tetramethyl-2-(4-methylstyryl)-1,3,2-dioxaborolane (3b)**

The representative procedure was followed using 4-Ethynyltoluene (**1b**) (35 mg, 0.30 mmol). Purification by column chromatography (eluent: Petroleum ether: Ethyl acetate = 10:1) yielded **3b** (66 mg, 93%) as a colorless oil. <sup>1</sup>H NMR (400 MHz, CDCl<sub>3</sub>) δ 7.33-7.43 (m, 3H), 7.14 (d, *J* = 8.0 Hz, 2H), 6.11 (d, *J* = 18.4 Hz, 1H), 2.35 (s, 3H), 1.31 (s, 12H). <sup>13</sup>C NMR (101 MHz, CDCl<sub>3</sub>) δ 149.6, 139.1, 134.9, 129.4, 127.2, 83.4, 77.4, 25.0, 21.5. The spectra data are in accordance with those reported in the literature.<sup>[7]</sup>

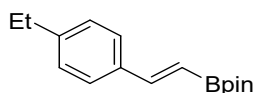

**(E)-2-(4-ethylstyryl)-4,4,5,5-tetramethyl-1,3,2-dioxaborolane (3c)**

The representative procedure was followed using 4-Ethylphenylacetylene (**1c**) (39 mg, 0.30 mmol). Purification by column chromatography (eluent: Petroleum ether: Ethyl acetate = 10:1) yielded **3c** (48 mg, 62%) as a colorless oil. <sup>1</sup>H NMR (400 MHz, CDCl<sub>3</sub>) δ 7.41 (d, *J* = 8.0 Hz, 2H), 7.38 (d, *J* = 18.4 Hz, 1H), 7.17 (d, *J* = 8.0 Hz, 2H), 6.11 (d, *J* = 18.4 Hz, 1H), 2.64 (q, *J* = 7.6 Hz, 2H), 1.31 (s, 12H), 1.23 (t, *J* = 7.6 Hz, 3H). <sup>13</sup>C NMR (101 MHz, CDCl<sub>3</sub>) δ 149.7, 145.5, 135.2, 128.2, 127.3, 83.4, 77.4, 28.8, 25.0, 15.5. The spectra data are in accordance with those reported in the literature. [10]

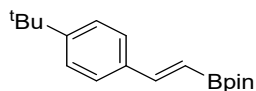

**(E)-2-(4-(*tert*-butyl)styryl)-4,4,5,5-tetramethyl-1,3,2-dioxaborolane (**3d**)**

The representative procedure was followed using 4-(*tert*-butyl)phenylacetylene (**1d**) (47 mg, 0.30 mmol). Purification by column chromatography (eluent: Petroleum ether: Ethyl acetate = 10:1) yielded **3d** (74 mg, 86%) as a colorless oil. <sup>1</sup>H NMR (400 MHz, CDCl<sub>3</sub>) δ 7.43 (d, *J* = 8.4 Hz, 2H), 7.39 (d, *J* = 18.4 Hz, 1H), 7.36 (d, *J* = 8.4 Hz, 2H), 6.12 (d, *J* = 18.4 Hz, 1H), 1.32 (s, 21H). <sup>13</sup>C NMR (101 MHz, CDCl<sub>3</sub>) δ 152.3, 149.5, 134.9, 127.0, 125.6, 83.4, 77.4, 34.8, 31.4, 25.0. The spectra data are in accordance with those reported in the literature. [7]

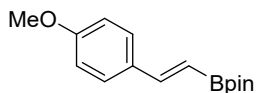

**(E)-2-(4-methoxystyryl)-4,4,5,5-tetramethyl-1,3,2-dioxaborolane (**3e**)**

The representative procedure was followed using 4-Ethynylanisole (**1e**) (40 mg, 0.30 mmol). Purification by column chromatography (eluent: Petroleum ether: Ethyl acetate = 10:1) yielded **3e** (63 mg, 81%) as a colorless oil. <sup>1</sup>H NMR (400 MHz, CDCl<sub>3</sub>) δ 7.44 (d, *J* = 8.8 Hz, 2H), 7.35 (d, *J*



= 18.4 Hz, 1H), 6.86 (d,  $J = 8.4$  Hz, 2H), 6.01 (d,  $J = 18.4$  Hz, 1H), 3.81 (s, 3H), 1.31 (s, 12H).  $^{13}\text{C}$  NMR (101 MHz,  $\text{CDCl}_3$ )  $\delta$  160.4, 149.2, 130.6, 128.6, 114.1, 83.4, 77.4, 55.4, 25.0. The spectra data are in accordance with those reported in the literature. <sup>[10]</sup>

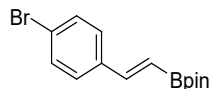

**(E)-2-(4-bromostyryl)-4,4,5,5-tetramethyl-1,3,2-dioxaborolane (3f)**

The representative procedure was followed using 4-Bromophenylacetylene (**1f**) (54 mg, 0.30 mmol). Purification by column chromatography (eluent: Petroleum ether: Ethyl acetate = 10:1) yielded **3f** (51 mg, 55%) as a colorless oil.  $^1\text{H}$  NMR (400 MHz,  $\text{CDCl}_3$ )  $\delta$  7.46 (d,  $J = 8.4$  Hz, 2H), 7.34 (d,  $J = 8.4$  Hz, 2H), 7.31 (d,  $J = 14.0$  Hz, 1H), 6.15 (d,  $J = 18.4$  Hz, 1H), 1.31 (s, 12H).  $^{13}\text{C}$  NMR (101 MHz,  $\text{CDCl}_3$ )  $\delta$  148.2, 136.5, 131.9, 128.7, 123.1, 83.6, 77.37, 25.0. The spectra data are in accordance with those reported in the literature. <sup>[10]</sup>

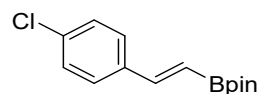

**(E)-2-(4-chlorostyryl)-4,4,5,5-tetramethyl-1,3,2-dioxaborolane (3g)**

The representative procedure was followed using 4-Chlorophenylacetylene (**1g**) (41 mg, 0.30 mmol). Purification by column chromatography (eluent: Petroleum ether: Ethyl acetate = 10:1) yielded **3g** (66 mg, 83%) as a colorless oil.  $^1\text{H}$  NMR (400 MHz,  $\text{CDCl}_3$ )  $\delta$  7.41 (d,  $J = 8.4$  Hz, 2H), 7.33 (d,  $J = 18.4$  Hz, 3H), 7.30 (s, 1H), 6.13 (d,  $J = 18.4$  Hz, 1H), 1.31 (s, 12H).  $^{13}\text{C}$  NMR (101 MHz,  $\text{CDCl}_3$ )  $\delta$  148.2, 136.1, 134.8, 128.9, 128.4, 83.6, 77.4, 25.0. The spectra data are in accordance with those reported in the literature. <sup>[10]</sup>

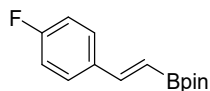

**(E)-2-(4-fluorostyryl)-4,4,5,5-tetramethyl-1,3,2-dioxaborolane (3h)**

The representative procedure was followed using 4-Fluorophenylacetylene (**1h**) (36 mg, 0.30 mmol). Purification by column chromatography (eluent: Petroleum ether: Ethyl acetate = 10:1) yielded **3h** (65 mg, 88%) as a colorless oil. <sup>1</sup>H NMR (400 MHz, CDCl<sub>3</sub>) δ 7.46 (dd, *J* = 8.8, 5.6 Hz, 2H), 7.35 (d, *J* = 18.4 Hz, 1H), 7.02 (t, *J* = 8.8 Hz, 2H), 6.07 (d, *J* = 18.4 Hz, 1H), 1.31 (s, 12H). <sup>13</sup>C NMR (101 MHz, CDCl<sub>3</sub>) δ 164.5, 162.1, 148.3, 133.9 (d, *J* = 3.0 Hz), 128.9 (d, *J* = 8.0 Hz), 115.7 (d, *J* = 22.2 Hz), 83.5, 77.5, 25.0. The spectra data are in accordance with those reported in the literature. <sup>[10]</sup>

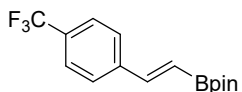

**(E)-4,4,5,5-tetramethyl-2-(4-(trifluoromethyl)styryl)-1,3,2-dioxaborolane (3i)**

The representative procedure was followed using 1-ethynyl-4-(trifluoromethyl)benzene (**1i**) (51.2 mg, 0.30 mmol). Purification by column chromatography (eluent: Petroleum ether: Ethyl acetate = 10:1) yielded **3i** (49.4 mg, 94%) as a colorless oil. <sup>1</sup>H NMR (400 MHz, CDCl<sub>3</sub>) δ 7.61 – 7.52 (m, 4H), 7.40 (d, *J* = 18.4 Hz, 1H), 6.25 (d, *J* = 18.4 Hz, 1H), 1.31 (s, 12H). <sup>13</sup>C NMR (101 MHz, CDCl<sub>3</sub>) δ 147.7, 140.9, 130.58 (q, *J* = 32.4 Hz), 127.2, 125.67 (q, *J* = 3.8 Hz), 121.52 (q, *J* = 271.9 Hz), 83.7, 24.9. The spectra data are in accordance with those reported in the literature. <sup>[7]</sup>

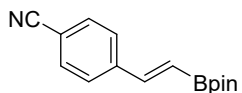

**(E)-4-(2-(4,4,5,5-tetramethyl-1,3,2-dioxaborolan-2-yl)vinyl)benzonitrile (3j)**

The representative procedure was followed using 4-ethynylbenzonitrile (**1j**) (38.1 mg, 0.30 mmol). Purification by column chromatography (eluent: Petroleum ether: Ethyl acetate = 10:1) yielded **3j** (50.4 mg, 66%) as a colorless oil. <sup>1</sup>H NMR (400 MHz, CDCl<sub>3</sub>) δ 7.66 – 7.51 (m, 4H), 7.36 (d, *J* = 18.4 Hz, 1H), 6.27 (d, *J* = 18.4 Hz, 1H), 1.31 (s, 12H). <sup>13</sup>C NMR (101 MHz, CDCl<sub>3</sub>) δ 147.2, 141.7, 132.5, 127.5, 118.9, 112.1, 83.8, 24.9. The spectra data are in accordance with those reported in the literature. [6]

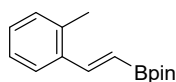

**(E)-4,4,5,5-tetramethyl-2-(2-methylstyryl)-1,3,2-dioxaborolane (3k)**

The representative procedure was followed using 1-ethynyl-2-methylbenzene (**1k**) (34.8 mg, 0.30 mmol). Purification by column chromatography (eluent: Petroleum ether: Ethyl acetate = 10:1) yielded **3k** (62.9 mg, 86%) as a colorless oil. <sup>1</sup>H NMR (400 MHz, CDCl<sub>3</sub>) δ 7.67 (d, *J* = 18.3 Hz, 1H), 7.60 – 7.53 (m, 1H), 7.24 – 7.10 (m, 3H), 6.10 (d, *J* = 18.3 Hz, 1H), 2.43 (s, 3H), 1.33 (s, 12H). <sup>13</sup>C NMR (101 MHz, CDCl<sub>3</sub>) δ 147.2, 136.7, 136.3, 130.5, 128.6, 126.2, 125.8, 83.4, 24.9, 19.9. The spectra data are in accordance with those reported in the literature. [10]

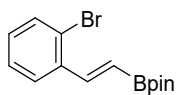

**(E)-2-(2-bromostyryl)-4,4,5,5-tetramethyl-1,3,2-dioxaborolane (3l)**

The representative procedure was followed using 1-ethynyl-2-bromobenzene (**1l**) (54.1 mg, 0.30 mmol). Purification by column chromatography (eluent: Petroleum ether: Ethyl acetate = 10:1) yielded **3l** (69.3 mg, 75%) as a colorless oil. <sup>1</sup>H NMR (400 MHz, CDCl<sub>3</sub>) δ 7.72 – 7.51 (m, 2H), 7.29 – 7.04 (m, 3H), 6.10 (d, *J* = 18.3 Hz, 1H), 1.33 (s, 12H). <sup>13</sup>C NMR (101 MHz, CDCl<sub>3</sub>) δ 149.1,

137.8, 128.8, 127.4, 126.1, 83.4, 24.8. The spectra data are in accordance with those reported in the literature. [11]

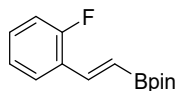

**(E)-2-(2-fluorostyryl)-4,4,5,5-tetramethyl-1,3,2-dioxaborolane (3m)**

The representative procedure was followed using 1-ethynyl-2-fluorobenzene (1m) (36.2 mg, 0.30 mmol). Purification by column chromatography (eluent: Petroleum ether: Ethyl acetate = 10:1) yielded 3m (61.3 mg, 82%) as a colorless oil. <sup>1</sup>H NMR (400 MHz, CDCl<sub>3</sub>) δ 7.64 – 7.52 (m, 2H), 7.28 – 7.18 (m, 1H), 7.09 (t, *J* = 7.5 Hz, 1H), 7.02 (t, *J* = 8.2 Hz, 1H), 6.24 (d, *J* = 18.6 Hz, 1H), 1.30 (s, 12H). <sup>13</sup>C NMR (101 MHz, CDCl<sub>3</sub>) δ 160.7 (d, *J* = 251.6 Hz), 141.3 (d, *J* = 4.1 Hz), 130.2 (d, *J* = 8.5 Hz), 127.4 (d, *J* = 3.3 Hz), 125.4 (d, *J* = 11.7 Hz), 124.1 (d, *J* = 3.6 Hz), 115.8 (d, *J* = 22.1 Hz), 83.4, 24.8. The spectra data are in accordance with those reported in the literature. [7]

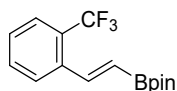

**(E)-4,4,5,5-tetramethyl-2-(2-(trifluoromethyl)styryl)-1,3,2-dioxaborolane (3n)**

The representative procedure was followed using 1-ethynyl-2-(trifluoromethyl)benzene (1n) (51.1 mg, 0.30 mmol). Purification by column chromatography (eluent: Petroleum ether: Ethyl acetate = 10:1) yielded 3n (81.6 mg, 91%) as a colorless oil. <sup>1</sup>H NMR (400 MHz, CDCl<sub>3</sub>) δ 7.80 – 7.59 (m, 3H), 7.51 (t, *J* = 7.6 Hz, 1H), 7.37 (t, *J* = 7.6 Hz, 1H), 6.16 (d, *J* = 18.1 Hz, 1H), 1.31 (s, 12H). <sup>13</sup>C NMR (101 MHz, CDCl<sub>3</sub>) δ 144.8 (d, *J* = 2.0 Hz), 137.0, 132.0, 128.3, 127.9(q, 30.1 Hz), 127.6,

125.8(q, 5.7 Hz), 124.8 (q, 274.0 Hz), 83.6, 24.9. The spectra data are in accordance with those reported in the literature. [6]

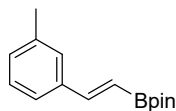

**(E)-4,4,5,5-tetramethyl-2-(3-methylstyryl)-1,3,2-dioxaborolane (3o)**

The representative procedure was followed using 1-ethynyl-3-methylbenzene (1o) (34.8 mg, 0.30 mmol). Purification by column chromatography (eluent: Petroleum ether: Ethyl acetate = 10:1) yielded 3o (65.2 mg, 89%) as a colorless oil. <sup>1</sup>H NMR (400 MHz, CDCl<sub>3</sub>) δ 7.35 (d, J = 18.4 Hz, 1H), 7.30 – 7.25 (m, 2H), 7.19 (t, J = 7.8 Hz, 1H), 7.08 (d, J = 7.4 Hz, 1H), 6.13 (d, J = 18.4 Hz, 1H), 2.32 (s, 3H), 1.28 (s, 12H). <sup>13</sup>C NMR (101 MHz, CDCl<sub>3</sub>) δ 149.7, 138.1, 137.5, 129.8, 128.5, 127.8, 124.3, 83.4, 24.9, 21.4. The spectra data are in accordance with those reported in the literature. [10]

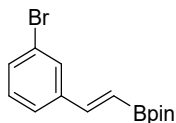

**(E)-2-(3-bromostyryl)-4,4,5,5-tetramethyl-1,3,2-dioxaborolane (3p)**

The representative procedure was followed using 1-ethynyl-3-bromobenzene (1p) (53.7 mg, 0.30 mmol). Purification by column chromatography (eluent: Petroleum ether: Ethyl acetate = 10:1) yielded 3p (74.8 mg, 81%) as a colorless oil. <sup>1</sup>H NMR (400 MHz, CDCl<sub>3</sub>) δ 7.61 (s, 1H), 7.43 – 7.36 (m, 2H), 7.30 (d, J = 18.4 Hz, 1H), 7.20 (t, J = 7.8 Hz, 1H), 6.16 (d, J = 18.4 Hz, 1H), 1.31

(s, 12H)..  $^{13}\text{C}$  NMR (101 MHz,  $\text{CDCl}_3$ )  $\delta$  147.9, 139.4, 134.6, 129.9, 128.8, 127.0, 125.3, 83.6, 24.9. The spectra data are in accordance with those reported in the literature. <sup>[11]</sup>

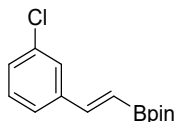

**(E)-2-(3-chlorostyryl)-4,4,5,5-tetramethyl-1,3,2-dioxaborolane (3q)**

The representative procedure was followed using 1-ethynyl-3-chlorobenzene (**1q**) (40.8 mg, 0.30 mmol). Purification by column chromatography (eluent: Petroleum ether: Ethyl acetate = 10:1) yielded **3q** (65.7 mg, 83%) as a colorless oil.  $^1\text{H}$  NMR (400 MHz,  $\text{CDCl}_3$ )  $\delta$  7.52 (s, 1H), 7.43 – 7.38 (m, 1H), 7.36 (s, 1H), 7.34 – 7.30 (m, 2H), 6.24 (d,  $J = 18.4$  Hz, 1H), 1.38 (s, 12H).  $^{13}\text{C}$  NMR (101 MHz,  $\text{CDCl}_3$ )  $\delta$  143.2, 141.3, 126.2, 125.1, 124.9, 83.4, 24.9. The spectra data are in accordance with those reported in the literature. <sup>[7]</sup>

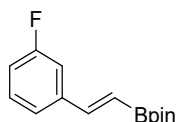

**(E)-2-(3-fluorostyryl)-4,4,5,5-tetramethyl-1,3,2-dioxaborolane (3r)**

The representative procedure was followed using 1-ethynyl-3-fluorobenzene (**1r**) (36.2 mg, 0.30 mmol). Purification by column chromatography (eluent: Petroleum ether: Ethyl acetate = 10:1) yielded **3r** (65.1 mg, 87%) as a colorless oil.  $^1\text{H}$  NMR (400 MHz,  $\text{CDCl}_3$ )  $\delta$  7.21 (s, 1H), 7.19 – 7.02 (m, 3H), 6.89 – 6.79 (m, 2H), 6.06 (d,  $J = 18.4$  Hz, 1H), 1.18 (s, 12H).  $^{13}\text{C}$  NMR (101 MHz,  $\text{CDCl}_3$ )  $\delta$  162.9 (d,  $J = 245.6$  Hz), 147.8, 139.8 (d,  $J = 7.4$  Hz), 129.8 (d,  $J = 8.2$  Hz), 122.8 (d,  $J = 2.6$  Hz), 115.4 (d,  $J = 21.5$  Hz), 113.1 (d,  $J = 21.6$  Hz), 83.2, 24.6. The spectra data are in accordance with those reported in the literature. <sup>[12]</sup>

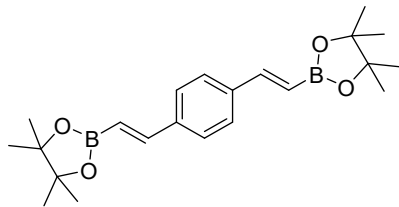

### 1,4-bis((*E*)-2-(4,4,5,5-tetramethyl-1,3,2-dioxaborolan-2-yl)vinyl)benzene (3s)

The representative procedure was followed using 1,4-diethynylbenzene (1s) (37.9 mg, 0.30 mmol). Purification by column chromatography (eluent: Petroleum ether: Ethyl acetate = 10:1) yielded 3s (104.2 mg, 91%) as a white solid.  $^1\text{H}$  NMR (400 MHz,  $\text{CDCl}_3$ )  $\delta$  7.44 (s, 4H), 7.36 (d,  $J = 18.4$  Hz, 2H), 6.16 (d,  $J = 18.4$  Hz, 2H), 1.29 (s, 24H).  $^{13}\text{C}$  NMR (101 MHz,  $\text{CDCl}_3$ )  $\delta$ .148.8, 138.0, 130.1, 127.3, 83.4, 24.8. The spectra data are in accordance with those reported in the literature.

[13]

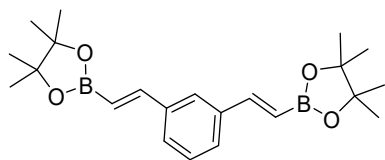

### 1,3-bis((*E*)-2-(4,4,5,5-tetramethyl-1,3,2-dioxaborolan-2-yl)vinyl)benzene (3t)

The representative procedure was followed using 1,3-diethynylbenzene (1t) (38.1 mg, 0.30 mmol). Purification by column chromatography (eluent: Petroleum ether: Ethyl acetate = 10:1) yielded 3t (104.6 mg, 92%) as a white solid.  $^1\text{H}$  NMR (400 MHz,  $\text{CDCl}_3$ )  $\delta$  7.55 (s, 1H), 7.44 – 7.33 (m, 4H), 7.32 – 7.26 (m, 1H), 6.15 (d,  $J = 18.4$  Hz, 2H), 1.29 (s, 24H);  $^{13}\text{C}$  NMR (101 MHz,  $\text{CDCl}_3$ )  $\delta$ .149.2, 137.8, 128.9, 127.4, 126.2, 83.4, 24.9. The spectra data are in accordance with those reported in the literature. [14]

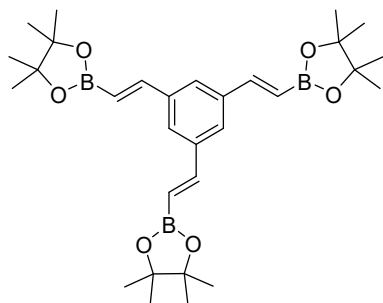

**1,3,5-tris((*E*)-2-(4,4,5,5-tetramethyl-1,3,2-dioxaborolan-2-yl)vinyl)benzene (3u)**

The representative procedure was followed using 1,3,5-triethynylbenzene (**1u**) (45.1 mg, 0.30 mmol). Purification by column chromatography (eluent: Petroleum ether: Ethyl acetate = 10:1) yielded **3u** (126.4 mg, 79 %) as a white solid. <sup>1</sup>H NMR (400 MHz, CDCl<sub>3</sub>) δ 7.52 (s, 3H), 7.36 (d, *J* = 18.5 Hz, 3H), 6.16 (d, *J* = 18.5 Hz, 3H), 1.30 (s, 36H). <sup>13</sup>C NMR (101 MHz, CDCl<sub>3</sub>) δ 148.9, 138.1, 126.2, 83.5, 24.9. The spectra data are in accordance with those reported in the literature.

[15]

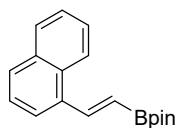

**(*E*)-4,4,5,5-tetramethyl-2-(2-(naphthalen-1-yl)vinyl)-1,3,2-dioxaborolane (3v)**

The representative procedure was followed using 1-ethynyl-naphthalene (**1v**) (45.6 mg, 0.30 mmol). Purification by column chromatography (eluent: Petroleum ether: Ethyl acetate = 10:1) yielded **3v** (69.8 mg, 83%) as a colorless oil. <sup>1</sup>H NMR (400 MHz, CDCl<sub>3</sub>) δ 8.15 – 8.05 (m, 2H), 7.68 – 7.55 (m, 3H), 7.37 – 7.24 (m, 3H), 6.16 (d, *J* = 18.1 Hz, 1H), 1.18 (s, 12H). <sup>13</sup>C NMR (101 MHz, CDCl<sub>3</sub>) δ 146.4, 135.2, 133.6, 131.1, 129.0, 128.4, 126.1, 125.7, 125.5, 124.0, 123.7, 83.4, 24.8. The spectra data are in accordance with those reported in the literature. [15]



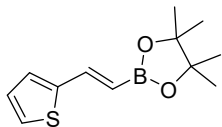

**(E)-4,4,5,5-tetramethyl-2-(2-(thiophen-2-yl)vinyl)-1,3,2-dioxaborolane (3w)**

The representative procedure was followed using 2-ethynylthiophene (**1w**) (32.5 mg, 0.30 mmol). Purification by column chromatography (eluent: Petroleum ether: Ethyl acetate = 10:1) yielded **3w** (55.9 mg, 79%) as a brown oil. <sup>1</sup>H NMR (400 MHz, CDCl<sub>3</sub>) δ 7.47 (d, *J* = 18.1 Hz, 1H), 7.24 (d, *J* = 5.0 Hz, 1H), 7.08 (d, *J* = 3.3 Hz, 1H), 7.01 – 6.95 (m, 1H), 5.91 (d, *J* = 18.1 Hz, 1H), 1.30 (s, 12H). <sup>13</sup>C NMR (101 MHz, CDCl<sub>3</sub>) δ 148.1, 144.0, 141.9, 127.8, 127.7, 126.4, 83.5, 24.9. The spectra data are in accordance with those reported in the literature. [7]

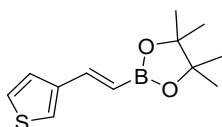

**(E)-4,4,5,5-tetramethyl-2-(2-(thiophen-3-yl)vinyl)-1,3,2-dioxaborolane (3x)**

The representative procedure was followed using 3-ethynylthiophene (**1x**) (32.6 mg, 0.30 mmol). Purification by column chromatography (eluent: Petroleum ether: Ethyl acetate = 10:1) yielded **3x** (58.7 mg, 84 %) as a brown oil. <sup>1</sup>H NMR (400 MHz, CDCl<sub>3</sub>) δ 7.40 (d, *J* = 18.4 Hz, 1H), 7.33 – 7.30 (m, 2H), 7.28 – 7.25 (m, 1H), 5.96 (d, *J* = 18.3 Hz, 1H), 1.32 (s, 12H). <sup>13</sup>C NMR (101 MHz, CDCl<sub>3</sub>) δ 143.2, 141.3, 126.2, 125.1, 124.9, 83.4, 24.9. The spectra data are in accordance with those reported in the literature. [15]

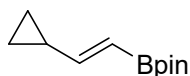

**(E)-2-(2-cyclopropylvinyl)-4,4,5,5-tetramethyl-1,3,2-dioxaborolane (3y)**

The representative procedure was followed using Cyclopropyl acetylene (**1y**) (20 mg, 0.30 mmol). Purification by column chromatography (eluent: Petroleum ether: Ethyl acetate = 10:1) yielded **5-3y** (52 mg, 89%) as a colorless oil. <sup>1</sup>H NMR (400 MHz, CDCl<sub>3</sub>) δ 6.08 (dd, *J* = 18.0, 9.2 Hz, 1H), 5.49 (d, *J* = 18.0 Hz, 1H), 1.46-1.55 (m, 1H), 1.25 (s, 12H), 0.84-0.75 (m, 2H), 0.60-0.48 (m, 2H). <sup>13</sup>C NMR (101 MHz, CDCl<sub>3</sub>) δ 158.7, 83.1, 77.4, 24.9, 17.2, 8.0. The spectra data are in accordance with those reported in the literature. [6]

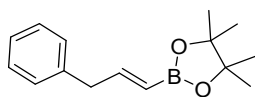

**(E)-4,4,5,5-tetramethyl-2-(3-phenylprop-1-en-1-yl)-1,3,2-dioxaborolane (3z)**

The representative procedure was followed using prop-2-yn-1-ylbenzene (**1z**) (34.9 mg, 0.30 mmol). Purification by column chromatography (eluent: Petroleum ether: Ethyl acetate = 10:1) yielded **3z** (60.8 mg, 87%) as a colorless oil. <sup>1</sup>H NMR (400 MHz, CDCl<sub>3</sub>) δ 7.38 – 7.13 (m, 5H), 6.86 – 6.71 (m, 1H), 5.47 (d, *J* = 17.8 Hz, 1H), 3.49 (d, *J* = 6.3 Hz, 2H), 1.27 (s, 12H). <sup>13</sup>C NMR (101 MHz, CDCl<sub>3</sub>) δ 152.5, 139.1, 129.0, 128.5, 126.2, 83.2, 42.4, 24.9. The spectra data are in accordance with those reported in the literature. [16]

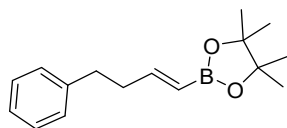

**(E)-4,4,5,5-tetramethyl-2-(4-phenylbut-1-en-1-yl)-1,3,2-dioxaborolane (3a')**

The representative procedure was followed using but-3-yn-1-ylbenzene (**1a'**) (39.1 mg, 0.30 mmol). Purification by column chromatography (eluent: Petroleum ether: Ethyl acetate = 10:1) yielded **3a'** (64.6 mg, 83%) as a colorless oil. <sup>1</sup>H NMR (400 MHz, CDCl<sub>3</sub>) δ 7.34 – 7.25 (m, 2H), 7.21 (d, *J* = 7.2 Hz, 3H), 6.82 – 6.65 (m, 1H), 5.54 (d, *J* = 18.0 Hz, 1H), 2.77 (d, *J* = 8.5 Hz, 2H),

2.50 (q,  $J = 7.1, 6.5$  Hz, 2H), 1.29 (s, 12H).  $^{13}\text{C}$  NMR (101 MHz,  $\text{CDCl}_3$ )  $\delta$ .153.4, 141.7, 128.3, 125.9, 83.1, 37.5, 34.6, 24.8. The spectra data are in accordance with those reported in the literature. <sup>[11]</sup>

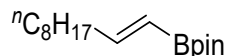

### **(E)-2-(dec-1-en-1-yl)-4,4,5,5-tetramethyl-1,3,2-dioxaborolane (3b')**

The representative procedure was followed using 1-Decyne (**1b'**) (41 mg, 0.30 mmol). Purification by column chromatography (eluent: Petroleum ether: Ethyl acetate = 10:1) yielded **3b'** (69 mg, 86%) as a colorless oil.  $^1\text{H}$  NMR (400 MHz,  $\text{CDCl}_3$ )  $\delta$  6.63 (dt,  $J = 18.0, 6.4$  Hz, 1H), 5.42 (dt,  $J = 18.0, 6.4$  Hz, 1H), 2.10-2.18 (m, 2H), 1.37-1.44 (m, 2H), 1.26 (s, 20H), 0.87 (t,  $J = 7.2$  Hz, 3H), 0.10-0.04 (m, 2H).  $^{13}\text{C}$  NMR (101 MHz,  $\text{CDCl}_3$ )  $\delta$  155.0, 83.1, 77.4, 36.0, 32.0, 29.6, 29.4, 28.4, 24.9, 22.8, 14.3, 1.2. The spectra data are in accordance with those reported in the literature. <sup>[17]</sup>

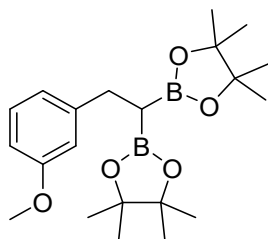

### **2,2'-(2-(3-methoxyphenyl)ethane-1,1-diyl)bis(4,4,5,5-tetramethyl-1,3,2-dioxaborolane) (3c')**

The representative procedure was followed using 1-ethynyl-3-methoxybenzene (**1c'**) (39.6 mg, 0.30 mmol). Purification by column chromatography (eluent: Petroleum ether: Ethyl acetate = 10:1) yielded **3c'** (110.3 mg, 95 %) as a brown oil.  $^1\text{H}$  NMR (400 MHz,  $\text{CDCl}_3$ )  $\delta$  7.12 (t,  $J = 7.9$  Hz, 1H), 6.85 – 6.76 (m, 2H), 6.70 – 6.59 (m, 1H), 3.75 (s, 3H), 2.85 (d,  $J = 8.3$  Hz, 2H), 1.24 – 0.98 (m, 24H).  $^{13}\text{C}$  NMR (101 MHz,  $\text{CDCl}_3$ )  $\delta$  159.4, 146.1, 128.9, 120.7, 113.7, 111.1, 83.1, 55.0, 31.4, 24.8, 24.5. The spectra data are in accordance with those reported in the literature. <sup>[18]</sup>

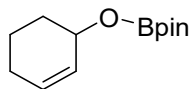

### 2-(cyclohex-2-en-1-yloxy)-4,4,5,5-tetramethyl-1,3,2-dioxaborolane (5)

The representative procedure was followed using cyclohex-2-en-1-one (4) (28.8 mg, 0.30 mmol). Purification by column chromatography (eluent: Petroleum ether: Ethyl acetate = 10:1) yielded **5** (34.28 mg, 51 %) as a colorless oil.  $^1\text{H}$  NMR (400 MHz,  $\text{CDCl}_3$ )  $\delta$  6.03 – 5.56 (m, 2H), 4.17 (s, 1H), 2.07 – 1.42 (m, 6H), 1.23 (s, 12H).  $^{13}\text{C}$  NMR (101 MHz,  $\text{CDCl}_3$ )  $\delta$  130.5, 130.0, 83.4, 65.5, 32.0, 25.1, 24.8, 19. The spectra data are in accordance with those reported in the literature. [19]

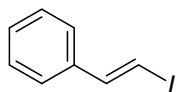

### (E)-(2-iodovinyl)benzene (3-1)

The representative procedure was followed using (*E*)-4,4,5,5-tetramethyl-2-styryl-1,3,2-dioxaborolane (**3a**) (69 mg, 0.30 mmol). Purification by column chromatography (eluent: Petroleum ether: Ethyl acetate = 10:1) yielded **3-1** (59.3 mg, 86%) as a yellow oil.  $^1\text{H}$  NMR (400 MHz,  $\text{CDCl}_3$ )  $\delta$  7.33 (d,  $J$  = 14.9 Hz, 1H), 7.25 – 7.14 (m, 5H), 6.72 (d,  $J$  = 14.9 Hz, 1H).  $^{13}\text{C}$  NMR (101 MHz,  $\text{CDCl}_3$ )  $\delta$  144.9, 137.6, 128.7, 128.3, 126.0, 76.7. The spectra data are in accordance with those reported in the literature. [7]

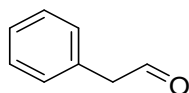

### 2-phenylacetaldehyde (3-2)

The representative procedure was followed using (*E*)-4,4,5,5-tetramethyl-2-styryl-1,3,2-dioxaborolane (**3a**) (69 mg, 0.30 mmol). Purification by column chromatography (eluent:

Petroleum ether: Ethyl acetate = 10:1) yielded **3-2** (34.6 mg, 96%) as a yellow oil. <sup>1</sup>H NMR (400 MHz, CDCl<sub>3</sub>) δ 9.66 (s, 1H), 7.48 – 7.41 (m, 2H), 7.37 – 7.30 (m, 1H), 7.25 – 7.12 (m, 2H), 3.70 (d, *J* = 7.6 Hz, 2H). <sup>13</sup>C NMR (101 MHz, CDCl<sub>3</sub>) δ 193.6, 129.6, 129.0, 128.6, 128.5, 35.9. The spectra data are in accordance with those reported in the literature. [7]

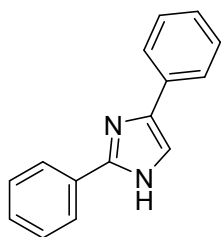

### 2,5-diphenyl-1*H*-imidazole (**3-3**)

The representative procedure was followed using (*E*)-4,4,5,5-tetramethyl-2-styryl-1,3,2-dioxaborolane (**3a**) (69 mg, 0.30 mmol). Purification by column chromatography (eluent: Petroleum ether: Ethyl acetate = 10:1) yielded **3-3** (51.3 mg, 51%) as a white solid. <sup>1</sup>H NMR (400 MHz, DMSO-*d*<sub>6</sub>) δ 12.64 (s, 1H), 8.04 (d, *J* = 7.5 Hz, 2H), 7.87 (d, *J* = 7.5 Hz, 2H), 7.72 (s, 1H), 7.51 – 7.43 (m, 2H), 7.43 – 7.32 (m, 3H), 7.22 (t, *J* = 7.3 Hz, 1H). <sup>13</sup>C NMR (101 MHz, DMSO-*d*<sub>6</sub>) δ 146.6, 131.2, 129.2, 129.0, 128.6, 126.8, 125.5, 124.9. The spectra data are in accordance with those reported in the literature. [8]

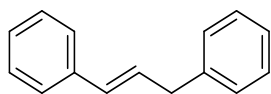

### (*E*)-prop-1-ene-1,3-diylidibenzene (**3-4**)

The representative procedure was followed using (*E*)-4,4,5,5-tetramethyl-2-styryl-1,3,2-dioxaborolane (**3a**) (69 mg, 0.30 mmol). Purification by column chromatography (eluent: Petroleum ether: Ethyl acetate = 10:1) yielded **3-4** (26.19 mg, 45%) as a color oil. <sup>1</sup>H NMR (400

MHz, CDCl<sub>3</sub>)  $\delta$  7.65 – 7.38 (m, 10H), 6.76 – 6.44 (m, 2H), 3.78 (d,  $J$  = 6.5 Hz, 2H). <sup>13</sup>C NMR (101 MHz, CDCl<sub>3</sub>)  $\delta$  140.2, 131.1, 129.2, 128.7, 128.5, 127.1, 126.2(2C), 39.4. The spectra data are in accordance with those reported in the literature. [9]

## 8 References

1. G. Guo, X. Wu, X. Yan, L. Yan, X. Li, S. Zhang and N. Qiu, Unprecedentedly High Activity and/or High Regio-/Stereoselectivity of Fluorenyl-Based CGC Allyl-Type  $\eta^3$ :  $\eta^1$ -tert-Butyl (dimethylfluorenylsilyl) amido Ligated Rare Earth Metal Monoalkyl Complexes in Olefin Polymerization, *Polymers*, 2019, **11**, 836.
2. S. Roy, S. K. Das and B. Chattopadhyay, Cobalt (II)-based Metalloradical Activation of 2-(Diazomethyl) pyridines for Radical Transannulation and Cyclopropanation, *Angew. Chem., Int. Ed.*, 2018, **57**, 2238-2243.
3. W. J. Jang, W. L. Lee, J. H. Moon, J. Y. Lee, and J. Yun, Copper-catalyzed trans-hydroboration of Terminal Aryl Alkynes: Stereodivergent Synthesis of Alkenylboron Compounds, *Org. Lett.*, 2016, **18**, 1390-1393.
4. M. Espinal-Viguri, S. E. Neale, N. T. Coles, S. A. Macgregor and R. L. Webster, Room Temperature Iron-Catalyzed Transfer Hydrogenation and Regioselective Deuteration of Carbon–Carbon Double Bonds, *J. Am. Chem. Soc.*, 2019, **141**, 572-582.
5. P. Ye, Y. Shao, X. Ye, F. Zhang, R. Li, J. Sun and J. Chen, Homoleptic bis (trimethylsilyl) Amides of Yttrium Complexes Catalyzed Hydroboration Reduction of Amides to Amines, *Org. Lett.*, 2020, **22**, 1306-1310.
6. S. Mandal, P. K. Verma and K. Geetharani, Lewis acid catalysis: regioselective hydroboration of alkynes and alkenes promoted by scandium triflate, *Chem. Commun.*, 2018, **54**, 13690-13693.
7. X. Shi, S. Li and L. Wu, H<sub>2</sub>-Acceptorless Dehydrogenative Boration and Transfer Boration of Alkenes Enabled by Zirconium Catalyst, *Angew. Chem., Int. Ed.*, 2019, **58**, 16167-16171.

8. S. D. Pardeshi, P. A. Sathe, K. S. Vadagaonkar and A. C. Chaskar, One-Pot Protocol for the Synthesis of Imidazoles and Quinoxalines using N-Bromosuccinimide, *Adv. Synth. Catal.*, 2017 **359**, 4217-4226.
9. D. Srimani and A. Sarkar, Benzaldimines as Ligands for Palladium in Suzuki–Miyaura Reactions. *Tetrahedron Lett.*, 2008, **49**, 6304-6307.
10. M. Magre, B. Maity, A. Falconnet, L. Cavallo and M. Rueping, Magnesium-Catalyzed Hydroboration of Terminal and Internal Alkynes *Angew. Chem. Int. Ed.*, 2019, **58**, 7025-7029.
11. ; W. Lu and Z.S hen, Direct Synthesis of Alkenylboronates from Alkenes and Pinacol Diboron via Copper Catalysis, *Org. Lett.*, 2018, 21, 142-146.
12. X. Shi, S. Li, L. Wu, H<sub>2</sub>-Acceptorless Dehydrogenative Boration and Transfer Boration of Alkenes Enabled by Zirconium Catalyst, *Angew. Chem., Int. Ed.*, 2019, **58**, 16167-16171.
13. H. E. Ho, N. Asao, Y. Yamamoto and T. Jin, Carboxylic Acid-Catalyzed Highly Efficient and Selective Hydroboration of Alkynes with Pinacolborane, *Org. Lett.*, 2014, 16, 4670-4673.
14. J. Altarejos, D. Sucunza, J. J. Vaquero and J. Carreras, Practical Solvent-Free Microwave-Assisted Hydroboration of Alkynes, *Eur. J. Org. Chem.*, 2020, **20**, 3024-3029.
15. R. Mamidala, V. K. Pandey and A. Rit, A. AgSbF<sub>6</sub>-Catalyzed anti-Markovnikov Hydroboration of Terminal Alkynes, *Chem. Comm.*, 2019, **55**, 989-992.
16. R. Hemelaere, F. Carreaux and B. Carboni, Synthesis of Alkenyl Boronates from Allyl-Substituted Aromatics Using an Olefin Cross-Metathesis Protocol, *J. Org. Chem.*, 2013, **78**, 6786-6792.
17. G. Zhang, S. Li, J. Wu, H. Zeng, Z. Mo, K. Davis, S. Zheng, Highly Efficient and Selective Hydroboration of Terminal and Internal Alkynes Catalysed by a Cobalt (II) Coordination Polymer, *Org. Chem. Front.*, 2019, **6**, 3228-3233.

18. X. Wang, X. Cui, S. Li, Y. Wang, C. Xia, H. Jiao, L. Wu, Zirconium-Catalyzed Atom-Economical Synthesis of 1, 1-Diborylalkanes from Terminal and Internal Alkenes, *Angew. Chem., Int. Ed.*, 2020, **59**, 13608-13612.
19. S. Vijjamari, T. M. O'Denius, B. Yao, A. Kubátová and G. Du, Highly Selective Hydroboration of Carbonyls by a Manganese Catalyst: Insight into the Reaction Mechanism, *Organometallics*, 2020, **39**, 3375-3383.

**9 <sup>1</sup>H-, and <sup>13</sup>C- NMR Spectra:**



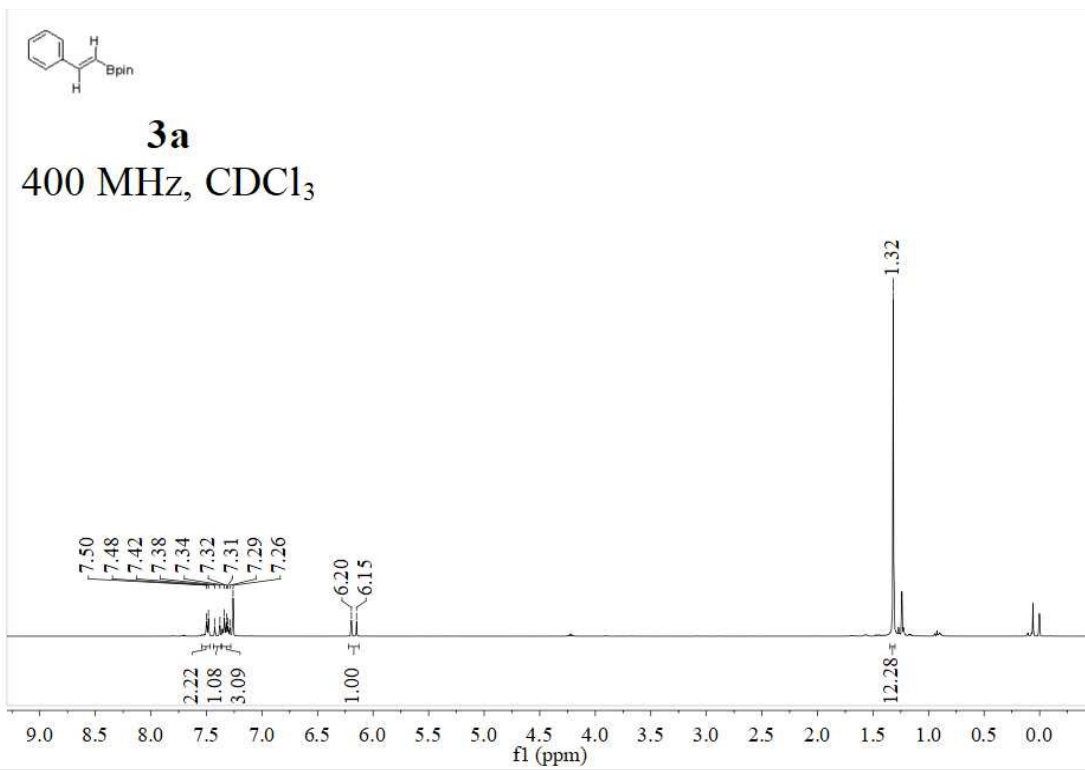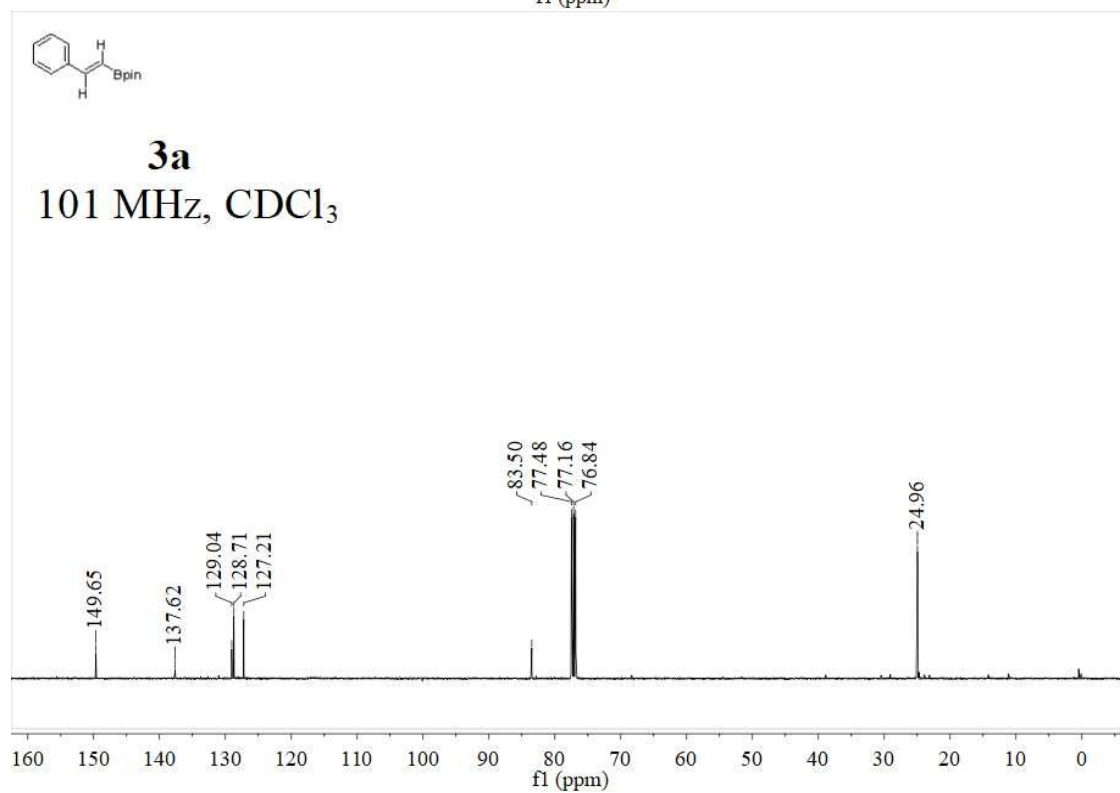

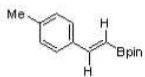

**3b**  
400MHz, CDCl<sub>3</sub>

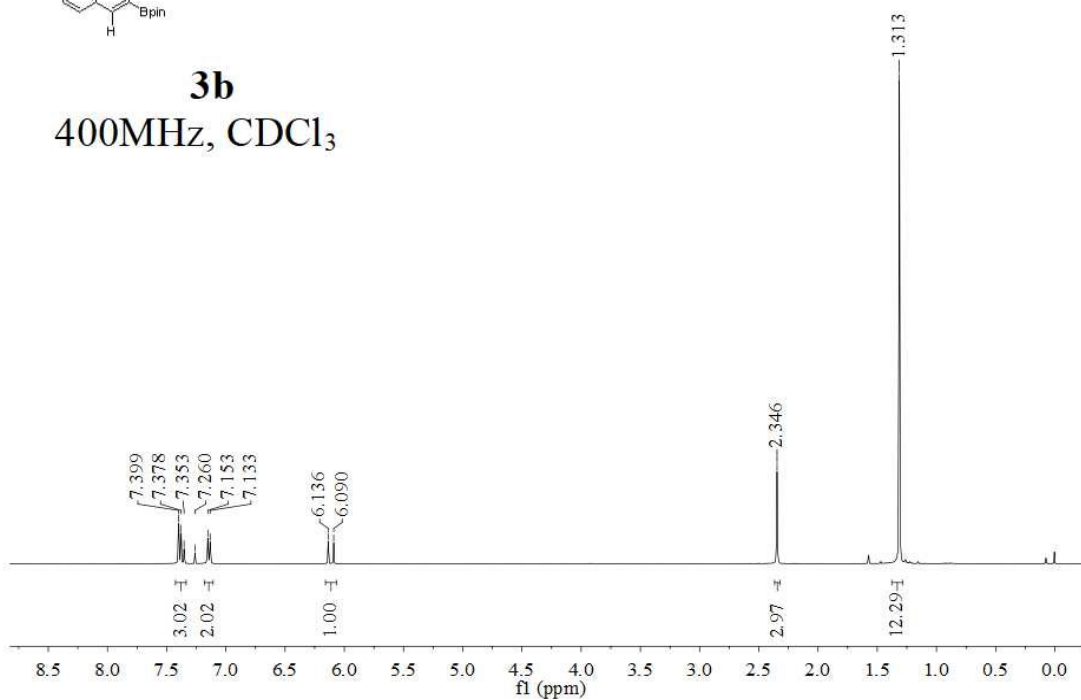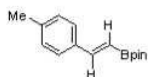

**3b**  
101 MHz, CDCl<sub>3</sub>

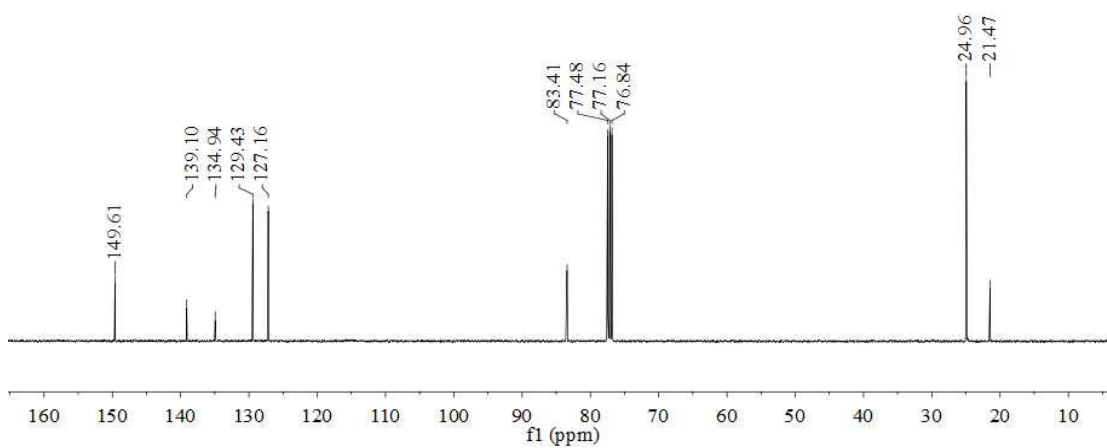

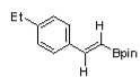

**3c**

400 MHz, CDCl<sub>3</sub>

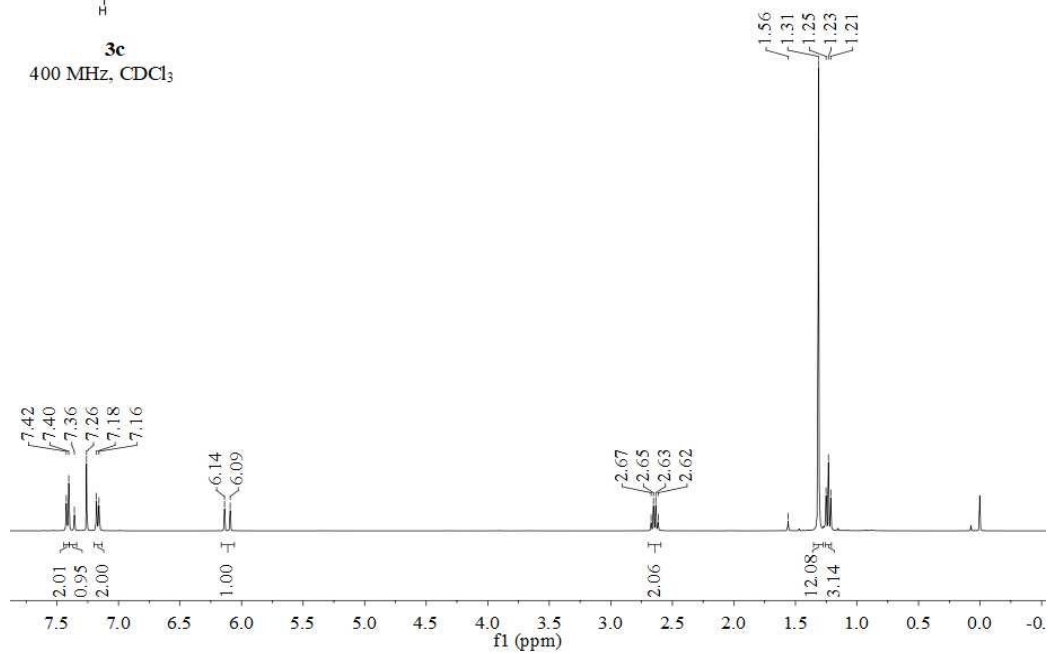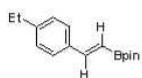

**3c**

101 MHz, CDCl<sub>3</sub>

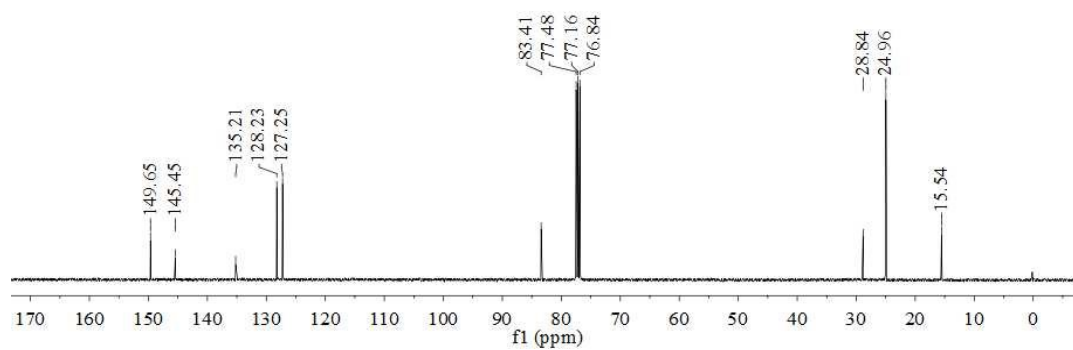

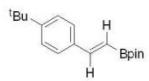

**3d**

400 MHz, CDCl<sub>3</sub>

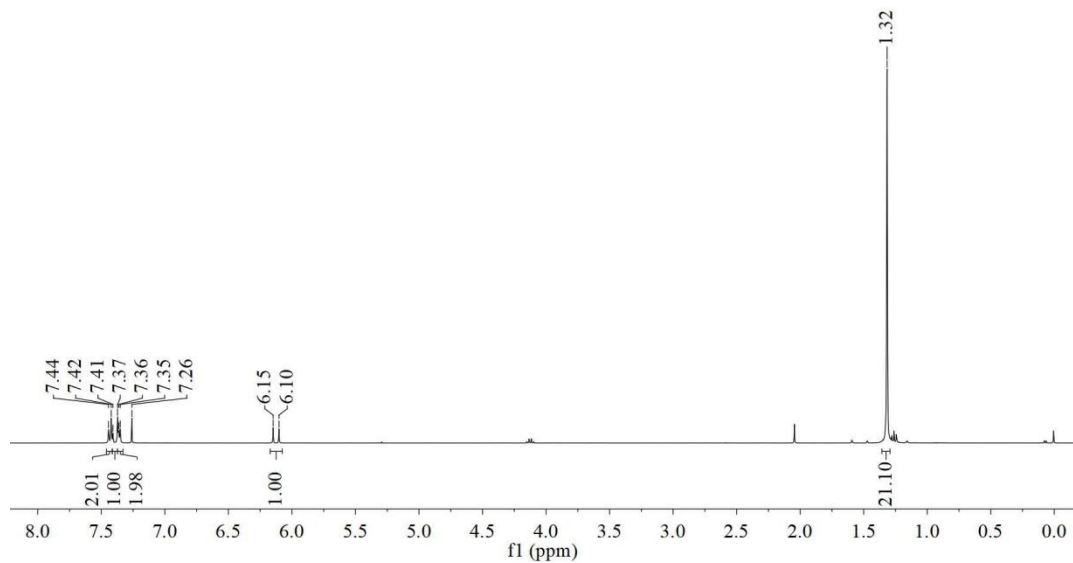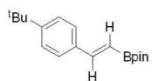

**3d**

101 MHz, CDCl<sub>3</sub>

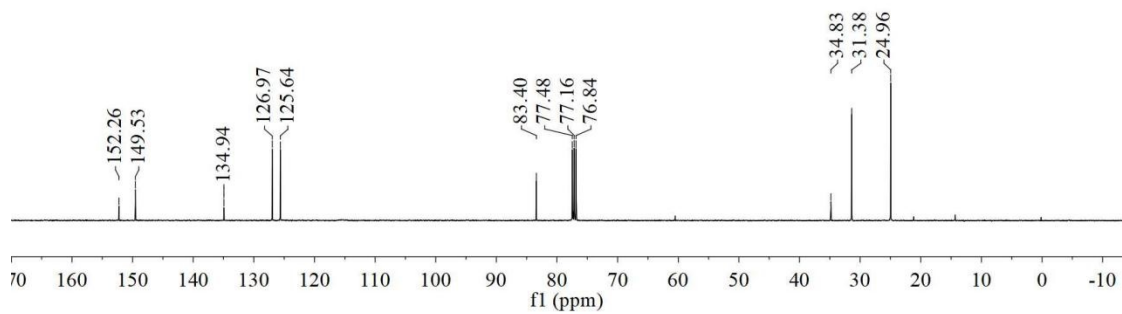

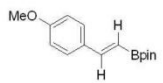

**3e**

400 MHz, CDCl<sub>3</sub>

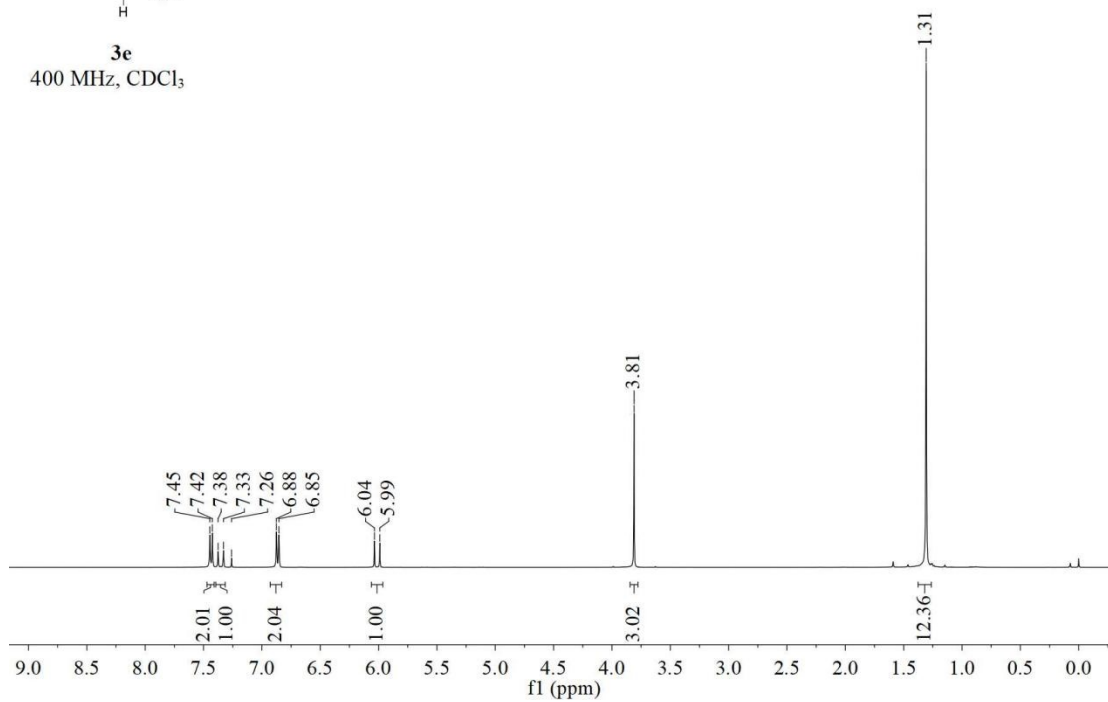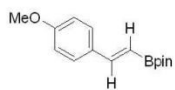

**3e**

101 MHz, CDCl<sub>3</sub>

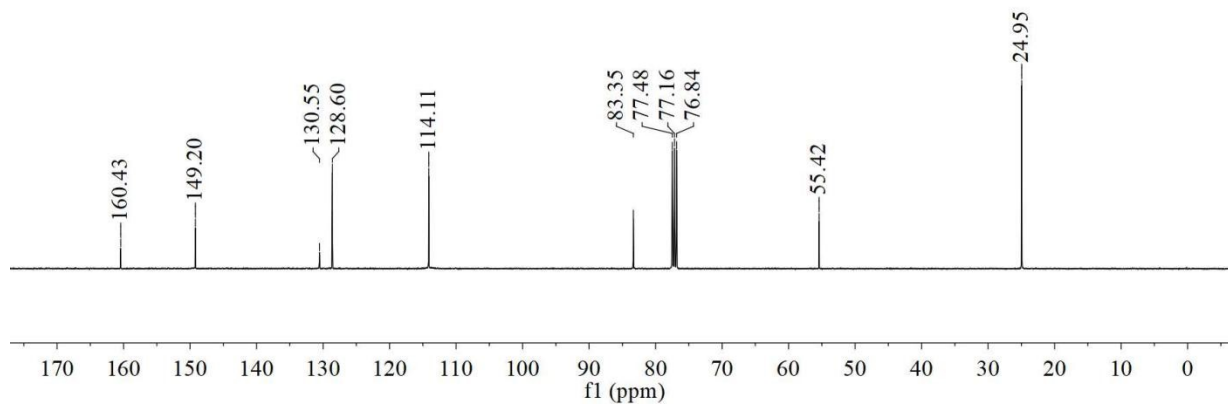

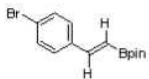

**3f**

400 MHz, CDCl<sub>3</sub>

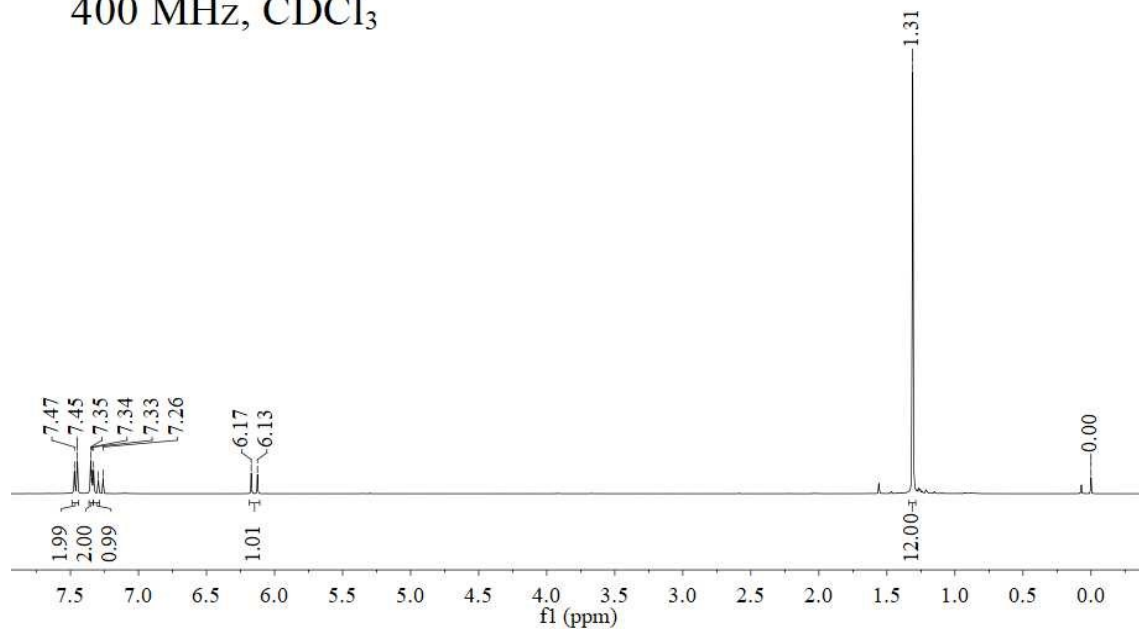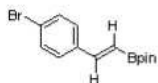

**3f**

101 MHz, CDCl<sub>3</sub>

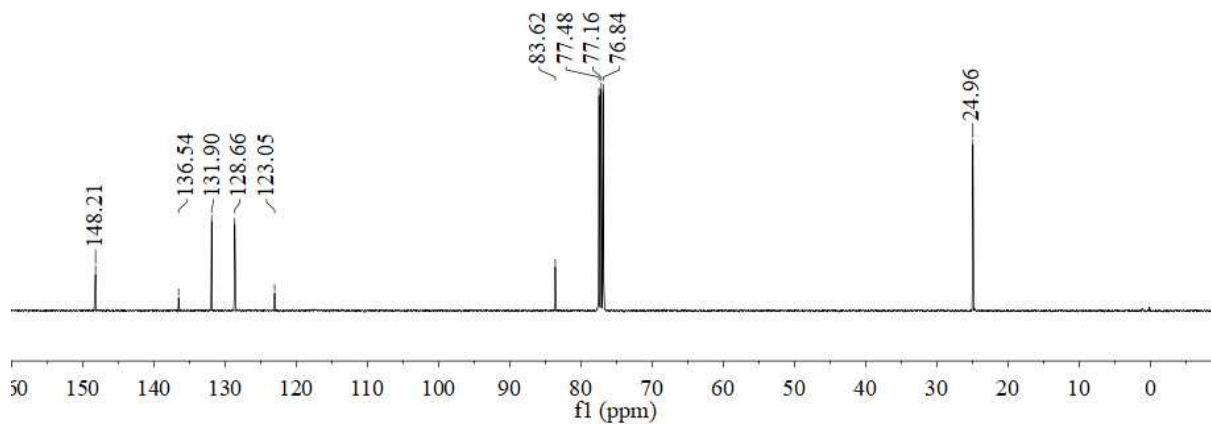

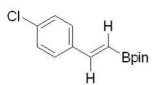

**3g**  
400 MHz, CDCl<sub>3</sub>

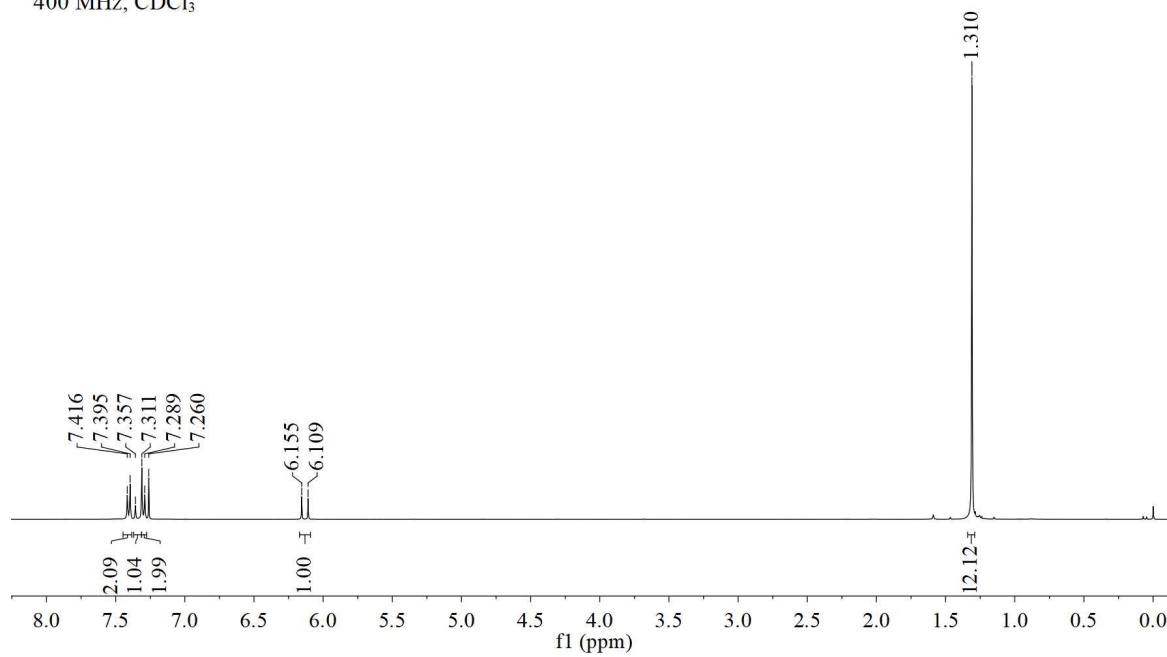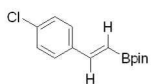

**3g**  
400 MHz, CDCl<sub>3</sub>

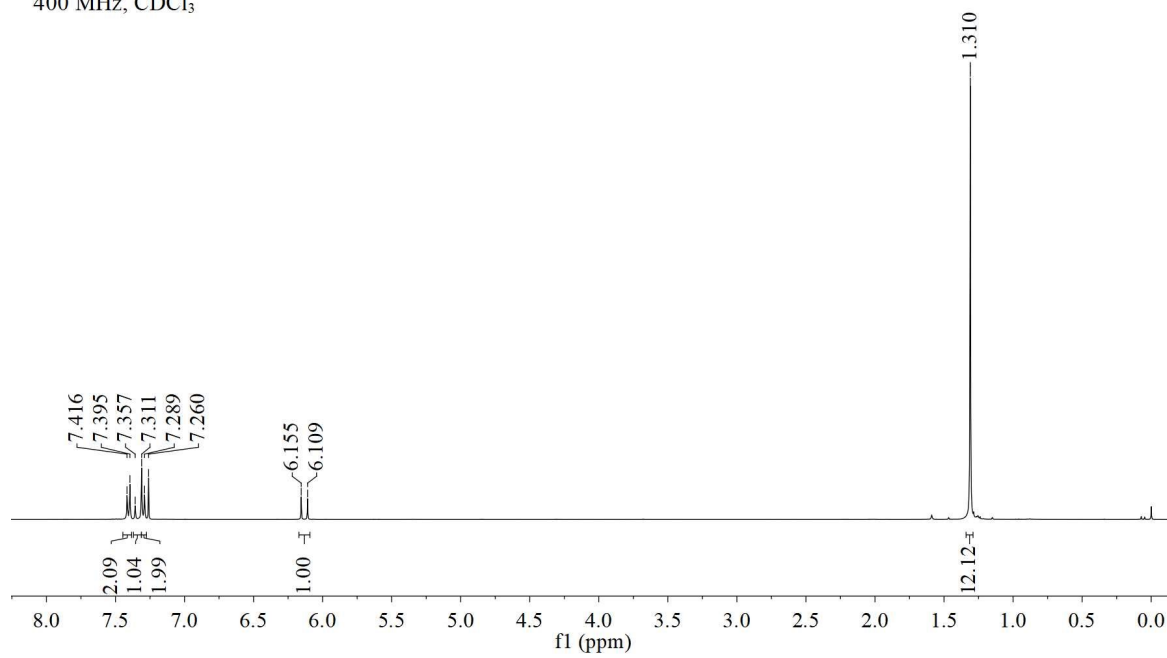

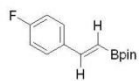

**3h**  
400 MHz, CDCl<sub>3</sub>

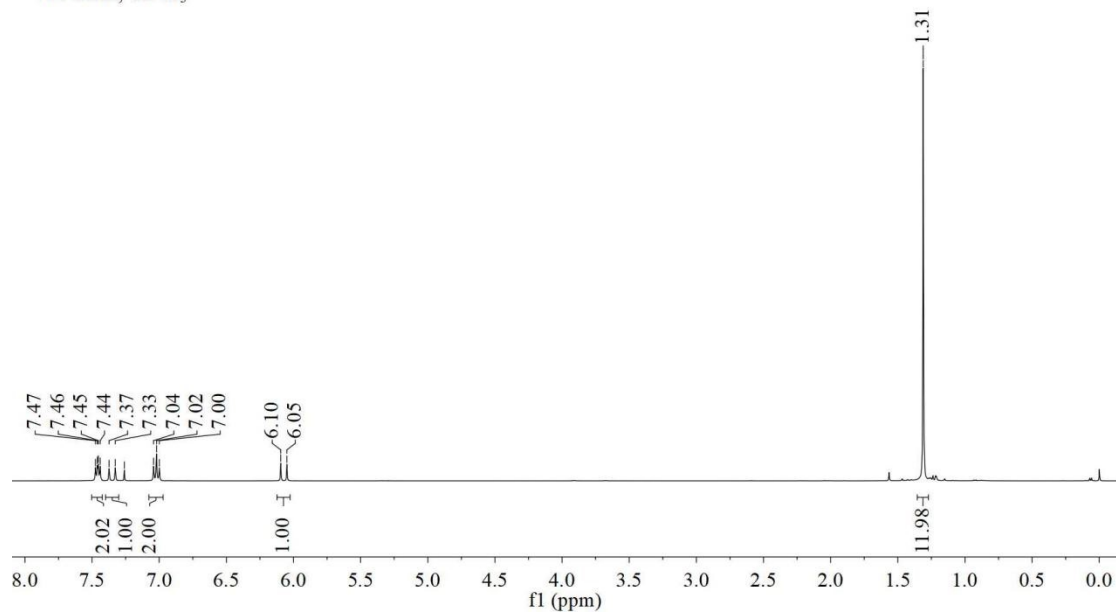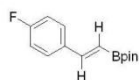

**3h**  
101 MHz, CDCl<sub>3</sub>

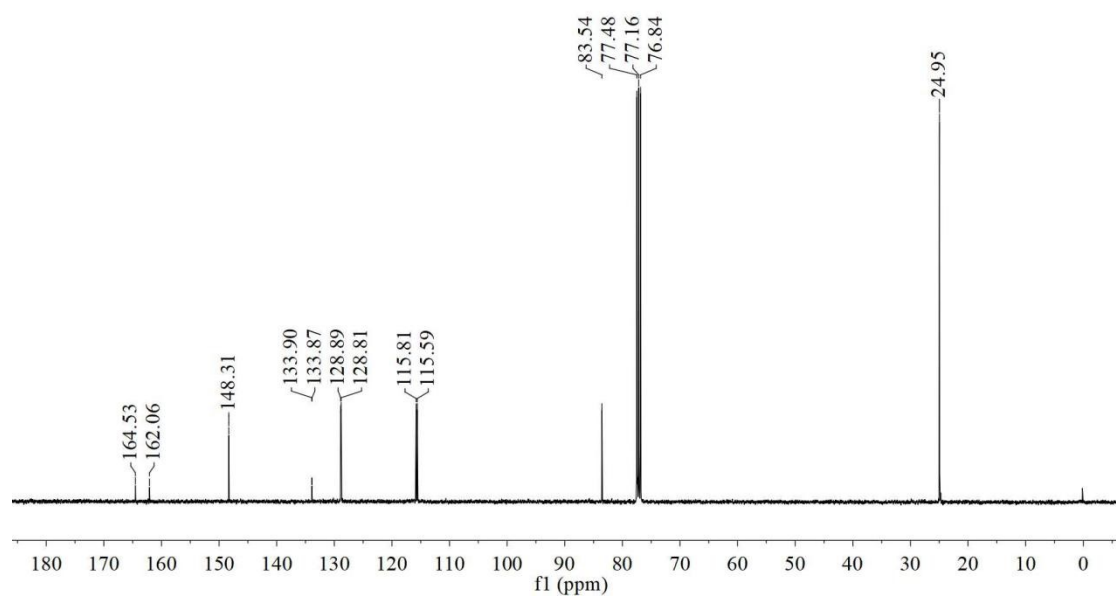



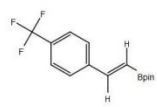

**3i**

400 MHz, CDCl<sub>3</sub>

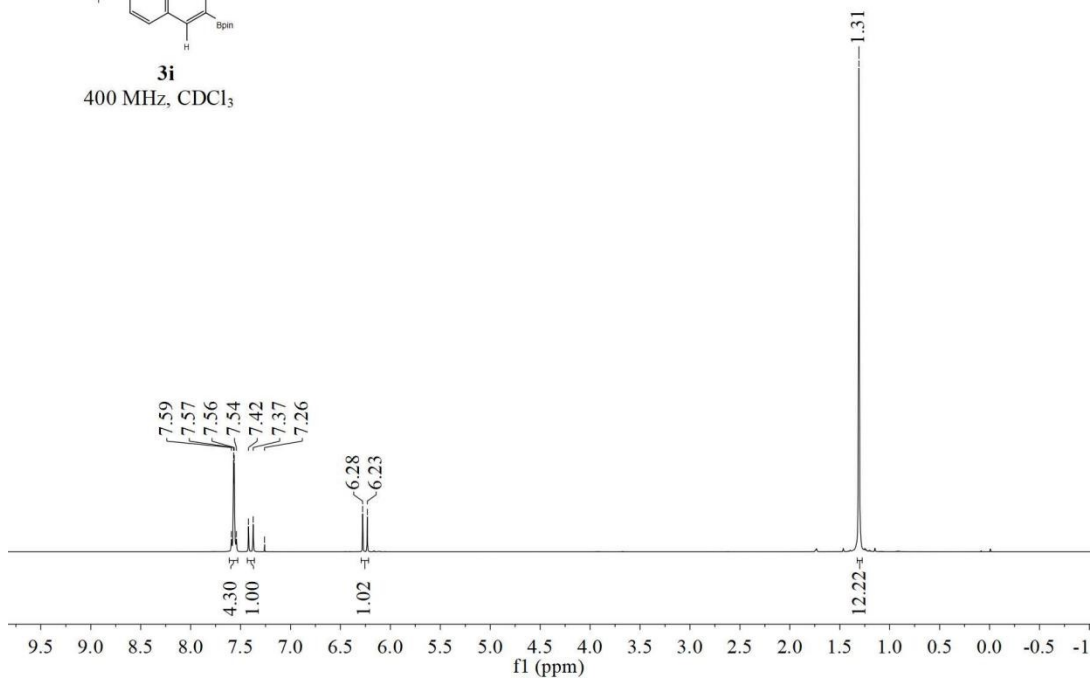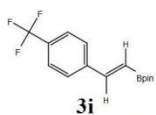

**3i**

101 MHz, CDCl<sub>3</sub>

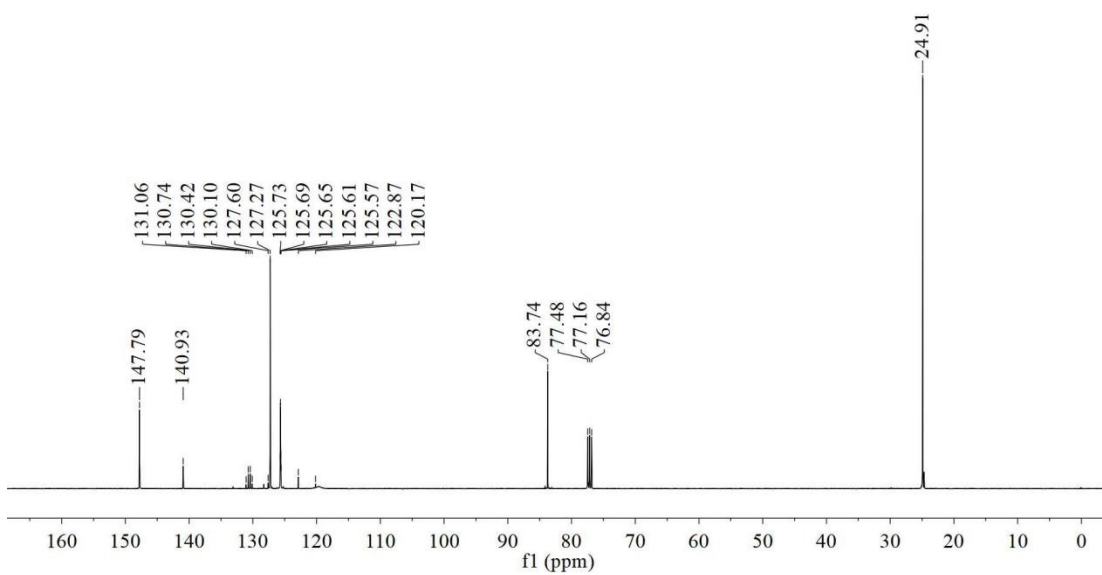

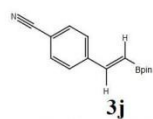

101 MHz, CDCl<sub>3</sub>

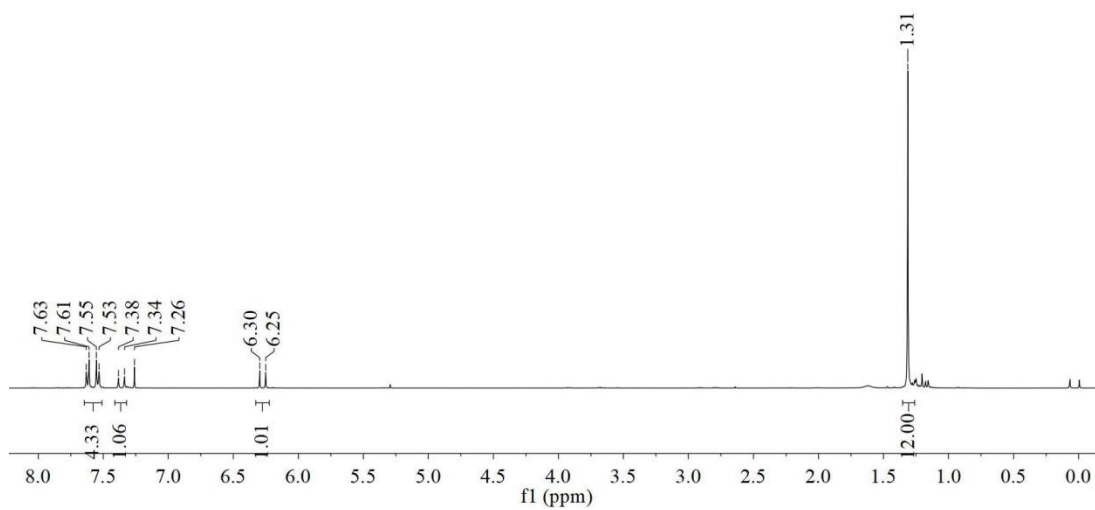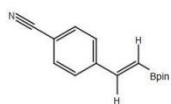

101 MHz, CDCl<sub>3</sub>

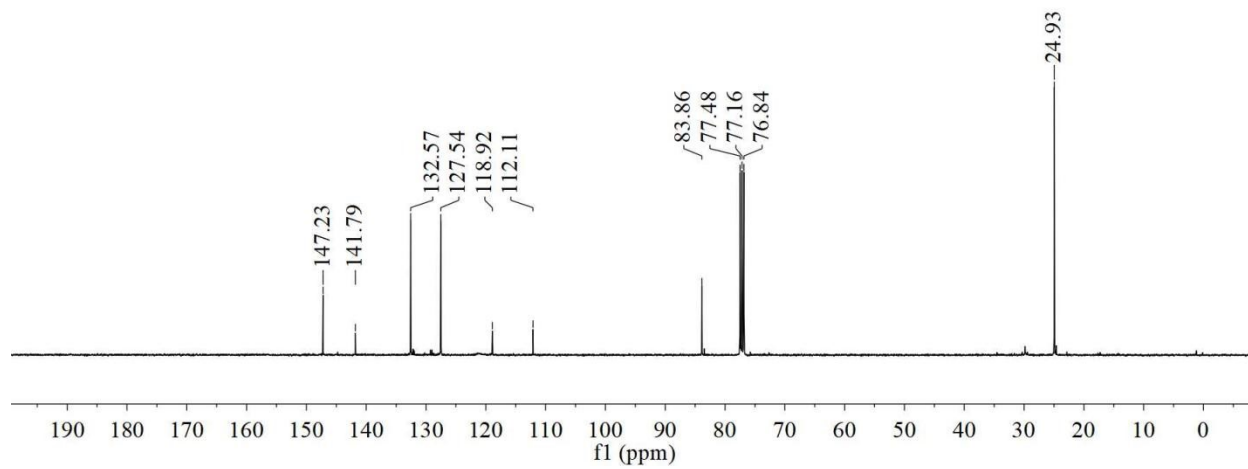

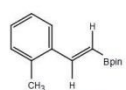

**3k**

400 MHz, CDCl<sub>3</sub>

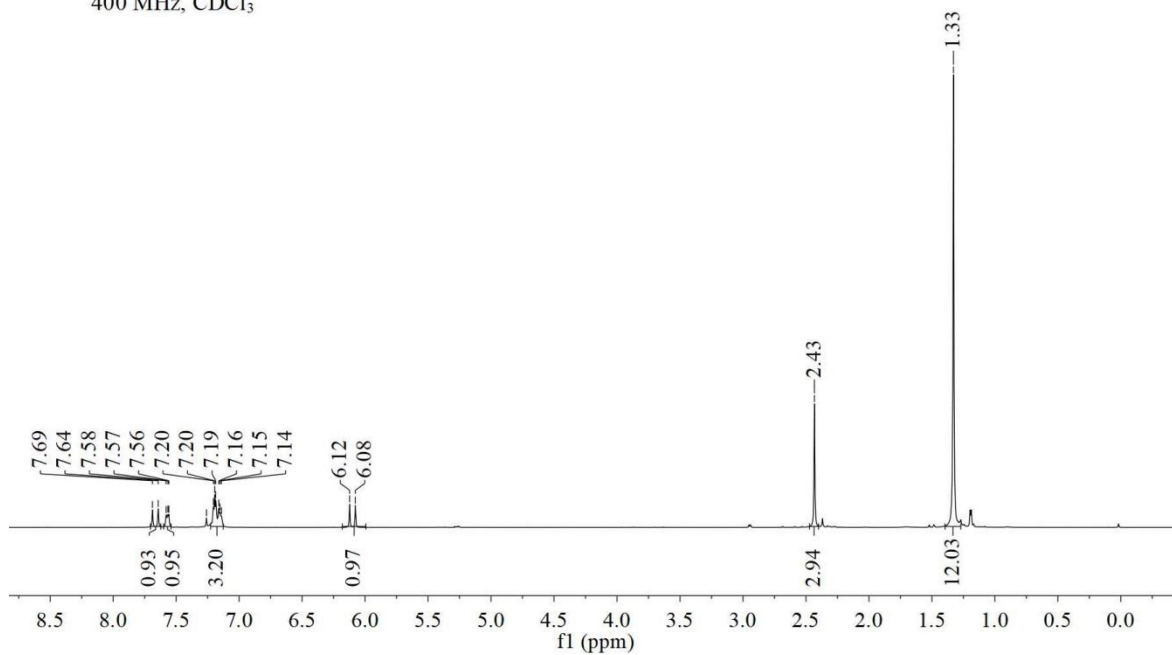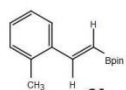

**3k**

101 MHz, CDCl<sub>3</sub>

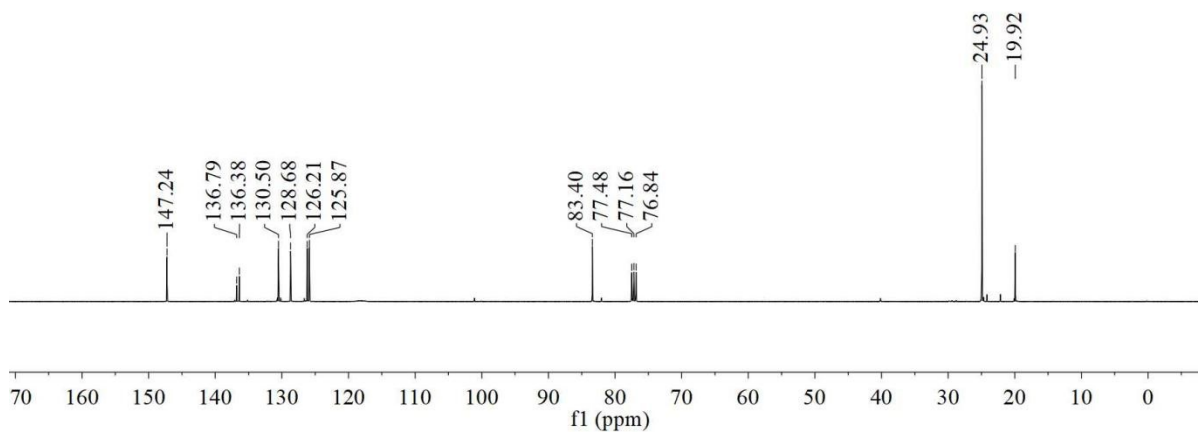

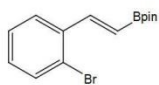

**31**  
400 MHz, CDCl<sub>3</sub>

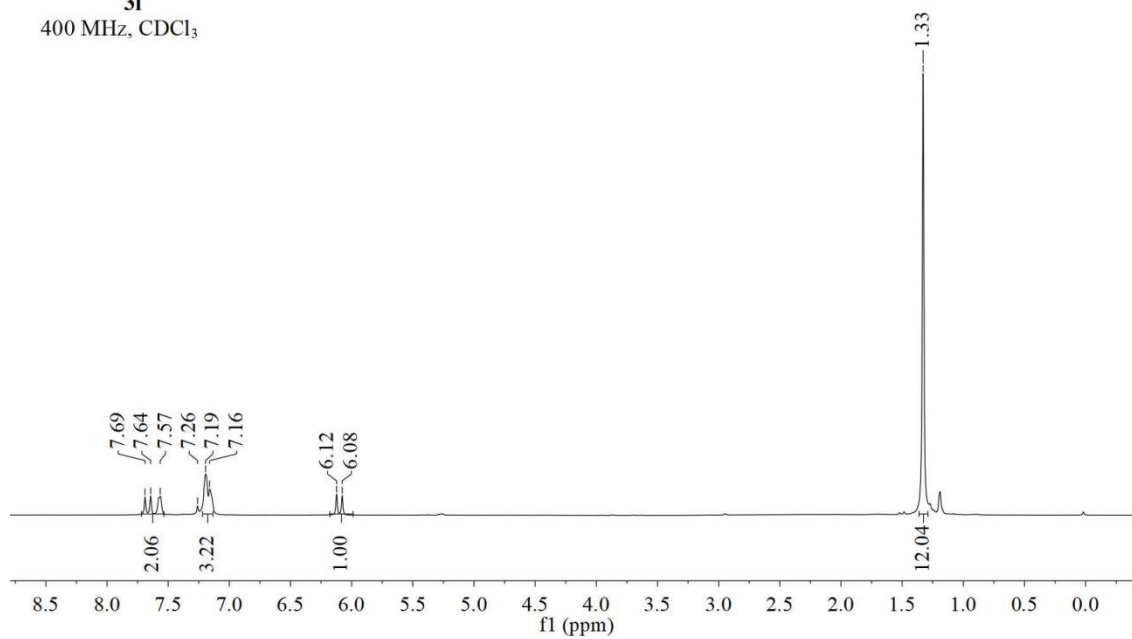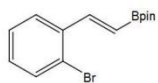

**31**  
101 MHz, CDCl<sub>3</sub>

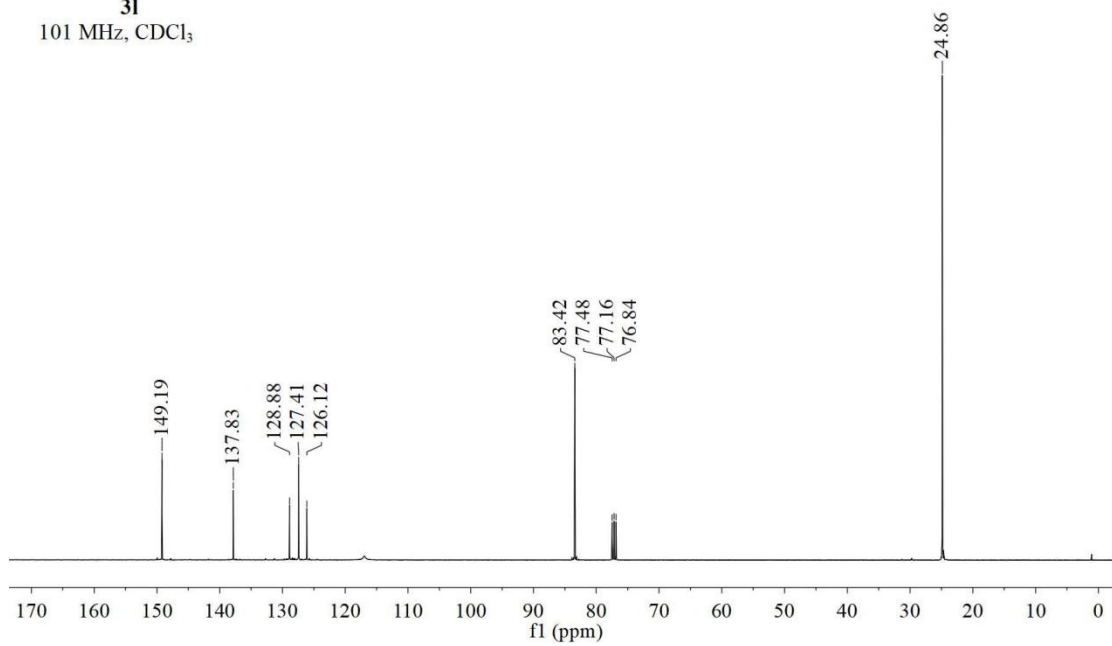

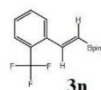

400 MHz, CDCl<sub>3</sub>

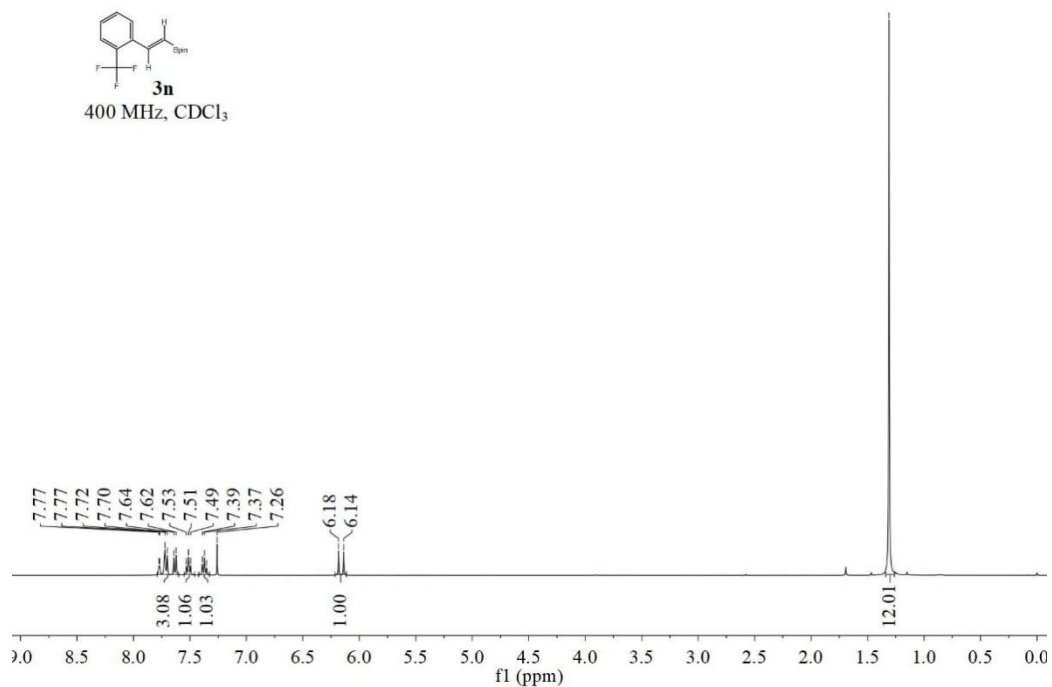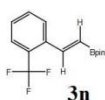

101 MHz, CDCl<sub>3</sub>

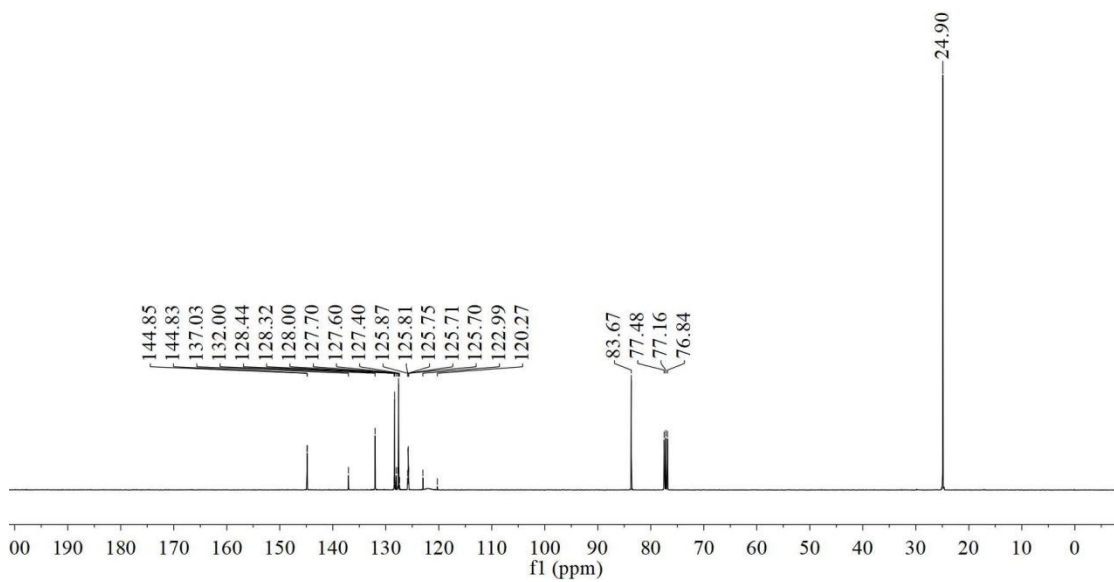

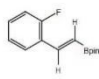

**3m**  
400 MHz, CDCl<sub>3</sub>

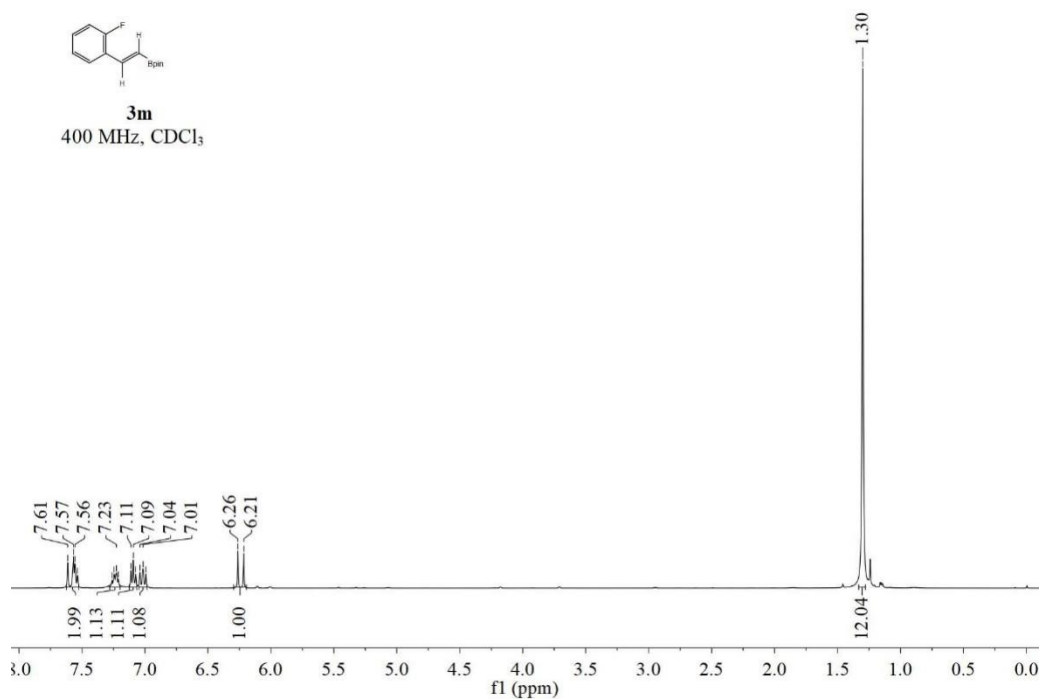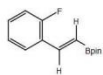

**3m**  
101 MHz, CDCl<sub>3</sub>

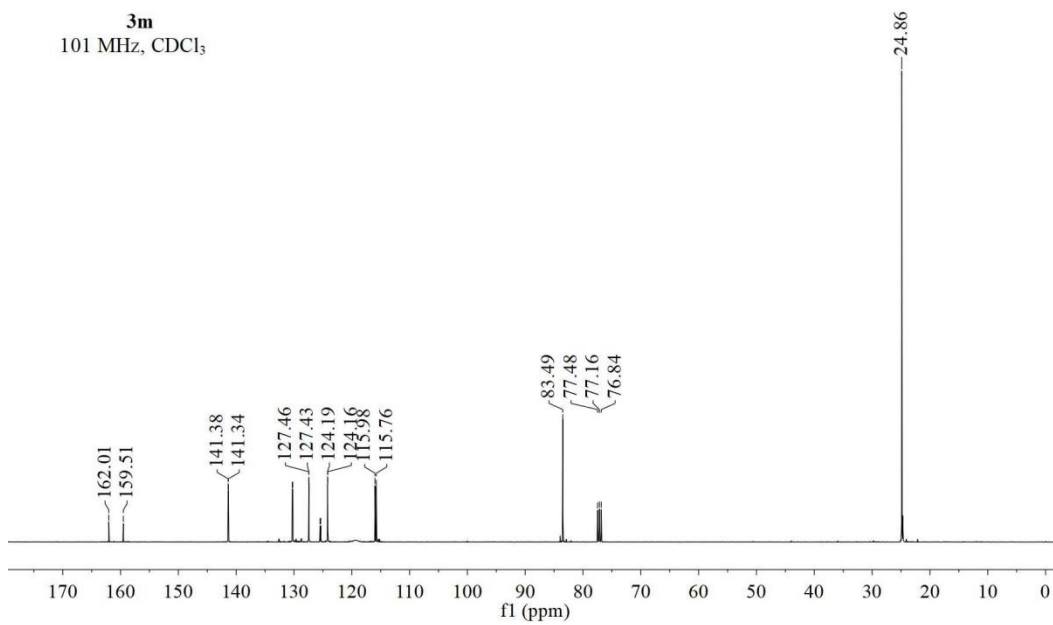

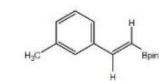

**3o**  
400 MHz, CDCl<sub>3</sub>

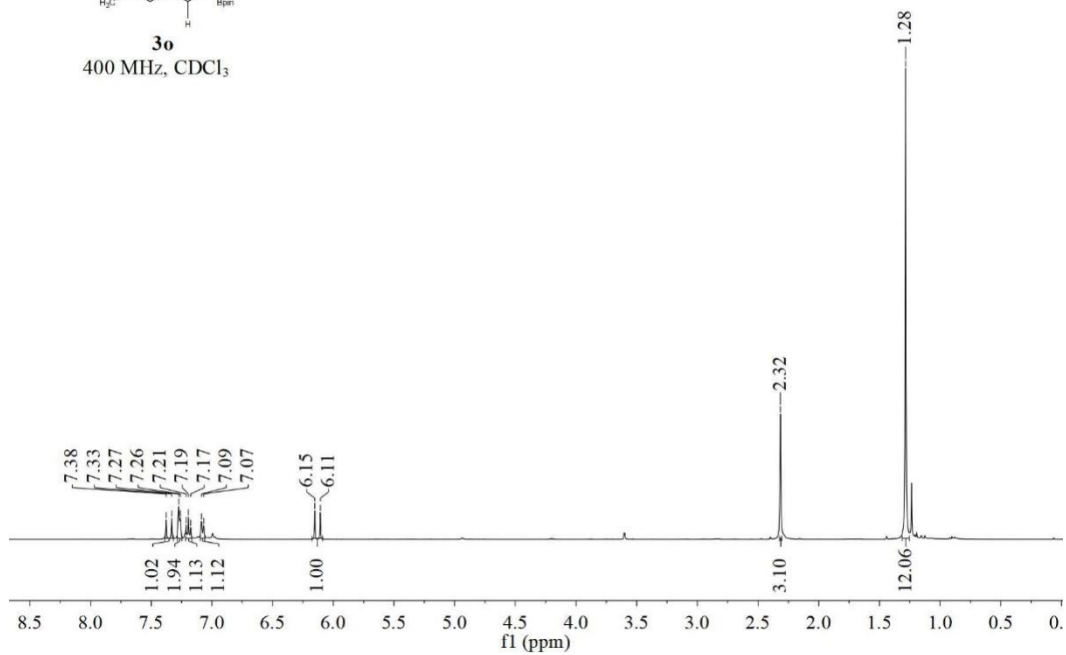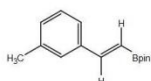

**3o**  
101 MHz, CDCl<sub>3</sub>

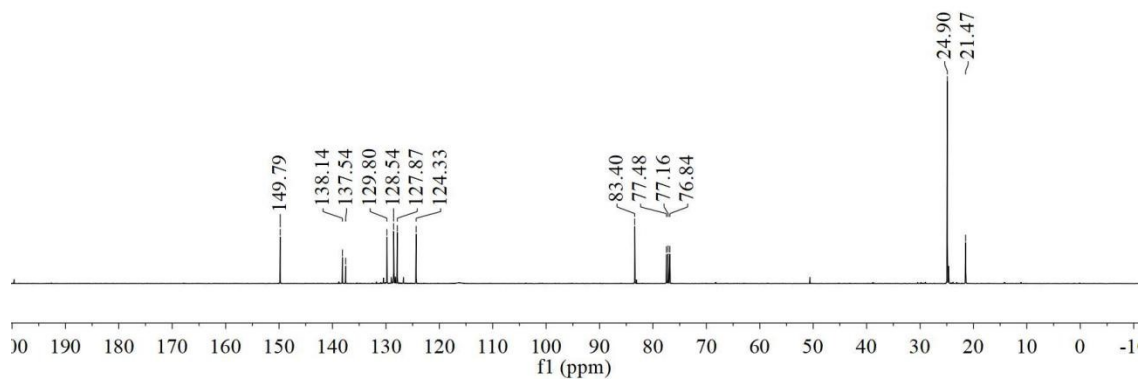

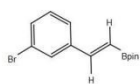

**3p**

400 MHz, CDCl<sub>3</sub>

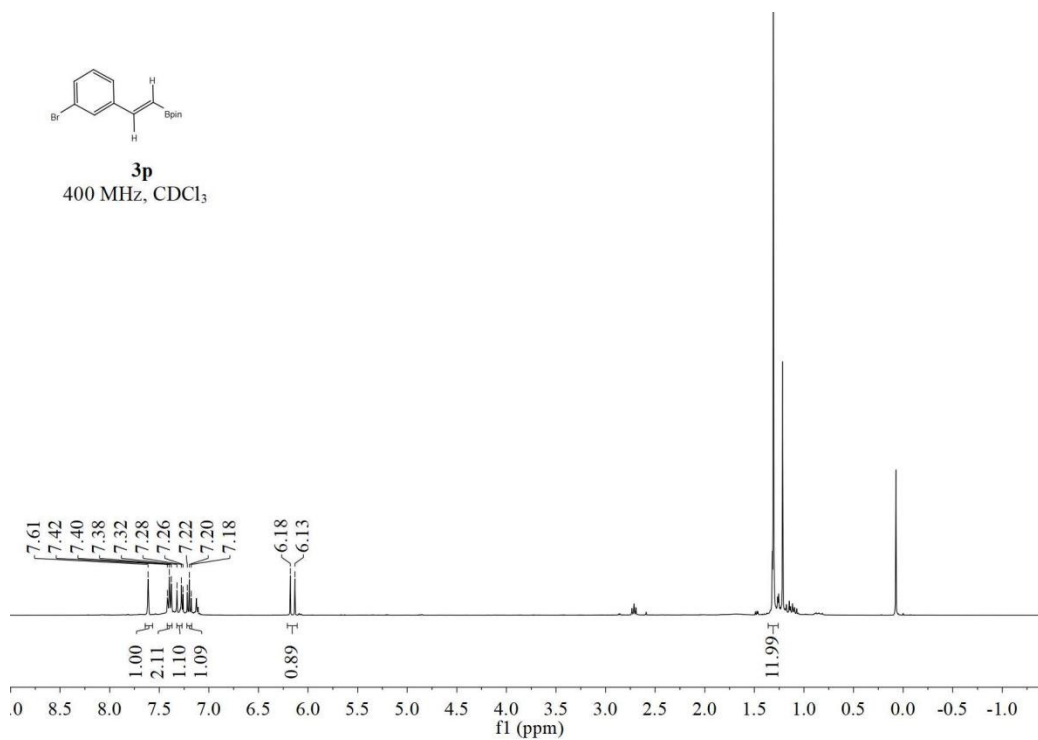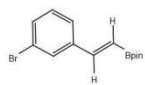

**3p**

101 MHz, CDCl<sub>3</sub>

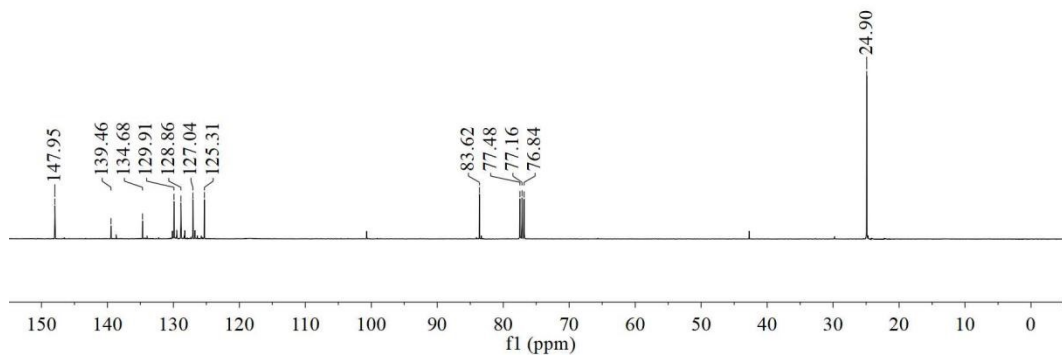



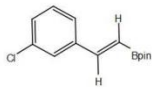

**3q**  
400 MHz, CDCl<sub>3</sub>

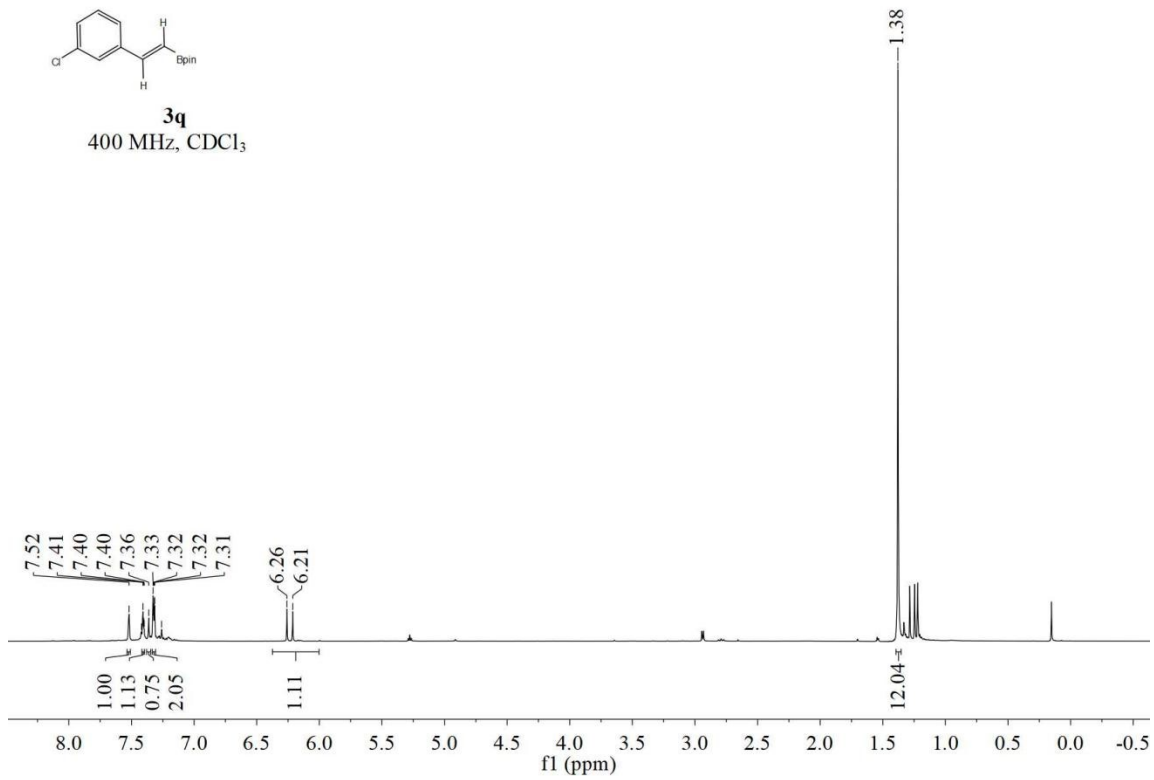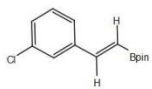

**3q**  
101 MHz, CDCl<sub>3</sub>

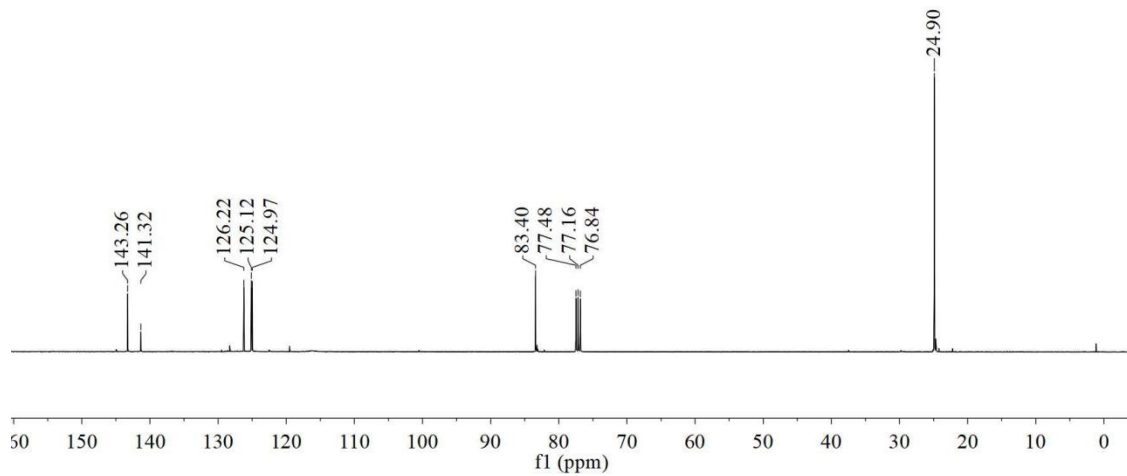

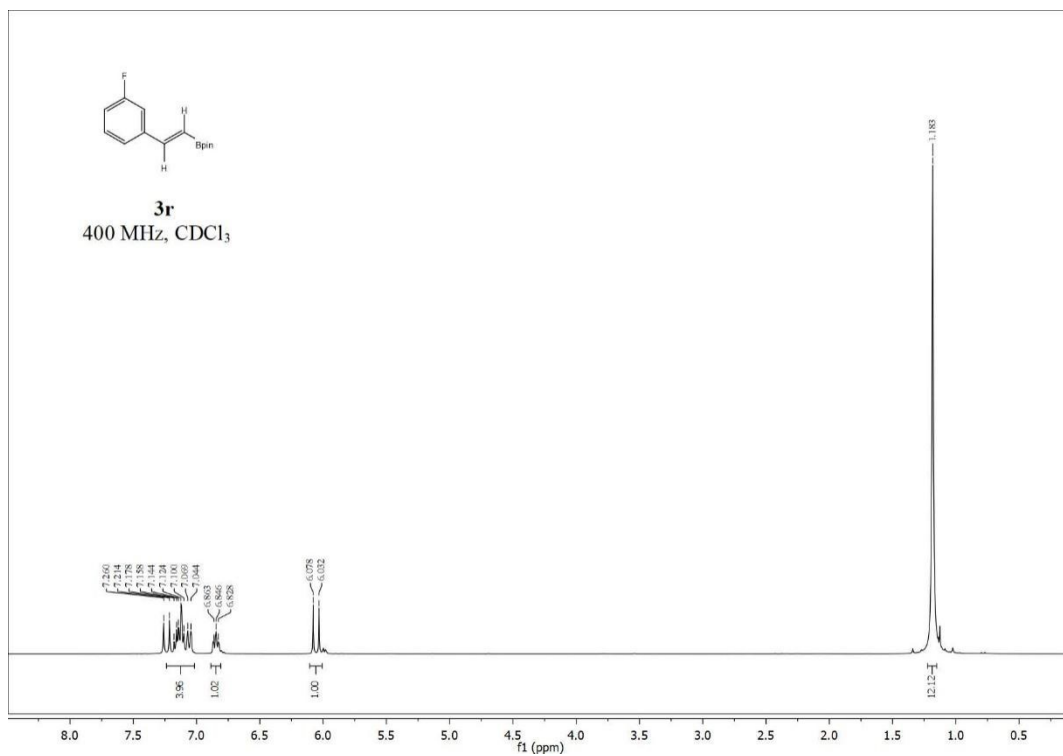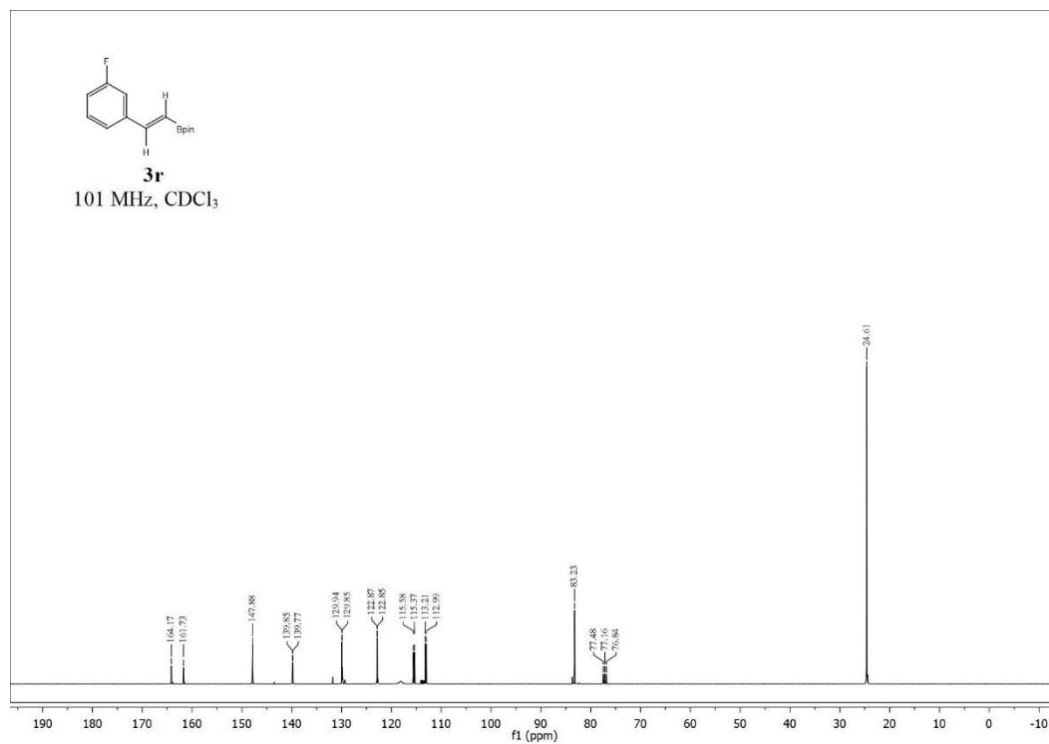

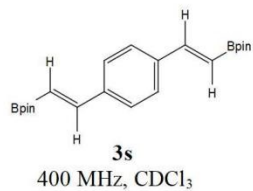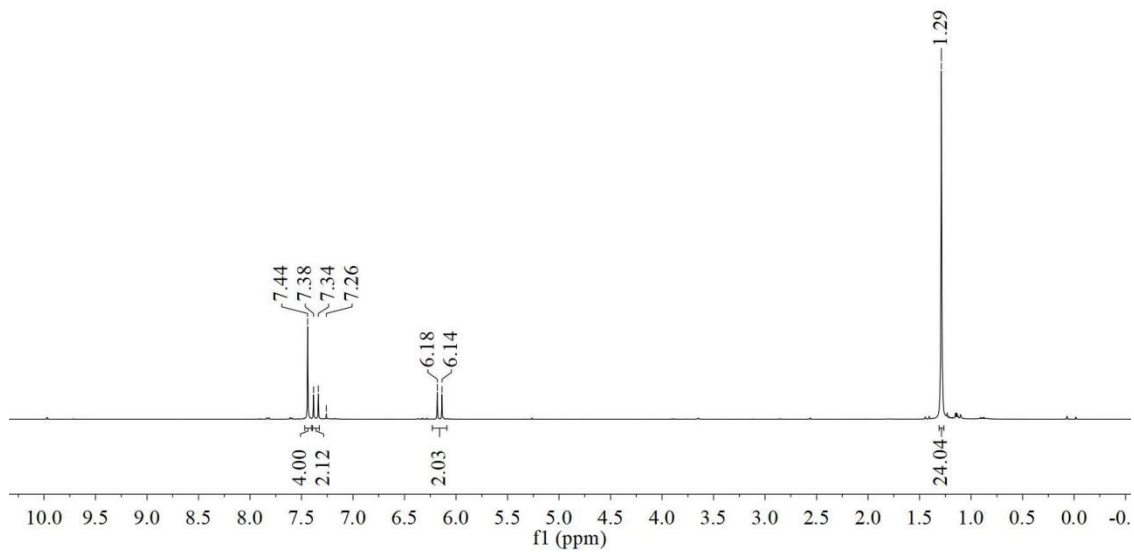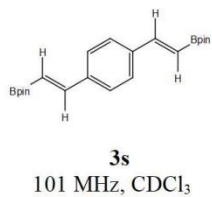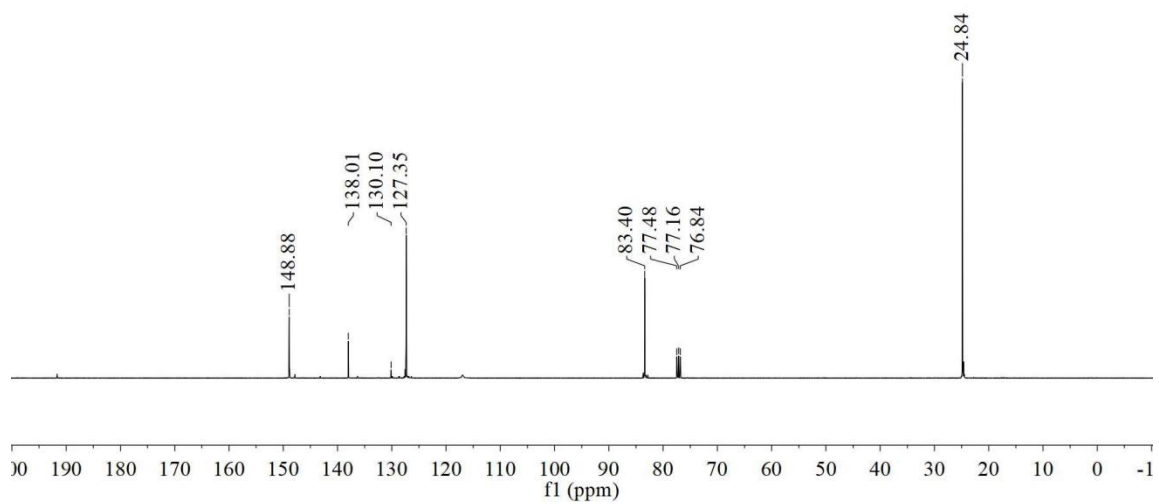

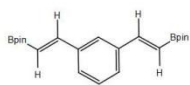

**3t**

101 MHz, CDCl<sub>3</sub>

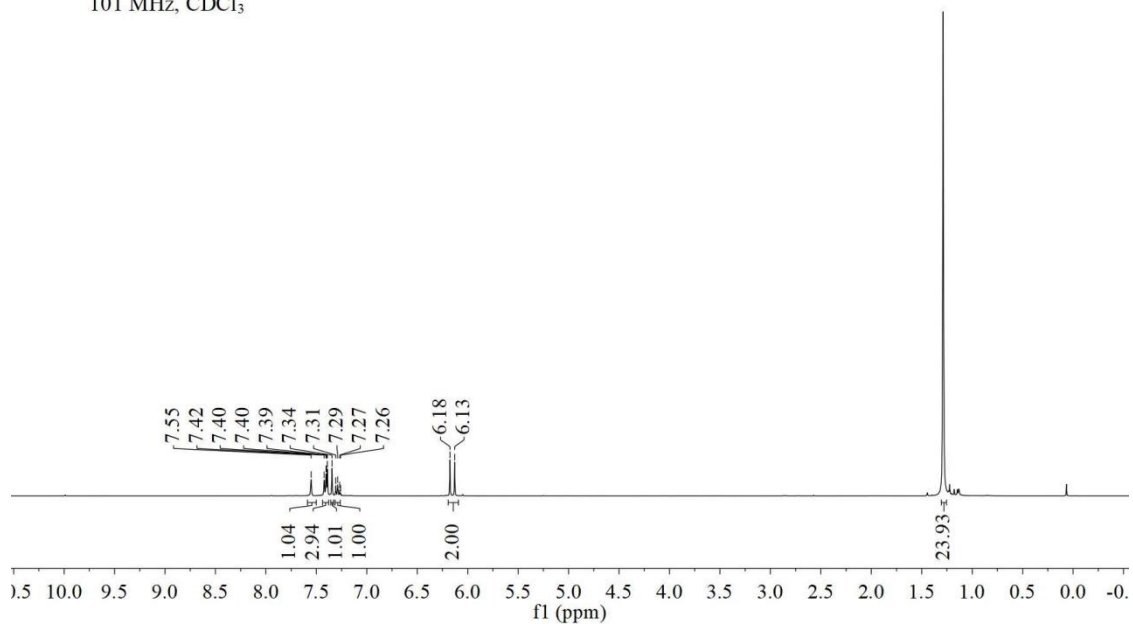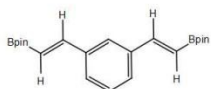

**3t**

400 MHz, CDCl<sub>3</sub>

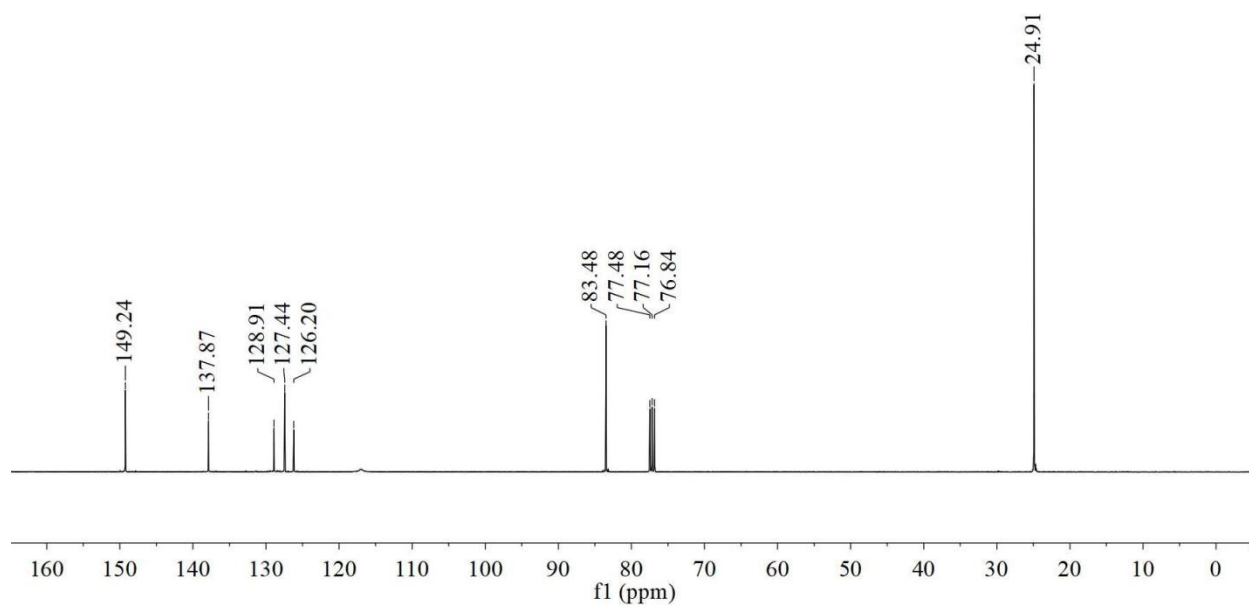

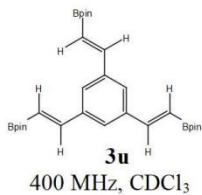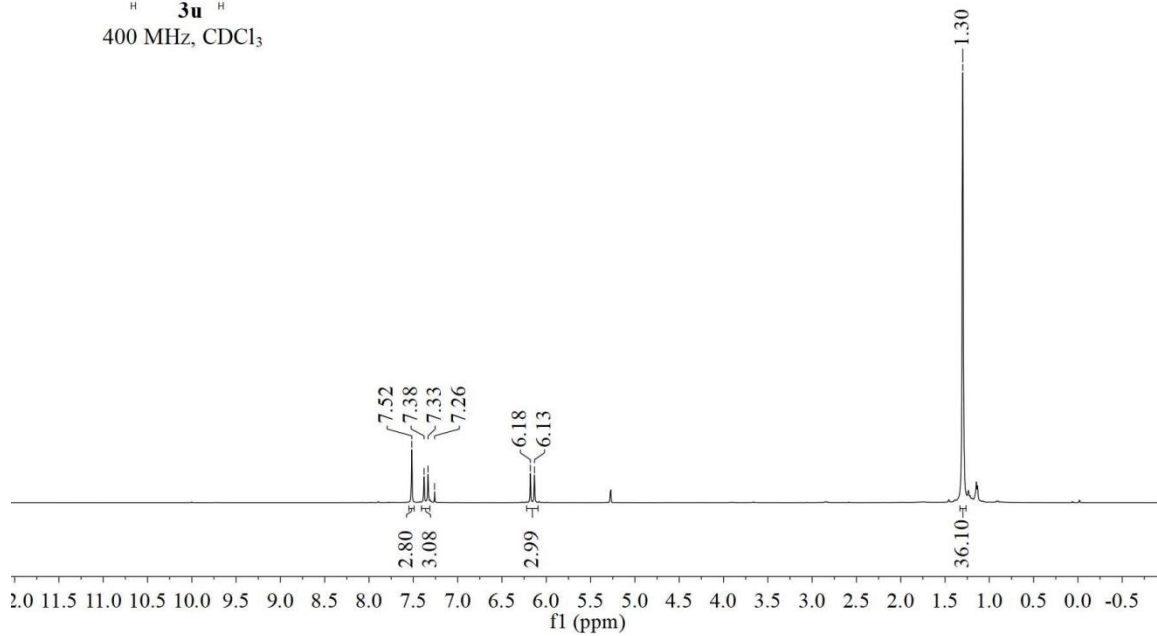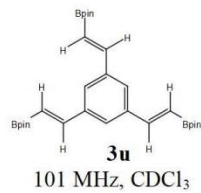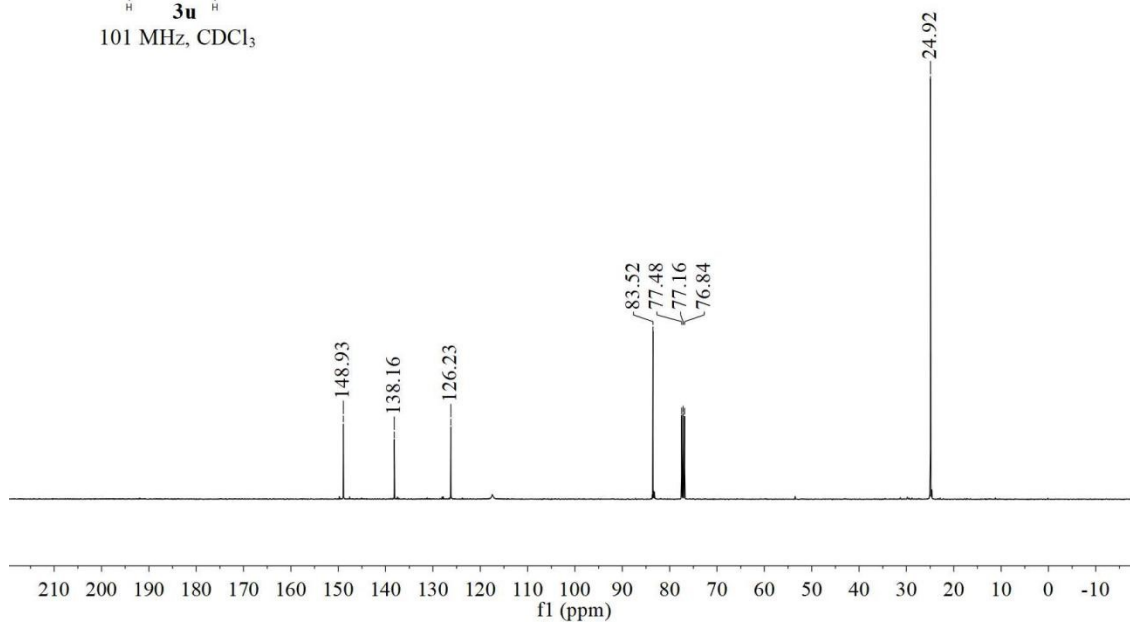

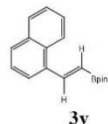

101 MHz, CDCl<sub>3</sub>

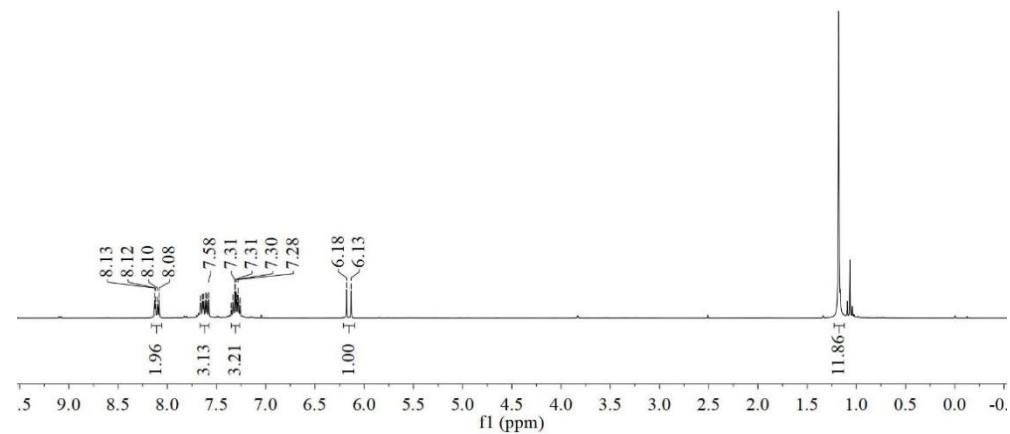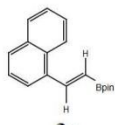

101 MHz, CDCl<sub>3</sub>

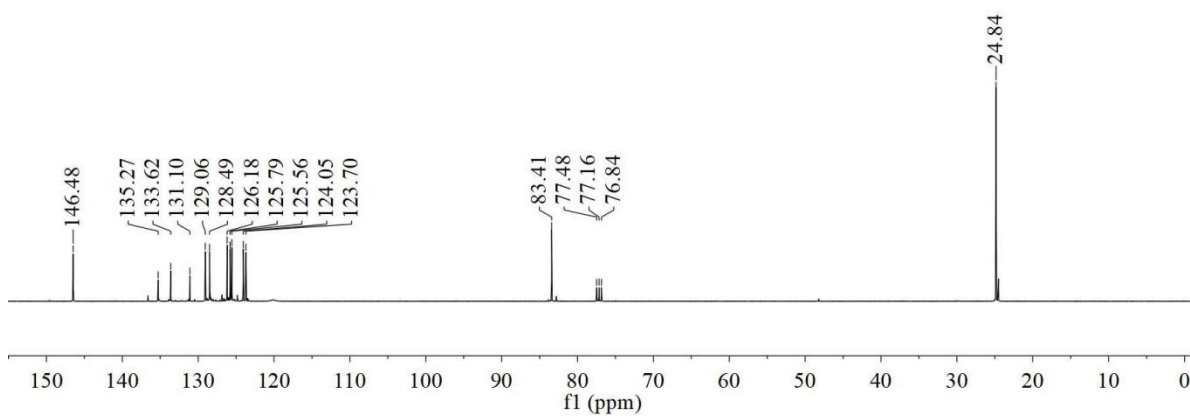

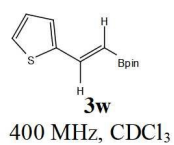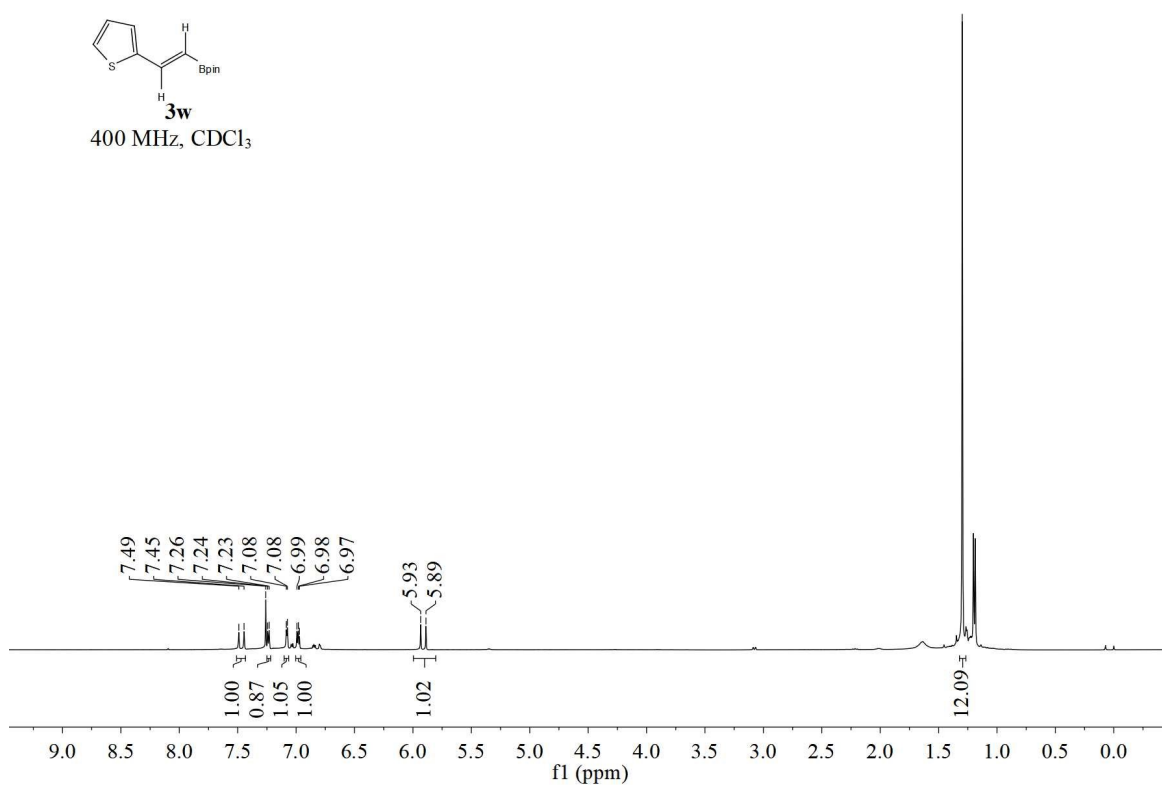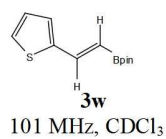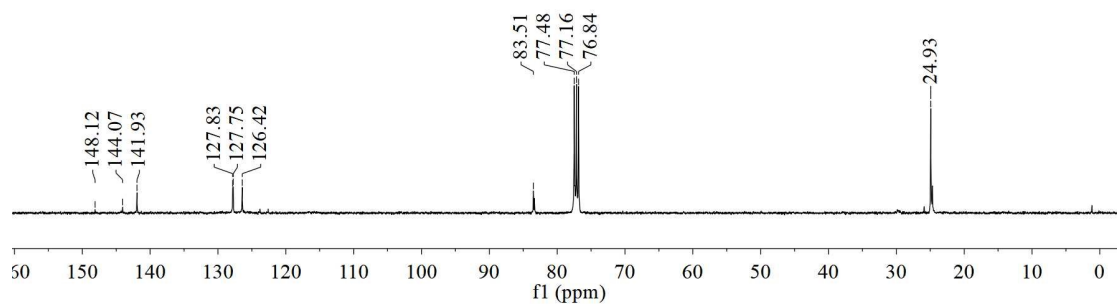

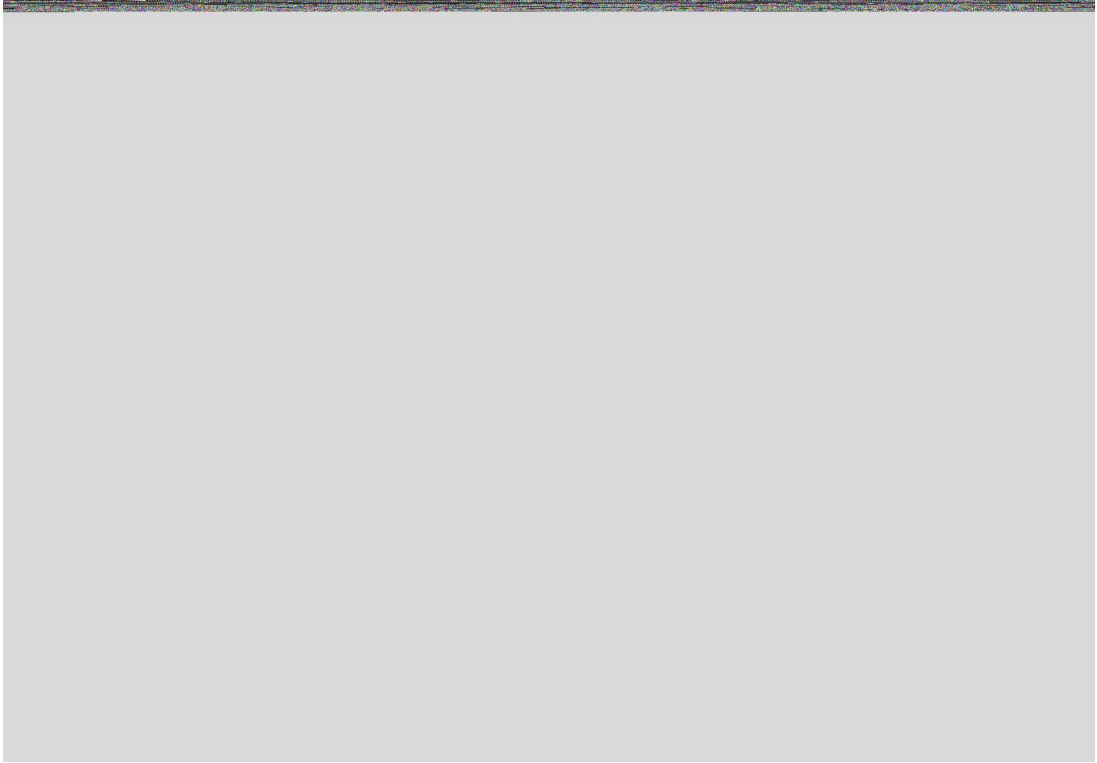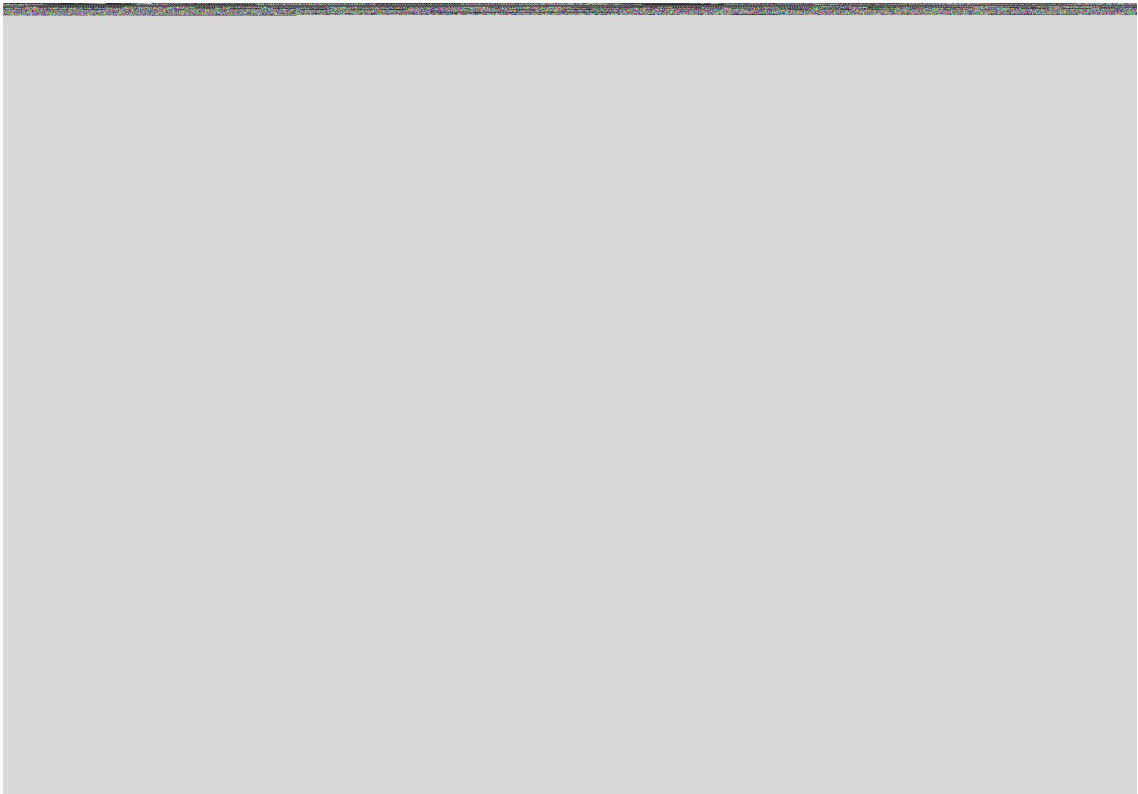



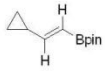

**3y**  
400 MHz, CDCl<sub>3</sub>

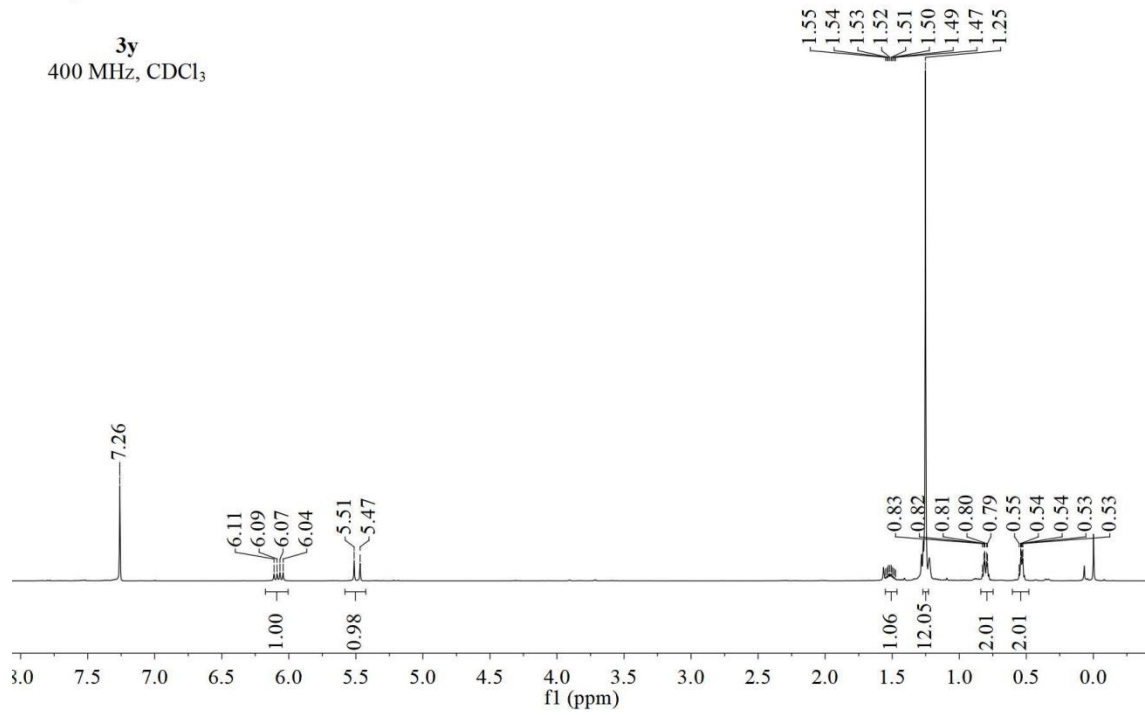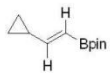

**3y**  
101 MHz, CDCl<sub>3</sub>

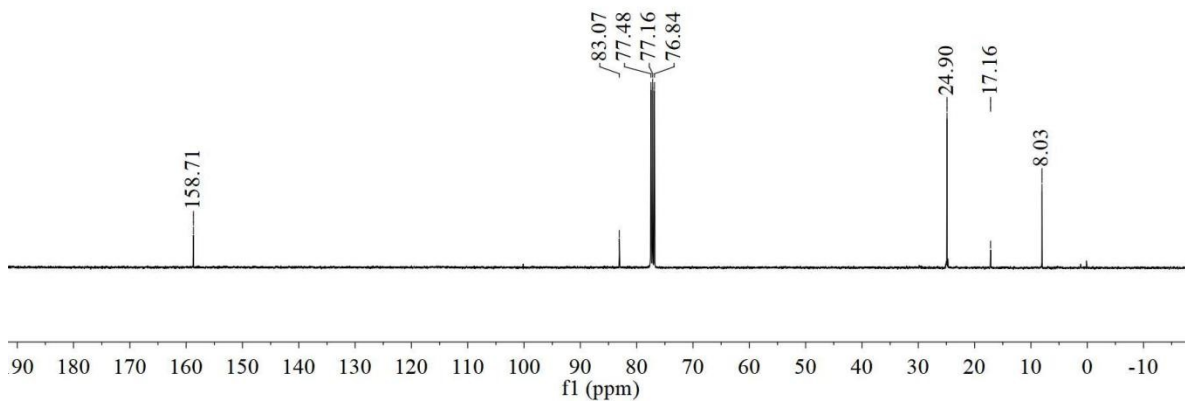

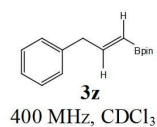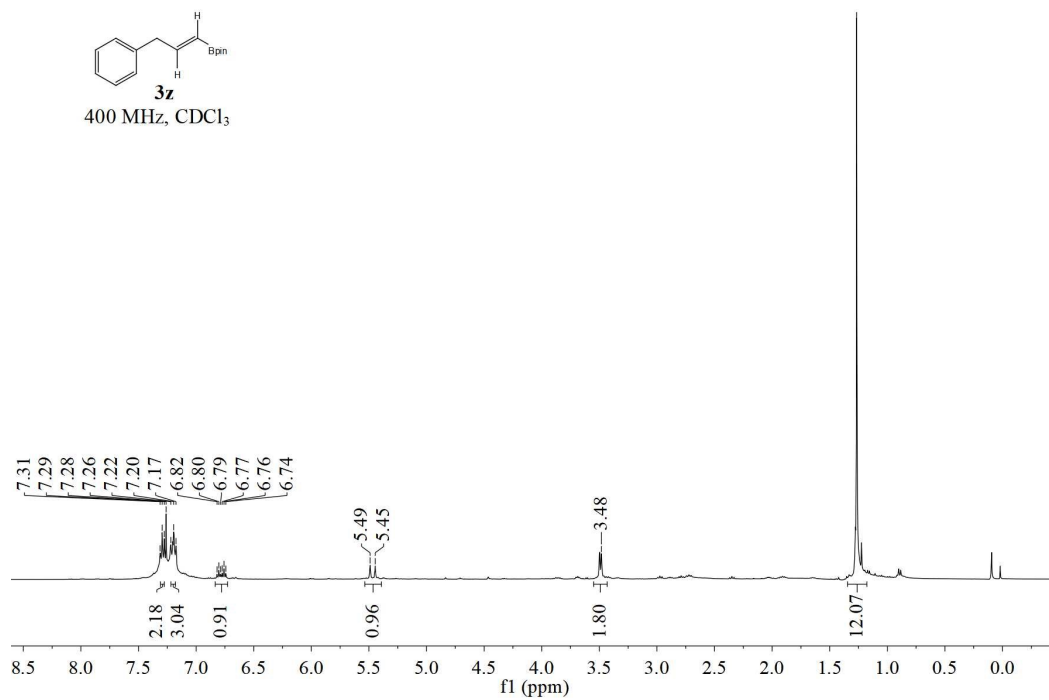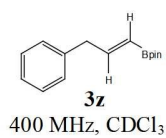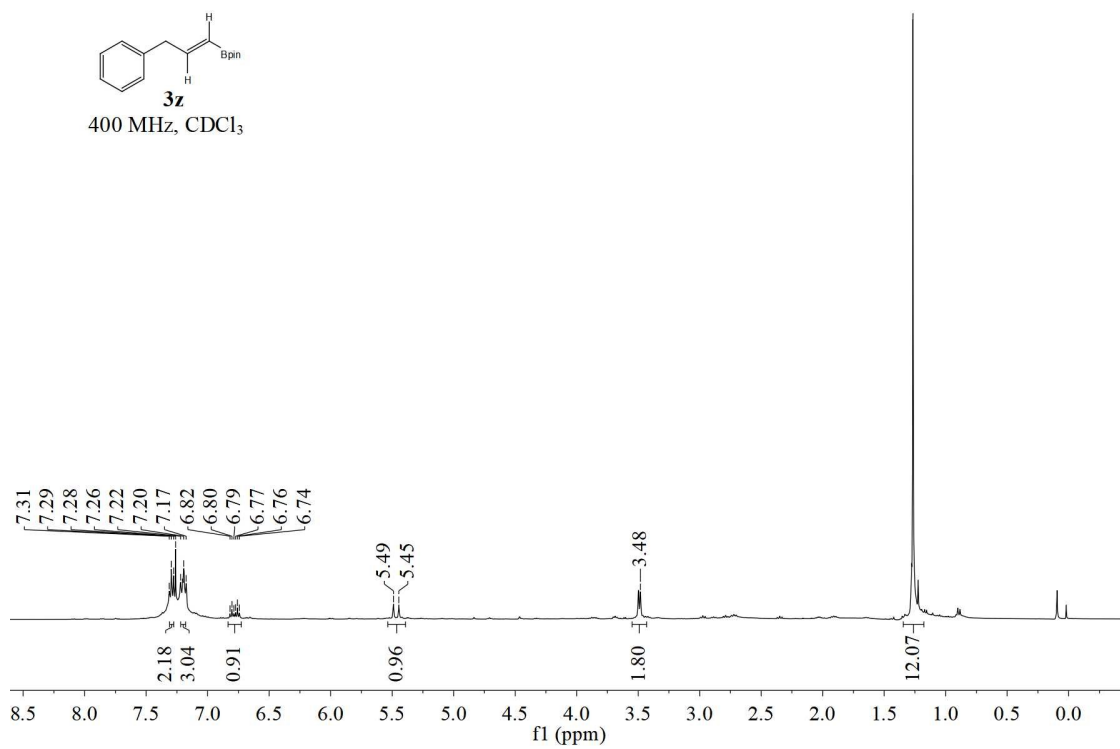

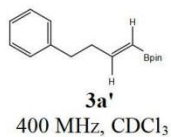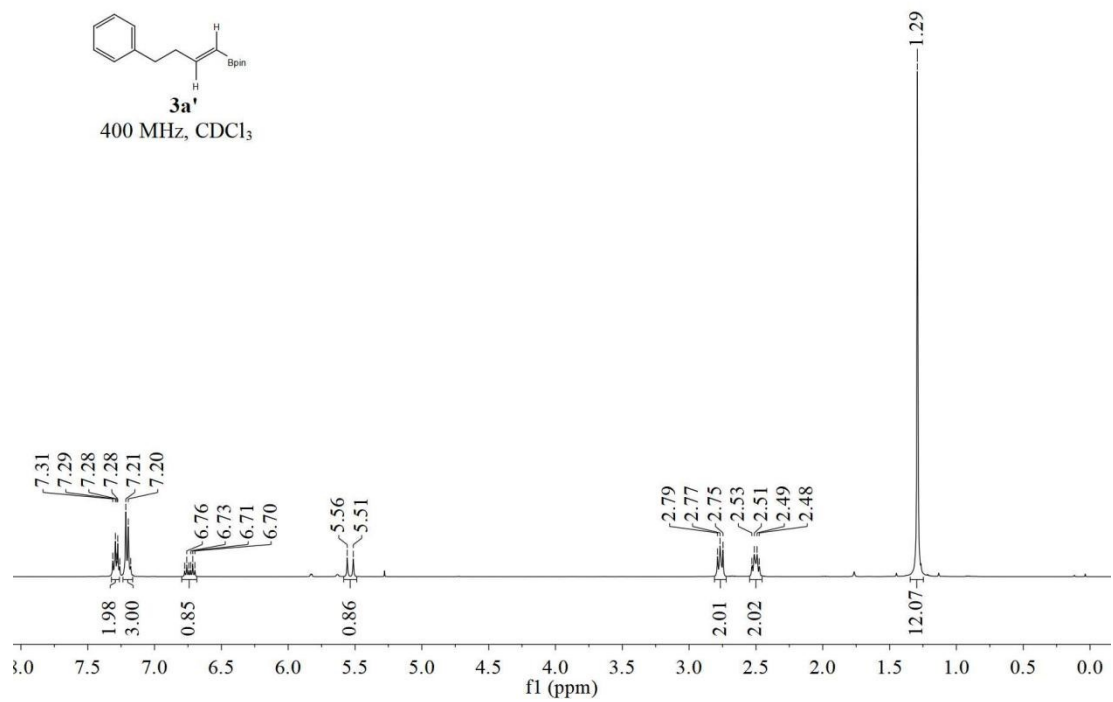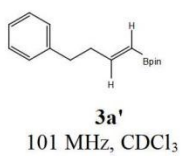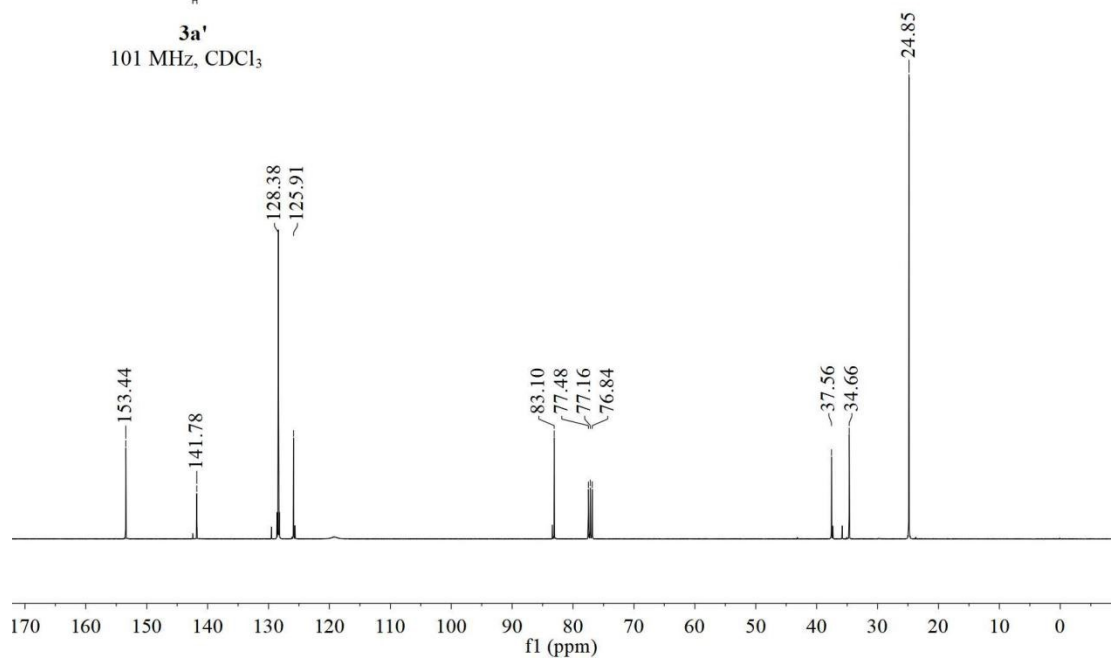

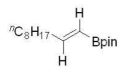

**3b'**  
400 MHz, CDCl<sub>3</sub>

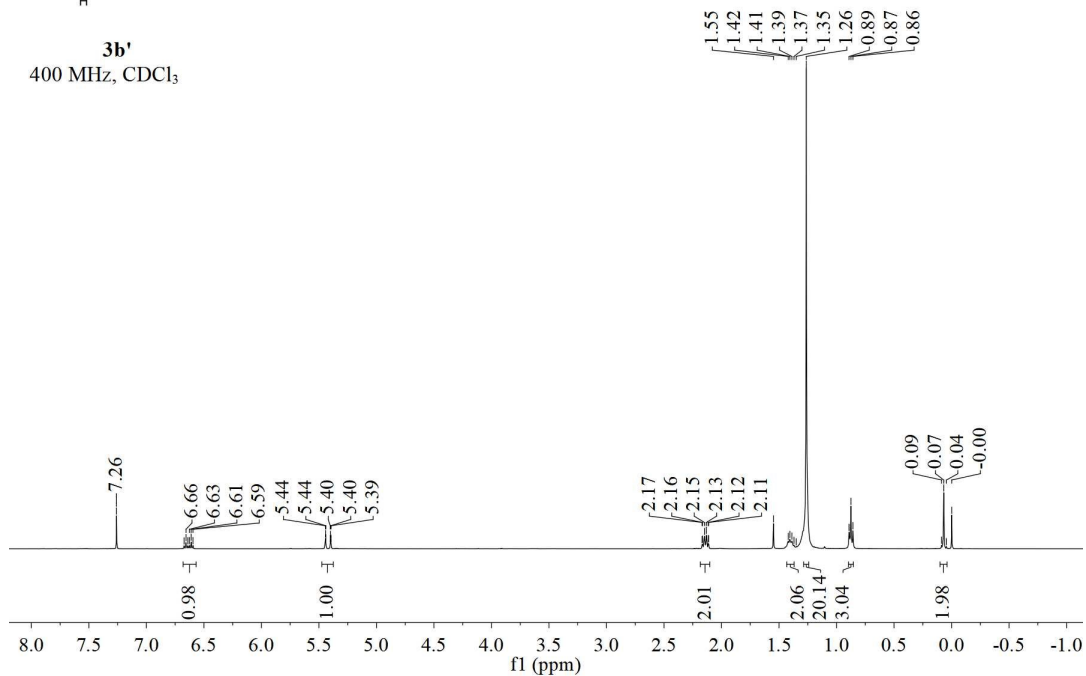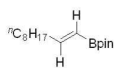

**3b'**  
400 MHz, CDCl<sub>3</sub>

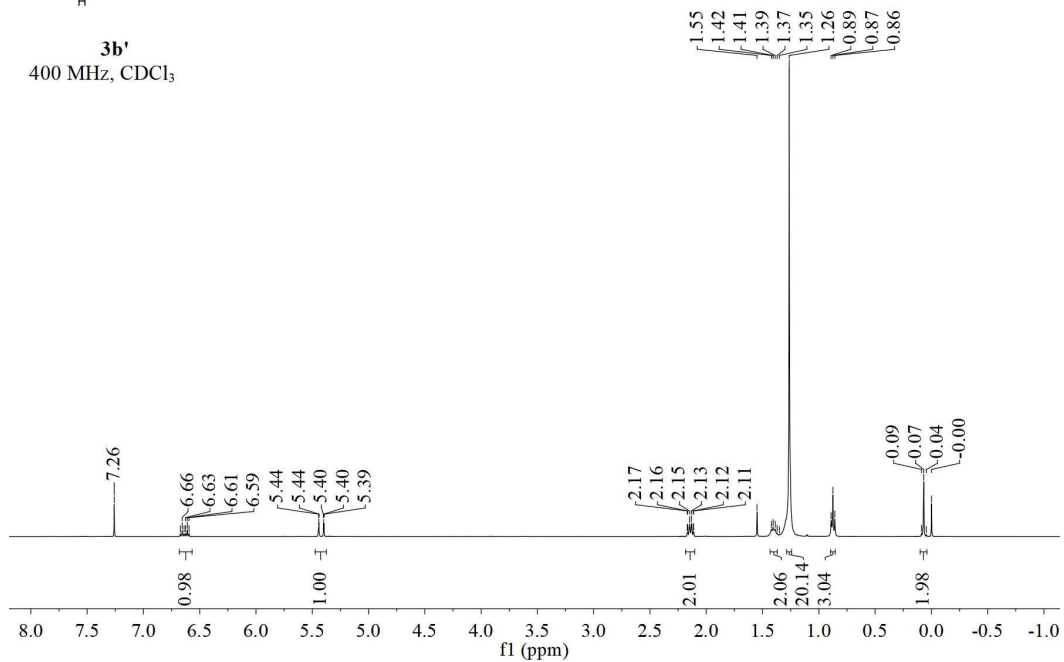

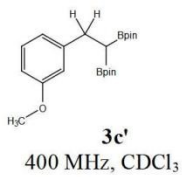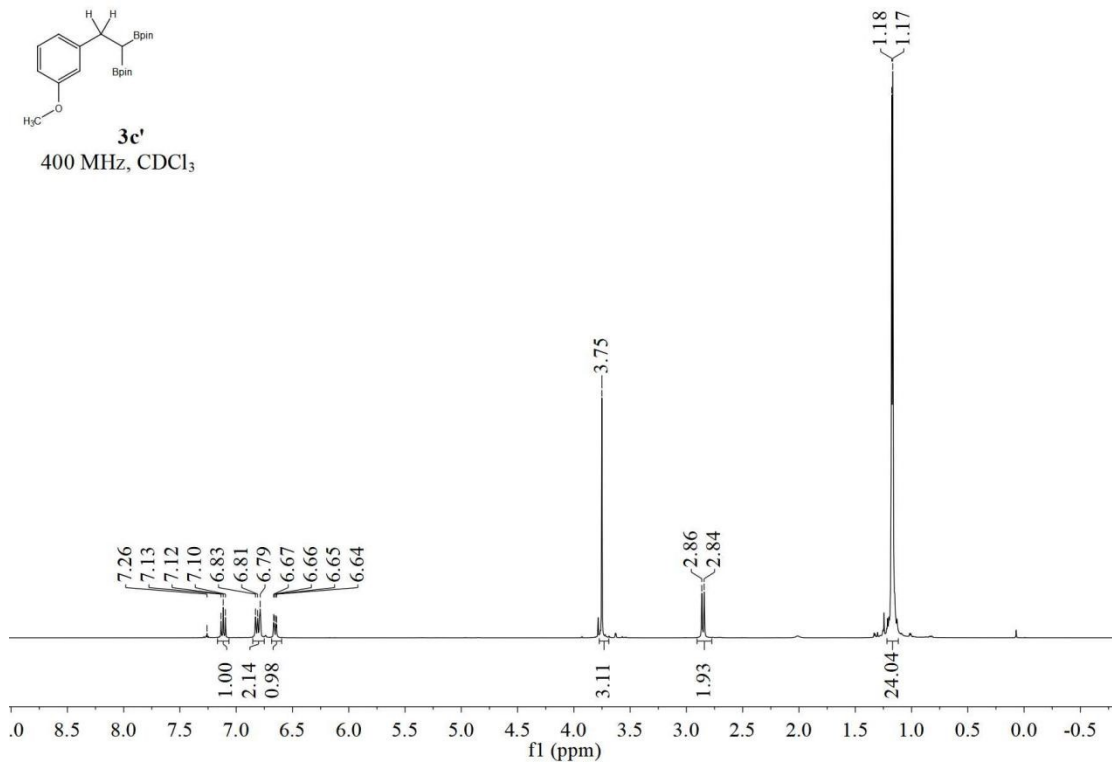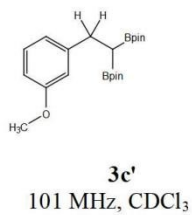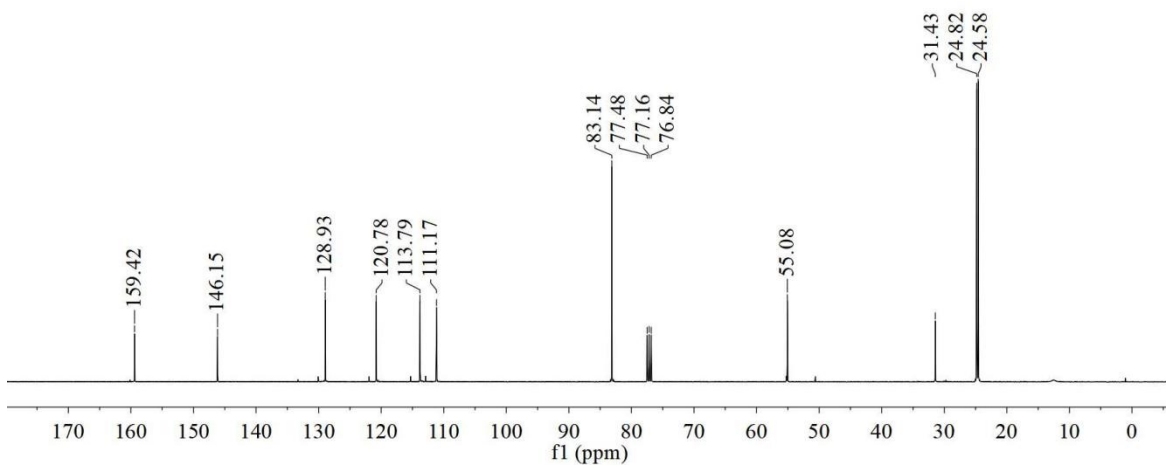

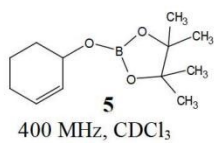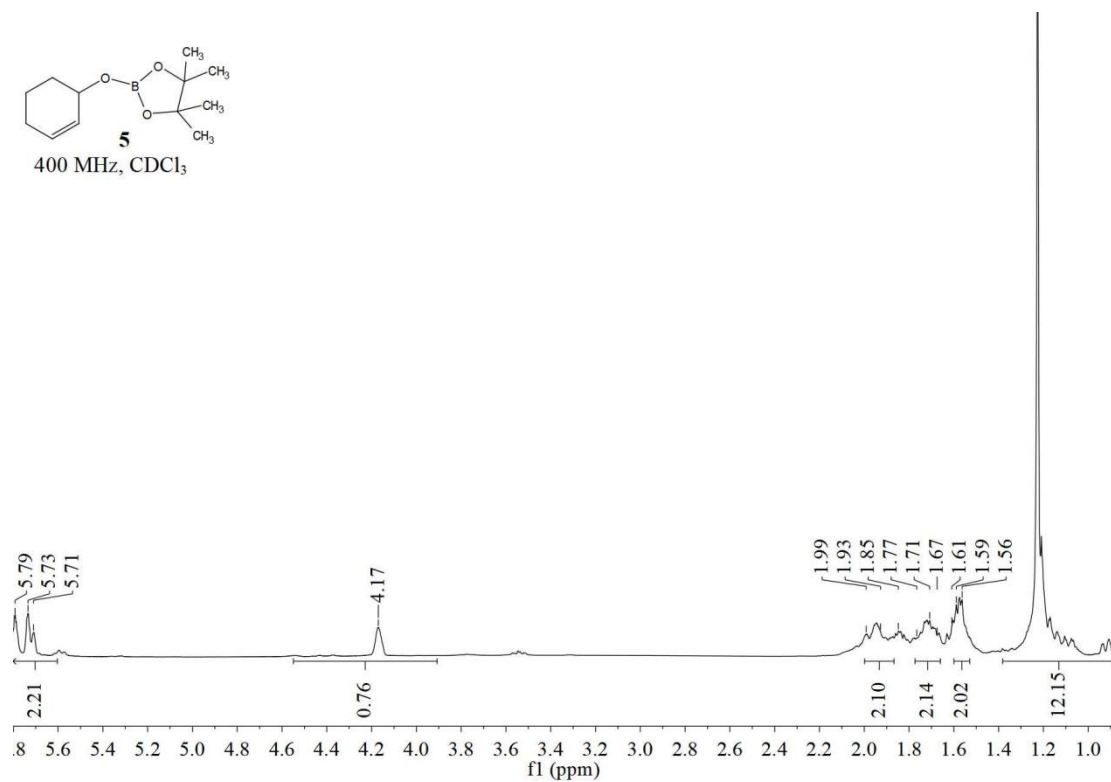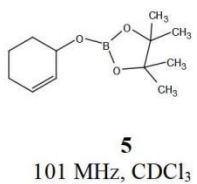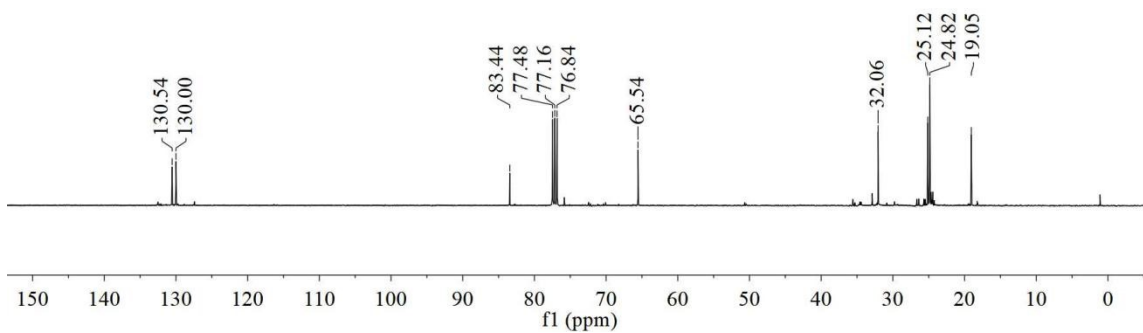

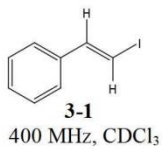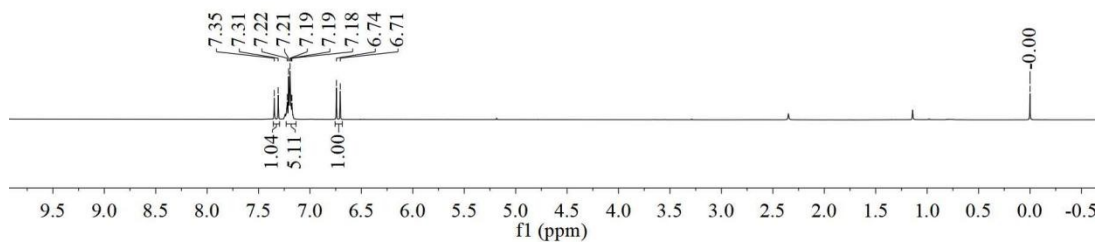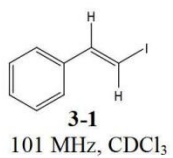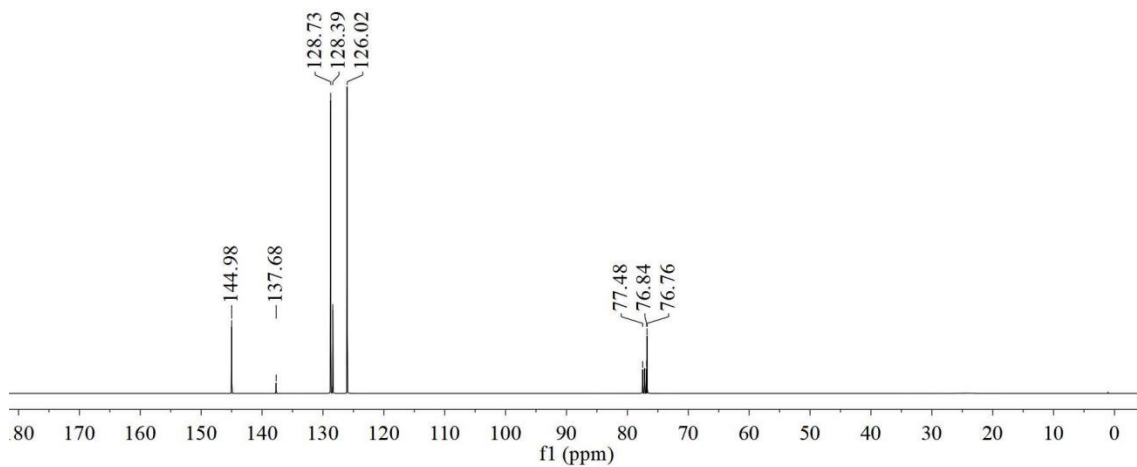

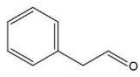

3-2

400 MHz, CDCl<sub>3</sub>

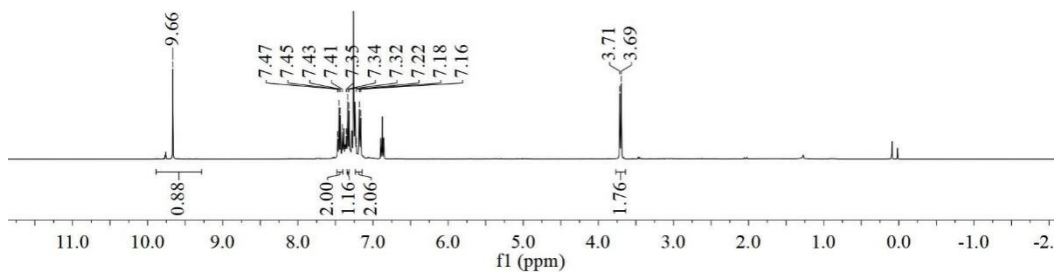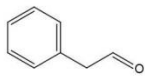

3-2

101 MHz, CDCl<sub>3</sub>

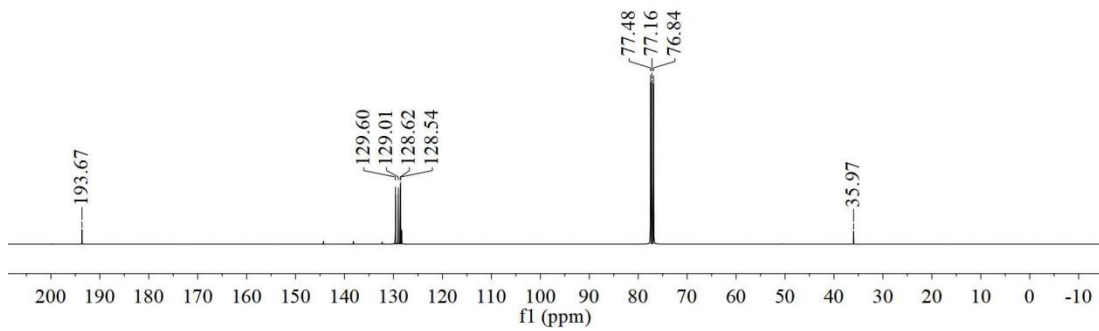



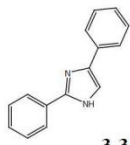

3-3

101 MHz, CDCl<sub>3</sub>

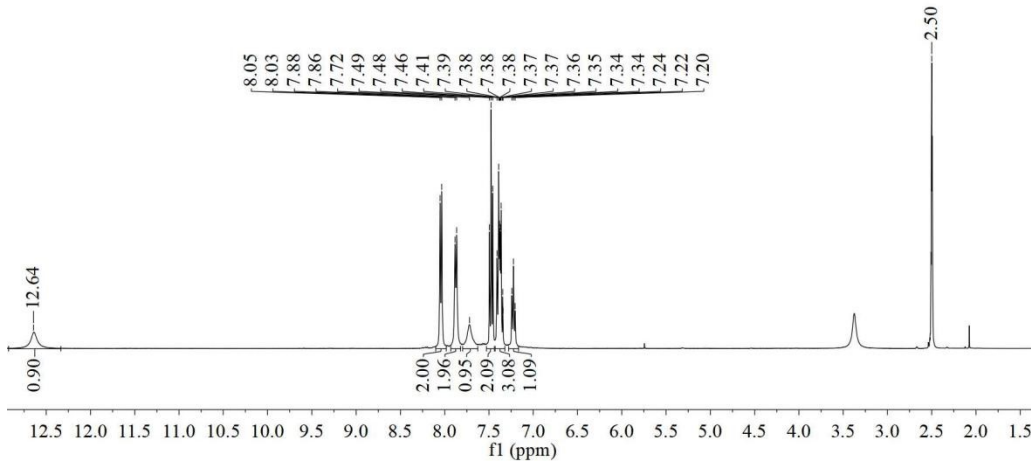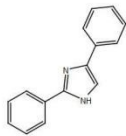

3-3

400 MHz, CDCl<sub>3</sub>

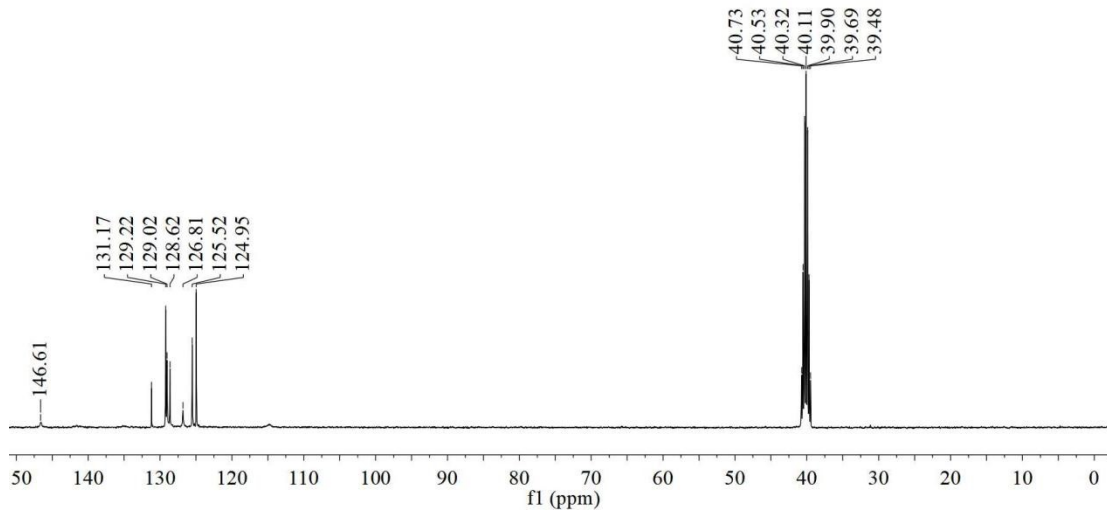

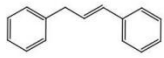

**3-4**  
400 MHz, CDCl<sub>3</sub>

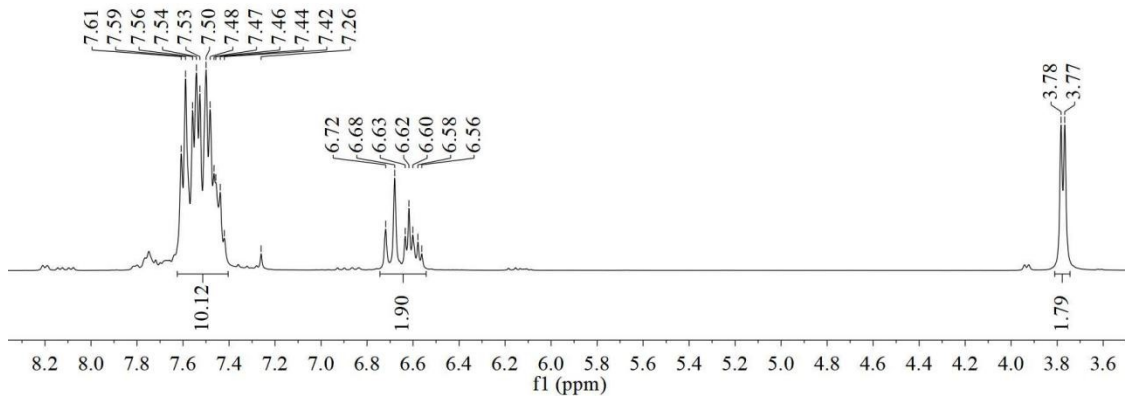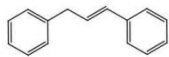

**3-4**  
101 MHz, CDCl<sub>3</sub>

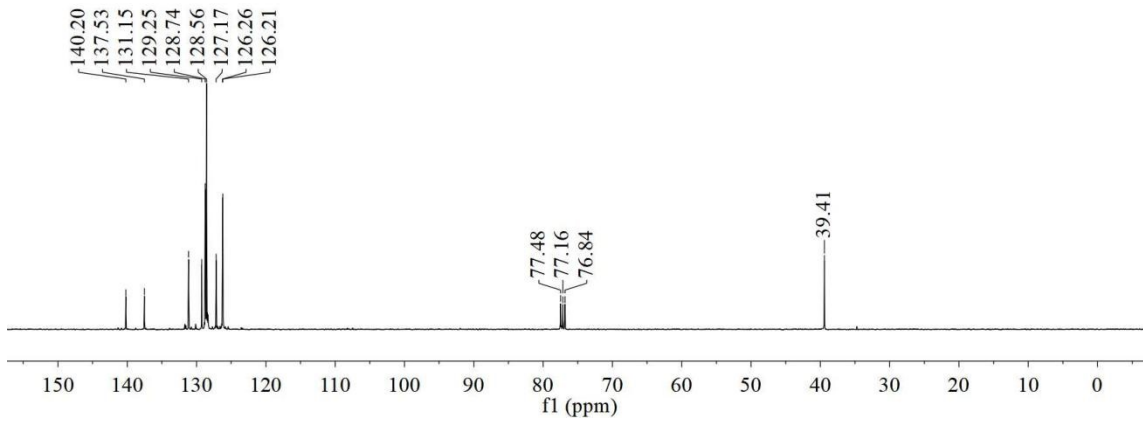

Supplement: d3nj04957d1.pdf [file d3nj04957d1.pdf]
